# Supplementary material for: 1-D manganese(ii)-terpyridine coordination polymers as precatalysts for hydrofunctionalisation of carbonyl compounds
Source: Royal Society of Chemistry journal article supplement (doi:10.1039/c9dt04637b), 2020-01-01
Supplement: c9dt04637b1.pdf [file c9dt04637b1.pdf]

***Electronic Supplementary Information:***

**1-D manganese(II)-terpyridine coordination polymers as precatalysts for hydrofunctionalization of carbonyl compounds**

Guoqi Zhang,<sup>\*,a</sup> Haisu Zeng,<sup>a,b</sup> Sihan Li,<sup>a,b</sup> Jahvon Johnson,<sup>a</sup> Zixuan Mo,<sup>a</sup> Michelle C. Neary<sup>b</sup> and Shengping Zheng<sup>\*,b</sup>

<sup>a</sup> Department of Sciences, John Jay College and Ph.D. Program in Chemistry, The Graduate Center of the City University of New York, New York, 10019 NY, USA.

<sup>b</sup> Department of Chemistry, Hunter College, the City University of New York, New York, 10065 NY, USA.

## Experimental Details

**General Considerations.** The catalytic reactions were carried out under a nitrogen atmosphere using standard glove-box technique. Anhydrous grade solvents and liquid reagents used were obtained from Aldrich or Fisher Scientific and stored over 4 Å molecular sieves. FT-IR spectra were recorded on a Shimadzu 8400S instrument with solid samples under N<sub>2</sub> using a Golden Gate ATR accessory. <sup>1</sup>H NMR and <sup>13</sup>C NMR spectra were obtained at room temperature on a Bruker AV 400, 500 or 600 MHz NMR spectrometer, with chemical shifts (δ) referenced to the residual solvent signal. GC-MS analysis was obtained using a Shimadzu GCMS-QP2010S gas chromatograph mass spectrometer. 2,2';6',2''-Terpyridine was purchased from Sigma-Aldrich. 4'-Pyridyl-2,2';6',2''-tpy (**pytpy**) was prepared according to the literature procedure.<sup>1</sup>

**Synthesis of 1.** A solution of **pytpy** (31.0 mg, 0.100 mmol) in MeOH/CH<sub>2</sub>Cl<sub>2</sub> (10 mL, 1 : 3, v/v) was placed in a test tube. A blank solution of MeOH/CH<sub>2</sub>Cl<sub>2</sub> (4 mL, 1: 1, v/v) was layered on the top of the ligand solution, followed by a solution of MnCl<sub>2</sub> (12.5 mg, 0.100 mmol) in MeOH (8 mL). The tube was sealed and allowed to stand at room temperature for about four weeks, during which time X-ray quality yellow blocks grew at the bottom of the tube. The crystals were collected by decanting the solvent and washed with MeOH and then dried in vacuo. Yield: 37.5 mg (86%). FT-IR (solid, cm<sup>-1</sup>): 3058m, 1597s, 1571w, 1537s, 1475s, 1407s, 1301w, 1246s, 1165s, 1080s, 1010s, 900w, 847m, 838s, 730m. Anal. Calcd. for C<sub>20</sub>H<sub>14</sub>Cl<sub>2</sub>MnN<sub>4</sub>: C 55.07, H 3.24, N 12.84%. Found C 54.62, H 3.51, N 12.73. In a separate experiment, in a 100 mL flask, **pytpy** (0.62 g, 2.00 mmol) was dissolved in MeOH/CH<sub>2</sub>Cl<sub>2</sub> (40 mL, 1 : 3, v/v), to which a solution of MnCl<sub>2</sub> (0.25 g, 2.00 mmol) in MeOH (20 mL) was added dropwise in 3 min. The reaction mixture was allowed to stay for additional 10 min, yellow microcrystals had formed rapidly and were filtered out to give microcrystalline solid of **1** (yield: 0.71 g, 82%). Microanalysis revealed that the composition of this sample was identical to that of **1** and catalytic experiment also confirmed its activity and efficiency for hydroboration of acetophenone.

**Synthesis of 2.** A solution of **pytpy** (31.0 mg, 0.100 mmol) in MeOH/CH<sub>2</sub>Cl<sub>2</sub> (10 mL, 1 : 3, v/v) was placed in a test tube. A blank solution of MeOH/CH<sub>2</sub>Cl<sub>2</sub> (4 mL, 1: 1, v/v) was layered on the top of the ligand solution, followed by a solution of MnBr<sub>2</sub> (21.5 mg, 0.100 mmol) in MeOH (8 mL). The tube was sealed and allowed to stand at room temperature for about four weeks, during which time X-ray quality orange crystals grew at the bottom of the tube. The crystals were collected by decanting the solvent and washed with MeOH and then dried in vacuo overnight. Yield: 47.2 mg (90%). FT-IR (solid, cm<sup>-1</sup>) 3050m, 1633w, 1598s, 1570w, 1535s, 1475m, 1408s, 1246m, 1154m, 1095m, 1076m, 1011s, 904m, 850m, 833m, 798s, 734s, 648s. Anal. Calcd. for C<sub>20</sub>H<sub>14</sub>Br<sub>2</sub>MnN<sub>4</sub>: C 45.75, H 2.69, N 10.67%. Found C 45.11, H 2.67, N 10.89.

**General Procedure for 1-Catalysed Hydroboration of Ketones and Aldehydes.** In a glovebox under nitrogen atmosphere, CP **1** (0.44 mg, 1.0 μmol, based on Mn(L)Cl<sub>2</sub>) and KO<sup>t</sup>Bu (1.1 mg, 10 μmol) was dissolved in THF (1.0 mL) in a 3.8 mL glass vial equipped with a stir bar. Ketone or aldehyde (1.0 mmol) and pinacolborane (140.8 mg, 1.1 mmol) were then added. The reaction mixture was allowed to stir at room temperature for 2 h. At completion of the reaction, the reaction was exposed to the air and the solvent was evaporated. The hydroborated product was first analysed by GC-MS using a dilute CH<sub>2</sub>Cl<sub>2</sub> solution, and then the crude reaction mixture was

purified through flash column chromatography with SiO<sub>2</sub> using ethyl acetate/hexane as an eluent. The alcohol products were characterized by <sup>1</sup>H and <sup>13</sup>C NMR spectroscopies.

**General Procedure for 1-Catalysed Hydrosilylation of Ketones and Aldehydes.** In a glovebox under nitrogen atmosphere, CP **1** (0.44 mg, 1.0 μmol, based on Mn(L)Cl<sub>2</sub>) and KO<sup>t</sup>Bu (1.1 mg, 10 μmol) was dissolved in THF (1.0 mL) in a 3.8 mL glass vial equipped with a stir bar. Ketone or aldehyde (1.0 mmol) and phenylsilane (130.0 mg, 1.2 mmol) were then added. The reaction mixture was allowed to stir at room temperature for 2 h. At completion of the reaction, the reaction was exposed to the air and the solvent was evaporated. The hydroborated product was first analysed by GC-MS using a dilute CH<sub>2</sub>Cl<sub>2</sub> solution, and then the crude reaction mixture was treated with 2N NaOH in methanol (5 mL) for 2 h. The solution was extracted with ethyl acetate and washed with brine and water. The filtrate was then purified through a flash column chromatography with SiO<sub>2</sub> using ethyl acetate/hexane as an eluent. The alcohol products were characterized by <sup>1</sup>H and <sup>13</sup>C NMR spectroscopies.

**General Procedure for 1-Catalysed Hydrosilylation of Styrenes.** In a glovebox under nitrogen atmosphere, CP **1** (0.44 mg, 1.0 μmol, based on Mn(L)Cl<sub>2</sub>) and KO<sup>t</sup>Bu (1.1 mg, 10 μmol) was dissolved in THF (1.0 mL) in a 3.8 mL glass vial equipped with a stir bar. Ketone or aldehyde (1.0 mmol) and phenylsilane (130.0 mg, 1.2 mmol) were then added. The reaction mixture was allowed to stir at room temperature for 2 h. At completion of the reaction, the reaction was exposed to the air and the solvent was evaporated. The hydroborated product was first analysed by GC-MS using a dilute CH<sub>2</sub>Cl<sub>2</sub> solution, and then the crude mixture was purified through a flash column chromatography with SiO<sub>2</sub> using ethyl acetate/hexane as an eluent. The products were characterized by <sup>1</sup>H and <sup>13</sup>C NMR spectroscopies.

**X-ray Crystallography.** Suitable crystals of **1** and **2** were mounted on Cryoloops with Paratone-N oil. Data were collected with a Bruker X8 Kappa Apex II diffractometer using Mo-Kα radiation and corrected for absorption with SADABS and structures solved by direct methods. All non-hydrogen atoms were refined anisotropically by full-matrix least squares on F<sup>2</sup>. Hydrogen atoms were found from Fourier difference maps and refined isotropically, otherwise they were placed in calculated positions with appropriate riding parameters. CCDC No. 1969921 (**1**) and 1969922 (**2**) contain the supplementary crystallographic data for this paper. These data can be obtained free of charge via <http://www.ccdc.cam.ac.uk/conts/retrieving.html>, or from the Cambridge Crystallographic Data Centre, 12 Union Road, Cambridge CB2 1EZ, UK; fax: (+44) 1223-336-033; or e-mail: [deposit@ccdc.cam.ac.uk](mailto:deposit@ccdc.cam.ac.uk). The crystallographic refinement data are listed in Table S1.

**Table S1.** X-ray crystallographic data for **1** and **2**.

|                                                      | <b>1</b>                                                                                                      | <b>2</b>                                                                                                                       |
|------------------------------------------------------|---------------------------------------------------------------------------------------------------------------|--------------------------------------------------------------------------------------------------------------------------------|
| Empirical formula                                    | C <sub>20</sub> H <sub>18</sub> Cl <sub>2</sub> MnN <sub>4</sub> O <sub>2</sub>                               | C <sub>21</sub> H <sub>18</sub> Br <sub>2</sub> MnN <sub>4</sub> O                                                             |
| FW                                                   | 472.22                                                                                                        | 557.15                                                                                                                         |
| T (K)                                                | 200(2)                                                                                                        | 130(2)                                                                                                                         |
| Wavelength (Å)                                       | 0.71073                                                                                                       | 0.71073                                                                                                                        |
| space group                                          | Monoclinic, <i>P</i> 2/n                                                                                      | Triclinic, <i>P</i> -1                                                                                                         |
| cell dimensions (Å, deg)                             | a = 8.9559(9)<br>b = 11.5794(11)<br>c = 10.6239(11)<br>$\alpha$ = 90<br>$\beta$ = 114.012(5)<br>$\gamma$ = 90 | a = 8.8113(2)<br>b = 10.2327(3)<br>c = 11.4867(3)<br>$\alpha$ = 95.1760(10)<br>$\beta$ = 91.4490(10)<br>$\gamma$ = 94.4070(10) |
| V(Å <sup>3</sup> )                                   | 1006.40(17)                                                                                                   | 1027.87(5)                                                                                                                     |
| Z, $\rho$ (Mg/m <sup>3</sup> )                       | 2, 1.558                                                                                                      | 2, 1.800                                                                                                                       |
| $\mu$ (mm <sup>-1</sup> )                            | 7.987                                                                                                         | 4.550                                                                                                                          |
| F (000)                                              | 482                                                                                                           | 550                                                                                                                            |
| crystal size (mm)                                    | 0.17 × 0.15 × 0.10                                                                                            | 0.360 × 0.250 × 0.060                                                                                                          |
| $\theta$ range (deg)                                 | 3.82 to 69.21                                                                                                 | 2.56 to 36.85                                                                                                                  |
| index ranges                                         | -10 ≤ h ≤ 10<br>-14 ≤ k ≤ 13<br>-12 ≤ l ≤ 12                                                                  | -14 ≤ h ≤ 14<br>-17 ≤ k ≤ 17<br>-19 ≤ l ≤ 19                                                                                   |
| reflections collected                                | 11286                                                                                                         | 45159                                                                                                                          |
| unique reflections                                   | 1762 [R(int) = 0.0584]                                                                                        | 10067 [R(int) = 0.0373]                                                                                                        |
| goodness of fit on F <sup>2</sup>                    | 1.074                                                                                                         | 1.037                                                                                                                          |
| R <sub>1</sub> ( <i>I</i> > 2 $\sigma$ ( <i>I</i> )) | 0.0557                                                                                                        | 0.0325                                                                                                                         |
| wR <sub>2</sub> (all data)                           | 0.1400                                                                                                        | 0.0726                                                                                                                         |

### Synthetic details and characterization data

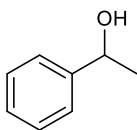

Chemical Formula: C<sub>8</sub>H<sub>10</sub>O  
Molecular Weight: 122.1670

**3a:**<sup>2</sup> In a glovebox under nitrogen atmosphere, CP **1** (0.44 mg, 1.0 μmol, based on Mn(L)Cl<sub>2</sub>) and KO<sup>t</sup>Bu (1.1 mg, 10 μmol) was dissolved in THF (1.0 mL) in a 3.8 mL glass vial equipped with a stir bar. Acetophenone (120.0 mg, 1.0 mmol) and pinacolborane (140.8 mg, 1.1 mmol) were then added. The reaction mixture was allowed to stir at room temperature for 2 h. At completion of the reaction, the reaction was exposed to the air and the solvent was evaporated. The hydroborated product was detected by GC-MS, and then the crude reaction mixture was purified through flash column chromatography with SiO<sub>2</sub> using ethyl acetate/hexane (1:10, v/v) as eluent. Colorless oil of **3a** was isolated. Yield: 112.0 mg (92%). <sup>1</sup>H NMR (600 MHz, Chloroform-*d*) δ 7.44 – 7.31 (m, 4H), 7.30-7.26 (m, 1H), 4.91 (q, *J* = 6.5 Hz, 1H), 1.66 (br., 1H), 1.51 (d, *J* = 6.4 Hz, 3H) ppm; <sup>13</sup>C NMR (151 MHz, Chloroform-*d*) δ 145.9, 128.6, 127.6, 125.5, 70.6, 29.8, 25.3 ppm.

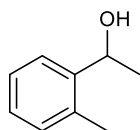

Chemical Formula: C<sub>9</sub>H<sub>12</sub>O  
Molecular Weight: 136.1940

**3b:**<sup>2</sup> In a glovebox under nitrogen atmosphere, CP **1** (0.44 mg, 1.0 μmol, based on Mn(L)Cl<sub>2</sub>) and KO<sup>t</sup>Bu (1.1 mg, 10 μmol) was dissolved in THF (1.0 mL) in a 3.8 mL glass vial equipped with a stir bar. 2'-methylacetophenone (134.0 mg, 1.0 mmol) and pinacolborane (140.8 mg, 1.1 mmol) were then added. The reaction mixture was allowed to stir at room temperature for 2 h. At completion of the reaction, the reaction was exposed to the air and the solvent was evaporated. The hydroborated product was detected by GC-MS, and then the crude reaction mixture was purified through flash column chromatography with SiO<sub>2</sub> using ethyl acetate/hexane (1:10, v/v) as eluent. Colorless oil of **3b** was isolated. Yield: 95.2 mg (70%). <sup>1</sup>H NMR (600 MHz, CDCl<sub>3</sub>) δ 7.54 (dd, *J* = 7.8, 1.7 Hz, 1H), 7.27 (td, *J* = 7.4, 1.6 Hz, 1H), 7.21 (td, *J* = 7.4, 1.6 Hz, 1H), 7.17 (dd, *J* = 7.7, 1.8 Hz, 1H), 5.14 (q, *J* = 6.5 Hz, 1H), 2.37 (s, 3H), 2.11 (s, 1H), 1.49 (d, *J* = 6.4 Hz, 3H) ppm; <sup>13</sup>C NMR (151 MHz, CDCl<sub>3</sub>) δ 143.9, 134.3, 130.4, 127.2, 126.4, 124.6, 66.8, 24.0, 19.0 ppm.

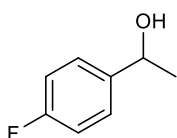

Chemical Formula: C<sub>8</sub>H<sub>9</sub>FO  
Molecular Weight: 140.1574

**3c:**<sup>2</sup> In a glovebox under nitrogen atmosphere, CP **1** (0.44 mg, 1.0 μmol, based on Mn(L)Cl<sub>2</sub>) and KO<sup>t</sup>Bu (1.1 mg, 10 μmol) was dissolved in THF (1.0 mL) in a 3.8 mL glass vial equipped with a stir bar. 4'-Fluoroacetophenone (138.0 mg, 1.0 mmol) and pinacolborane (140.8 mg, 1.1 mmol) were then added. The reaction mixture was allowed to stir at room temperature for 2 h. At completion of the reaction, the reaction was exposed to the air and the solvent was evaporated. The hydroborated product was detected by GC-MS, and then the crude reaction mixture was purified through flash column chromatography with SiO<sub>2</sub> using ethyl acetate/hexane (1:10, v/v) as eluent. Colorless oil of **3c** was isolated. Yield: 125 mg (89%). <sup>1</sup>H NMR (600 MHz, CDCl<sub>3</sub>) δ 7.33 (dd, *J* = 8.7, 5.5 Hz, 2H), 7.02 (t, *J* = 8.7 Hz, 2H), 4.88 (q, *J* = 6.4 Hz, 1H), 1.86 (s, 1H), 1.47 (d, *J* = 6.6 Hz, 3H) ppm; <sup>13</sup>C NMR (151 MHz, CDCl<sub>3</sub>) δ 162.2 (d, *J* = 245.1 Hz), 141.6 (d, *J* = 3.2 Hz), 127.2 (d, *J* = 8.2 Hz), 115.4 (d, *J* = 21.1 Hz), 69.9, 29.8, 25.4 ppm.

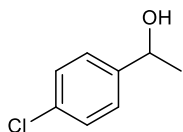

Chemical Formula:  $C_8H_9ClO$   
Molecular Weight: 156.6090

**3d:**<sup>2</sup> In a glovebox under nitrogen atmosphere, CP **1** (0.44 mg, 1.0  $\mu$ mol, based on  $Mn(L)Cl_2$ ) and  $KO^tBu$  (1.1 mg, 10  $\mu$ mol) was dissolved in THF (1.0 mL) in a 3.8 mL glass vial equipped with a stir bar. 4'-Chloroacetophenone (154.0 mg, 1.0 mmol) and pinacolborane (140.8 mg, 1.1 mmol) were then added. The reaction mixture was allowed to stir at room temperature for 2 h. At completion of the reaction, the reaction was exposed to the air and the solvent was evaporated. The hydroborated product was detected by GC-MS, and then the crude reaction mixture was purified through flash column chromatography with  $SiO_2$  using ethyl acetate/hexane (1:10, v/v) as eluent. Colorless oil of **3d** was isolated. Yield: 140.9 mg (90%).  $^1H$  NMR (600 MHz,  $CDCl_3$ )  $\delta$  7.28 (dt,  $J$  = 9.2, 2.5 Hz, 2H), 7.25 (dd,  $J$  = 7.3, 4.6 Hz, 2H), 4.79 (q,  $J$  = 6.5 Hz, 1H), 2.71 (s, 1H), 1.41 (d,  $J$  = 6.6 Hz, 3H) ppm;  $^{13}C$  NMR (151 MHz,  $CDCl_3$ )  $\delta$  144.5, 133.2, 128.8, 127.1, 69.9, 25.5 ppm.

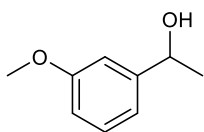

Chemical Formula:  $C_9H_{12}O_2$   
Molecular Weight: 152.1930

**3e:**<sup>2</sup> In a glovebox under nitrogen atmosphere, CP **1** (0.44 mg, 1.0  $\mu$ mol, based on  $Mn(L)Cl_2$ ) and  $KO^tBu$  (1.1 mg, 10  $\mu$ mol) was dissolved in THF (1.0 mL) in a 3.8 mL glass vial equipped with a stir bar. 3'-Methoxyacetophenone (150.0 mg, 1.0 mmol) and pinacolborane (140.8 mg, 1.1 mmol) were then added. The reaction mixture was allowed to stir at room temperature for 2 h. At completion of the reaction, the reaction was exposed to the air and the solvent was evaporated. The hydroborated product was detected by GC-MS, and then the crude reaction mixture was purified through flash column chromatography with  $SiO_2$  using ethyl acetate/hexane (1:10, v/v) as eluent. Colorless oil of **3e** was isolated. Yield: 144.4 mg (95%).  $^1H$  NMR (600 MHz,  $CDCl_3$ )  $\delta$  7.29 (t,  $J$  = 8.1 Hz, 1H), 7.01 – 6.91 (m, 2H), 6.83 (dd,  $J$  = 8.3, 2.6 Hz, 1H), 4.89 (q,  $J$  = 6.5 Hz, 1H), 3.84 (s, 3H), 1.99 (s, 1H), 1.51 (d,  $J$  = 6.6 Hz, 3H) ppm;  $^{13}C$  NMR (150 MHz,  $CDCl_3$ )  $\delta$  159.9, 147.7, 129.6, 117.8, 113.0, 111.0, 70.4, 55.3, 25.2 ppm.

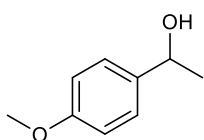

Chemical Formula:  $C_9H_{12}O_2$   
Molecular Weight: 152.1930

**3f:**<sup>2</sup> In a glovebox under nitrogen atmosphere, CP **1** (0.44 mg, 1.0  $\mu$ mol, based on  $Mn(L)Cl_2$ ) and  $KO^tBu$  (1.1 mg, 10  $\mu$ mol) was dissolved in THF (1.0 mL) in a 3.8 mL glass vial equipped with a stir bar. 4'-Methoxyacetophenone (150.0 mg, 1.0 mmol) and pinacolborane (140.8 mg, 1.1 mmol) were then added. The reaction mixture was allowed to stir at room temperature for 2 h. At completion of the reaction, the reaction was exposed to the air and the solvent was evaporated. The hydroborated product was detected by GC-MS, and then the crude reaction mixture was purified through flash column chromatography with  $SiO_2$  using ethyl acetate/hexane (1:10, v/v) as eluent. Colorless oil of **3f** was isolated. Yield: 142.0 mg (93%).  $^1H$  NMR (600 MHz,  $CDCl_3$ )  $\delta$  7.35 – 7.26 (m, 2H), 6.89 (d,  $J$  = 8.8 Hz, 2H), 4.86 (q,  $J$  = 6.4 Hz, 1H), 3.81 (s, 3H), 1.74 (s, 1H), 1.48 (d,  $J$  = 6.5 Hz, 3H) ppm.  $^{13}C$  NMR (151 MHz,  $CDCl_3$ )  $\delta$  159.1, 138.1, 126.8, 114.0, 70.1, 55.4, 29.8, 25.1 ppm.

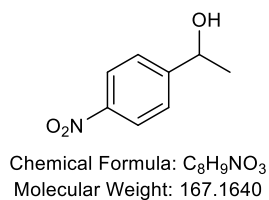

**3g:**<sup>2</sup> In a glovebox under nitrogen atmosphere, CP **1** (0.44 mg, 1.0  $\mu$ mol, based on  $Mn(L)Cl_2$ ) and KO<sup>t</sup>Bu (1.1 mg, 10  $\mu$ mol) was dissolved in THF (1.0 mL) in a 3.8 mL glass vial equipped with a stir bar. 4'-Nitroacetophenone (165.0 mg, 1.0 mmol) and pinacolborane (140.8 mg, 1.1 mmol) were then added. The reaction mixture was allowed to stir at room temperature for 2 h. At completion of the reaction, the reaction was exposed to the air and the solvent was evaporated. The hydroborated product was detected by GC-MS, and then the crude reaction mixture was purified through flash column chromatography with  $SiO_2$  using ethyl acetate/hexane (1:10, v/v) as eluent. Yellowish oil of **3g** was isolated. Yield: 147.1 mg (88%). <sup>1</sup>H NMR (600 MHz,  $CDCl_3$ )  $\delta$  8.18 (td,  $J$  = 6.7, 3.4 Hz, 2H), 7.53 (td,  $J$  = 6.7, 3.4 Hz, 2H), 5.07 – 4.96 (m, 1H), 2.06 (s, 1H), 1.64 – 1.38 (m, 3H) ppm. <sup>13</sup>C NMR (151 MHz,  $CDCl_3$ )  $\delta$  153.7, 147.6, 126.8, 125.5, 124.5, 123.2, 70.1, 26.1 ppm.

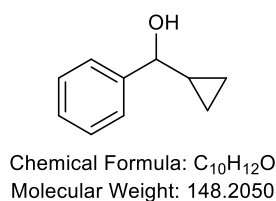

**3h:**<sup>2</sup> In a glovebox under nitrogen atmosphere, CP **1** (0.44 mg, 1.0  $\mu$ mol, based on  $Mn(L)Cl_2$ ) and KO<sup>t</sup>Bu (1.1 mg, 10  $\mu$ mol) was dissolved in THF (1.0 mL) in a 3.8 mL glass vial equipped with a stir bar. Cyclopropyl phenyl ketone (146.0 mg, 1.0 mmol) and pinacolborane (140.8 mg, 1.1 mmol) were then added. The reaction mixture was allowed to stir at room temperature for 2 h. At completion of the reaction, the reaction was exposed to the air and the solvent was evaporated. The hydroborated product was detected by GC-MS, and then the crude reaction mixture was purified through flash column chromatography with  $SiO_2$  using ethyl acetate/hexane (1:10, v/v) as eluent. Colorless oil of **3h** was isolated. Yield: 110.07 mg (74%). <sup>1</sup>H NMR (600 MHz,  $CDCl_3$ )  $\delta$  7.28 – 7.18 (m, 2H), 7.18 – 7.10 (m, 2H), 7.08 (t,  $J$  = 7.5 Hz, 1H), 3.75 (d,  $J$  = 8.8 Hz, 1H), 2.24 (s, 1H), 0.99 (dtd,  $J$  = 13.1, 8.3, 4.8 Hz, 1H), 0.41 (tt,  $J$  = 8.7, 4.9 Hz, 1H), 0.33 (tt,  $J$  = 8.7, 4.9 Hz, 1H), 0.25 (dq,  $J$  = 10.0, 5.0 Hz, 1H), 0.15 (dq,  $J$  = 9.9, 5.0 Hz, 1H) ppm; <sup>13</sup>C NMR (150 MHz,  $CDCl_3$ )  $\delta$  144.1, 128.6, 127.7, 126.3, 78.8, 19.4, 3.9, 3.1 ppm.

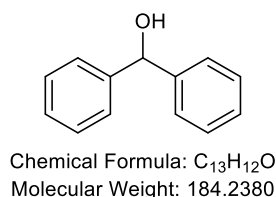

**3i:**<sup>2</sup> In a glovebox under nitrogen atmosphere, CP **1** (0.44 mg, 1.0  $\mu$ mol, based on  $Mn(L)Cl_2$ ) and KO<sup>t</sup>Bu (1.1 mg, 10  $\mu$ mol) was dissolved in THF (1.0 mL) in a 3.8 mL glass vial equipped with a stir bar. Benzophenone (182.1 mg, 1.0 mmol) and pinacolborane (140.8 mg, 1.1 mmol) were then added. The reaction mixture was allowed to stir at room temperature for 2 h. At completion of the reaction, the reaction was exposed to the air and the solvent was evaporated. The hydroborated product was detected by GC-MS, and then the crude reaction mixture was purified through flash column chromatography with  $SiO_2$  using ethyl acetate/hexane (1:10, v/v) as eluent. White solid of **3i** was isolated. Yield: 173.0 mg (94%). <sup>1</sup>H NMR (600 MHz,  $CDCl_3$ )  $\delta$  7.43 – 7.40 (m, 4H), 7.38 – 7.35 (m, 4H), 7.32 – 7.28 (m, 2H), 5.88 (s, 1H), 2.26 (s, 1H) ppm; <sup>13</sup>C NMR (151 MHz,  $CDCl_3$ )  $\delta$  143.9, 128.6, 127.7, 126.6, 76.4 ppm.

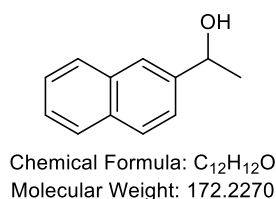

**3j:**<sup>3</sup> In a glovebox under nitrogen atmosphere, CP **1** (0.44 mg, 1.0  $\mu$ mol, based on  $Mn(L)Cl_2$ ) and KO<sup>t</sup>Bu (1.1 mg, 10  $\mu$ mol) was dissolved in THF (1.0 mL) in a 3.8 mL glass vial equipped with a stir bar. 2-Acetylnaphthalene (170.0 mg, 1.0 mmol) and pinacolborane (140.8 mg, 1.1 mmol) were then added. The reaction mixture was allowed to stir at

room temperature for 2 h. At completion of the reaction, the reaction was exposed to the air and the solvent was evaporated. The hydroborated product was detected by GC-MS, and then the crude reaction mixture was purified through flash column chromatography with SiO<sub>2</sub> using ethyl acetate/hexane (1:10, v/v) as eluent. White solid of **3j** was isolated. Yield: 125.5mg (73%). <sup>1</sup>H NMR (600 MHz, CDCl<sub>3</sub>) δ 7.93 – 7.79 (m, 3H), 7.78 (d, *J* = 2.9 Hz, 1H), 7.59 – 7.50 (m, 2H), 7.49 (dd, *J* = 8.5, 2.2 Hz, 1H), 5.00 (q, *J* = 6.6 Hz, 1H), 3.05 (s, 1H), 1.58 (d, *J* = 6.8 Hz, 3H) ppm; <sup>13</sup>C NMR (150 MHz, CDCl<sub>3</sub>) δ 143.5, 133.5, 133.1, 128.4, 128.2, 127.9, 126.3, 125.9, 124.1, 124.0, 70.5, 25.3 ppm.

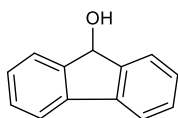

Chemical Formula: C<sub>13</sub>H<sub>10</sub>O  
Molecular Weight: 182.2220

**3k**:<sup>4</sup> In a glovebox under nitrogen atmosphere, CP **1** (0.44 mg, 1.0 μmol, based on Mn(L)Cl<sub>2</sub>) and KO<sup>t</sup>Bu (1.1 mg, 10 μmol) was dissolved in THF (1.0 mL) in a 3.8 mL glass vial equipped with a stir bar. Fluorenone (180.0 mg, 1.0 mmol) and pinacolborane (140.8 mg, 1.1 mmol) were then added. The reaction mixture was allowed to stir at room temperature for 2 h. At completion of the reaction, the reaction was exposed to the air and the solvent was evaporated. The hydroborated product was detected by GC-MS, and then the crude reaction mixture was purified through flash column chromatography with SiO<sub>2</sub> using ethyl acetate/hexane (1:10, v/v) as eluent. White solid of **3k** was isolated. Yield: 173.0 mg (95%). <sup>1</sup>H NMR (600 MHz, CD<sub>3</sub>OD) δ 7.71 – 7.63 (m, 2H), 7.63 – 7.56 (m, 2H), 7.36 (td, *J* = 7.5, 1.5 Hz, 2H), 7.30 (td, *J* = 7.4, 1.4 Hz, 2H), 5.49 (s, 1H), 4.94 (s, 1H) ppm; <sup>13</sup>C NMR (151 MHz, CD<sub>3</sub>OD) δ 148.2, 142.2, 130.6, 129.4, 126.9, 121.6, 76.2 ppm.

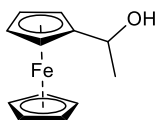

Chemical Formula: C<sub>12</sub>H<sub>14</sub>FeO  
Molecular Weight: 230.0880

**3l**:<sup>3</sup> In a glovebox under nitrogen atmosphere, CP **1** (0.44 mg, 1.0 μmol, based on Mn(L)Cl<sub>2</sub>) and KO<sup>t</sup>Bu (1.1 mg, 10 μmol) was dissolved in THF (1.0 mL) in a 3.8 mL glass vial equipped with a stir bar. 1-acetylferrocene (228.0 mg, 1.0 mmol) and pinacolborane (140.8 mg, 1.1 mmol) were then added. The reaction mixture was allowed to stir at room temperature for 2 h. At completion of the reaction, the reaction was exposed to the air and the solvent was evaporated. The hydroborated product was detected by GC-MS, and then the crude reaction mixture was purified through flash column chromatography with SiO<sub>2</sub> using ethyl acetate/hexane (1:10, v/v) as eluent. Yellow solid of **3l** was isolated. Yield: 211.5 mg (92%). <sup>1</sup>H NMR (600 MHz, CDCl<sub>3</sub>): δ 4.51 (q, *J* = 6.4 Hz, 1H), 4.22 (m, 9H), 2.03 (s, 1H), 1.44 (d, *J* = 7.1 Hz, 3H) ppm. <sup>13</sup>C NMR (151 MHz, CDCl<sub>3</sub>): δ 95.1, 68.8, 68.3, 68.3, 66.7, 66.5, 65.7, 23.8 ppm.

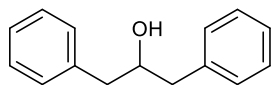

Chemical Formula: C<sub>15</sub>H<sub>16</sub>O  
Molecular Weight: 212.2920

**3m**:<sup>4</sup> In a glovebox under nitrogen atmosphere, CP **1** (0.44 mg, 1.0 μmol, based on Mn(L)Cl<sub>2</sub>) and KO<sup>t</sup>Bu (1.1 mg, 10 μmol) was dissolved in THF (1.0 mL) in a 3.8 mL glass vial equipped with a stir bar. 1,3-Diphenylacetone (210.0 mg, 1.0 mmol) and pinacolborane (140.8 mg, 1.1 mmol) were then added. The reaction mixture was allowed to stir at room temperature for 2 h. At completion of the reaction, the reaction was exposed to the air and the solvent was evaporated. The hydroborated product was detected by GC-MS, and then the crude reaction mixture was purified through flash column chromatography with SiO<sub>2</sub> using ethyl acetate/hexane (1:10, v/v) as eluent. Colorless oil of **3m** was isolated. Yield: 193.2 mg (91%). <sup>1</sup>H NMR (600 MHz, CDCl<sub>3</sub>) δ 7.35 – 7.16 (m, 4H), 7.15 – 6.89 (m, 6H), 3.91 (tq, *J* = 8.2, 4.1 Hz,

1H), 2.72 (dd,  $J = 13.8, 5.0$  Hz, 2H), 2.62 (dd,  $J = 13.9, 8.3$  Hz, 2H), 1.68 (d,  $J = 3.7$  Hz, 1H) ppm;  $^{13}\text{C}$  NMR (150 MHz,  $\text{CDCl}_3$ )  $\delta$  138.77, 129.7, 128.8, 126.7, 73.82, 43.6 ppm.

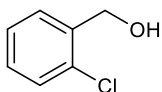

Chemical Formula:  $\text{C}_7\text{H}_7\text{ClO}$   
Molecular Weight: 142.5820

**4a:**<sup>4</sup> In a glovebox under nitrogen atmosphere, CP **1** (0.44 mg, 1.0  $\mu\text{mol}$ , based on  $\text{Mn}(\text{L})\text{Cl}_2$ ) and  $\text{KO}^t\text{Bu}$  (1.1 mg, 10  $\mu\text{mol}$ ) was dissolved in THF (1.0 mL) in a 3.8 mL glass vial equipped with a stir bar. 2-Chlorobenzaldehyde (140.0 mg, 1.0 mmol) and pinacolborane (140.8 mg, 1.1 mmol) were then added. The reaction mixture was allowed to stir at room temperature for 2 h. At completion of the reaction, the reaction was exposed to the air and the solvent was evaporated. The hydroborated product was detected by GC-MS, and then the crude reaction mixture was purified through flash column chromatography with  $\text{SiO}_2$  using ethyl acetate/hexane (1:10, v/v) as eluent. Colorless oil of **4a** was isolated. Yield: 136.9 mg (92%).  $^1\text{H}$  NMR (600 MHz,  $\text{CDCl}_3$ )  $\delta$  7.46 (dd,  $J = 7.6, 2.1$  Hz, 1H), 7.35 (dd,  $J = 7.9, 1.7$  Hz, 1H), 7.27 (td,  $J = 7.5, 1.6$  Hz, 1H), 7.23 (td,  $J = 7.6, 1.9$  Hz, 1H), 4.75 (s, 2H), 2.53 (s, 1H) ppm;  $^{13}\text{C}$  NMR (151 MHz,  $\text{CDCl}_3$ )  $\delta$  138.4, 132.9, 129.6, 129.1, 128.9, 127.3, 63.0 ppm.

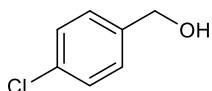

Chemical Formula:  $\text{C}_7\text{H}_7\text{ClO}$   
Molecular Weight: 142.5820

**4b:**<sup>2</sup> In a glovebox under nitrogen atmosphere, CP **1** (0.44 mg, 1.0  $\mu\text{mol}$ , based on  $\text{Mn}(\text{L})\text{Cl}_2$ ) and  $\text{KO}^t\text{Bu}$  (1.1 mg, 10  $\mu\text{mol}$ ) was dissolved in THF (1.0 mL) in a 3.8 mL glass vial equipped with a stir bar. 4-Chlorobenzaldehyde (140.0 mg, 1.0 mmol) and pinacolborane (140.8 mg, 1.1 mmol) were then added. The reaction mixture was allowed to stir at room temperature for 2 h. At completion of the reaction, the reaction was exposed to the air and the solvent was evaporated. The hydroborated product was detected by GC-MS, and then the crude reaction mixture was purified through flash column chromatography with  $\text{SiO}_2$  using ethyl acetate/hexane (1:10, v/v) as eluent. Colorless oil of **4b** was isolated. Yield: 131.0 mg (95%).  $^1\text{H}$  NMR (600 MHz,  $\text{CDCl}_3$ )  $\delta$  7.31 (dd,  $J = 9.4, 2.8$  Hz, 2H), 7.23 (d,  $J = 9.4$  Hz, 2H), 4.56 (s, 2H), 3.09 (s, 1H) ppm;  $^{13}\text{C}$  NMR (150 MHz,  $\text{CDCl}_3$ )  $\delta$  139.4, 133.5, 128.8, 128.5, 64.4 ppm.

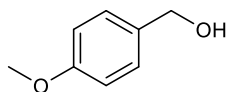

Chemical Formula:  $\text{C}_8\text{H}_{10}\text{O}_2$   
Molecular Weight: 138.1660

**4c:**<sup>2</sup> In a glovebox under nitrogen atmosphere, CP **1** (0.44 mg, 1.0  $\mu\text{mol}$ , based on  $\text{Mn}(\text{L})\text{Cl}_2$ ) and  $\text{KO}^t\text{Bu}$  (1.1 mg, 10  $\mu\text{mol}$ ) was dissolved in THF (1.0 mL) in a 3.8 mL glass vial equipped with a stir bar. 4-Methoxybenzaldehyde (136.0 mg, 1.0 mmol) and pinacolborane (140.8 mg, 1.1 mmol) were then added. The reaction mixture was allowed to stir at room temperature for 2 h. At completion of the reaction, the reaction was exposed to the air and the solvent was evaporated. The hydroborated product was detected by GC-MS, and then the crude reaction mixture was purified through flash column chromatography with  $\text{SiO}_2$  using ethyl acetate/hexane (1:10, v/v) as eluent. Colorless oil of **4c** was isolated. Yield: 131.0 mg (95%).  $^1\text{H}$  NMR (500 MHz,  $\text{CDCl}_3$ )  $\delta$  7.25 (d,  $J = 8.6$  Hz, 2H), 6.88 (d,  $J = 8.6$  Hz, 2H), 4.54 (s, 2H), 3.79 (s, 3H), 3.10 (s, 1H) ppm;  $^{13}\text{C}$  NMR (151 MHz,  $\text{CDCl}_3$ )  $\delta$  159.2, 133.4, 128.8, 114.0, 64.8, 55.4 ppm.

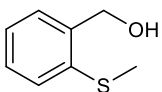

Chemical Formula:  $\text{C}_8\text{H}_{10}\text{OS}$   
Molecular Weight: 154.2270

**4d:**<sup>3</sup> In a glovebox under nitrogen atmosphere, CP **1** (0.44 mg, 1.0  $\mu\text{mol}$ , based on  $\text{Mn}(\text{L})\text{Cl}_2$ ) and  $\text{KO}^t\text{Bu}$  (1.1 mg, 10  $\mu\text{mol}$ ) was dissolved in THF (1.0 mL) in a 3.8 mL glass vial equipped with a stir bar. 2-Methylthiobenzaldehyde (152.0 mg, 1.0 mmol) and pinacolborane (140.8 mg, 1.1 mmol) were then added. The reaction mixture was allowed to stir

at room temperature for 2 h. At completion of the reaction, the reaction was exposed to the air and the solvent was evaporated. The hydroborated product was detected by GC-MS, and then the crude reaction mixture was purified through flash column chromatography with SiO<sub>2</sub> using ethyl acetate/hexane (1:10, v/v) as eluent. Yellowish oil of **4d** was isolated. Yield: 141.8 mg (92%). <sup>1</sup>H NMR (500 MHz, CDCl<sub>3</sub>) δ 7.38 (s, 1H), 7.30 – 7.26 (m, 2H), 7.21 – 7.17 (m, 1H), 4.76 (s, 2H), 2.50 (s, 3H), 1.74 (s, 1H) ppm; <sup>13</sup>C NMR (151 MHz, CDCl<sub>3</sub>) δ 139.0, 136.8, 128.5, 128.2, 126.7, 125.6, 63.7, 16.2 ppm.

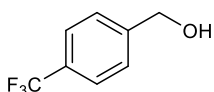

Chemical Formula: C<sub>8</sub>H<sub>7</sub>F<sub>3</sub>O  
Molecular Weight: 176.1382

**4e:**<sup>2</sup> In a glovebox under nitrogen atmosphere, CP **1** (0.44 mg, 1.0 μmol, based on Mn(L)Cl<sub>2</sub>) and KO<sup>t</sup>Bu (1.1 mg, 10 μmol) was dissolved in THF (1.0 mL) in a 3.8 mL glass vial equipped with a stir bar. 4'-Trifluoromethylbenzaldehyde (178.0 mg, 1.0 mmol) and pinacolborane (140.8 mg, 1.1 mmol) were then added. The reaction mixture was allowed to stir at room temperature for 2 h. At completion of the reaction, the reaction was exposed to the air and the solvent was evaporated. The hydroborated product was detected by GC-MS, and then the crude reaction mixture was purified through flash column chromatography with SiO<sub>2</sub> using ethyl acetate/hexane (1:10, v/v) as eluent. Colorless oil of **4e** was isolated. Yield: 169.0 mg (96%). <sup>1</sup>H NMR (600 MHz, CDCl<sub>3</sub>) δ 7.60 (d, *J* = 8.1 Hz, 2H), 7.44 (d, *J* = 8.7 Hz, 2H), 4.80 (s, 2H), 2.58 (s, 1H) ppm; <sup>13</sup>C NMR (150 MHz, CDCl<sub>3</sub>) δ 145.2, 130.05 (q, *J* = 32.3 Hz), 127.2, 125.7 (q, *J* = 3.8 Hz), 125.3, 123.5, 121.74 64.7 ppm.

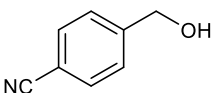

Chemical Formula: C<sub>8</sub>H<sub>7</sub>NO  
Molecular Weight: 133.1500

**4f:**<sup>4</sup> In a glovebox under nitrogen atmosphere, CP **1** (0.44 mg, 1.0 μmol, based on Mn(L)Cl<sub>2</sub>) and KO<sup>t</sup>Bu (1.1 mg, 10 μmol) was dissolved in THF (1.0 mL) in a 3.8 mL glass vial equipped with a stir bar. 4'-Cyanobenzaldehyde (131.0 mg, 1.0 mmol) and pinacolborane (140.8 mg, 1.1 mmol) were then added. The reaction mixture was allowed to stir at room temperature for 2 h. At completion of the reaction, the reaction was exposed to the air and the solvent was evaporated. The hydroborated product was detected by GC-MS, and then the crude reaction mixture was purified through flash column chromatography with SiO<sub>2</sub> using ethyl acetate/hexane (1:10, v/v) as eluent. Colorless oil of **4f** was isolated. Yield: 118.5 mg (89%). <sup>1</sup>H NMR (600 MHz, CDCl<sub>3</sub>) δ 7.58 (d, *J* = 8.6 Hz, 2H), 7.43 (d, *J* = 8.6 Hz, 2H), 4.70 (s, 2H) ppm (H<sup>OH</sup> signal is missing); <sup>13</sup>C NMR (151 MHz, CDCl<sub>3</sub>) δ 146.8, 132.5, 127.2, 119.1, 111.0, 64.0 ppm.

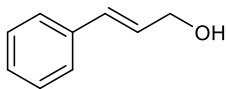

Chemical Formula: C<sub>9</sub>H<sub>10</sub>O  
Molecular Weight: 134.1780

**4g:**<sup>2</sup> In a glovebox under nitrogen atmosphere, CP **1** (0.44 mg, 1.0 μmol, based on Mn(L)Cl<sub>2</sub>) and KO<sup>t</sup>Bu (1.1 mg, 10 μmol) was dissolved in THF (1.0 mL) in a 3.8 mL glass vial equipped with a stir bar. *Trans*-cinnamaldehyde (132.0 mg, 1.0 mmol) and pinacolborane (140.8 mg, 1.1 mmol) were then added. The reaction mixture was allowed to stir at room temperature for 2 h. At completion of the reaction, the reaction was exposed to the air and the solvent was evaporated. The hydroborated product was detected by GC-MS, and then the crude reaction mixture was purified through flash column chromatography with SiO<sub>2</sub> using ethyl acetate/hexane (1:10, v/v) as eluent. Colorless oil of **4g** was isolated. Yield: 126.5 mg (94%). <sup>1</sup>H NMR (500 MHz, CDCl<sub>3</sub>) δ 7.27 – 7.22 (m, 2H), 7.19 (dd, *J* = 8.5, 6.6 Hz, 2H), 7.15 – 7.10 (m, 1H), 6.47 (dt, *J* = 15.9, 1.7 Hz, 1H), 6.22 (dt, *J* = 15.9, 5.7 Hz, 1H), 4.17 (dd, *J* = 5.7, 1.6 Hz,

2H), 2.76 (s, 1H) ppm;  $^{13}\text{C}$  NMR (151 MHz,  $\text{CDCl}_3$ )  $\delta$  136.9, 131.1, 128.8, 128.8, 127.6, 126.7, 63.7 ppm.

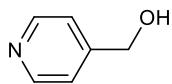

Chemical Formula:  $\text{C}_6\text{H}_7\text{NO}$   
Molecular Weight: 109.1280

**4h:**<sup>3</sup> In a glovebox under nitrogen atmosphere, CP **1** (0.44 mg, 1.0  $\mu\text{mol}$ , based on  $\text{Mn}(\text{L})\text{Cl}_2$ ) and  $\text{KO}^t\text{Bu}$  (1.1 mg, 10  $\mu\text{mol}$ ) was dissolved in THF (1.0 mL) in a 3.8 mL glass vial equipped with a stir bar. Pyridine-4-carboxaldehyde (107.0 mg, 1.0 mmol) and pinacolborane (140.8 mg, 1.1 mmol) were then added. The reaction mixture was allowed to stir at room temperature for 2 h. At completion of the reaction, the reaction was exposed to the air and the solvent was evaporated. The hydroborated product was detected by GC-MS, and then the crude reaction mixture was purified through flash column chromatography with  $\text{SiO}_2$  using ethyl acetate/hexane (1:5, v/v) as eluent. Colorless oil of **4h** was isolated. Yield: 92.6 mg (85%).  $^1\text{H}$  NMR (600 MHz,  $\text{CDCl}_3$ )  $\delta$  8.36 (d,  $J = 5.9$  Hz, 2H), 7.23 (d,  $J = 5.8$  Hz, 2H), 5.26–3.86 (br. 1H, overlapping,  $\text{H}^{\text{OH}}$ ), 4.66 (s, 2H) ppm;  $^{13}\text{C}$  NMR (151 MHz,  $\text{CDCl}_3$ )  $\delta$  151.7, 149.4, 121.6, 63.1 ppm.

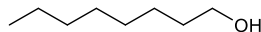

Chemical Formula:  $\text{C}_8\text{H}_{18}\text{O}$   
Molecular Weight: 130.2310

**4i:**<sup>4</sup> In a glovebox under nitrogen atmosphere, CP **1** (0.44 mg, 1.0  $\mu\text{mol}$ , based on  $\text{Mn}(\text{L})\text{Cl}_2$ ) and  $\text{KO}^t\text{Bu}$  (1.1 mg, 10  $\mu\text{mol}$ ) was dissolved in THF (1.0 mL) in a 3.8 mL glass vial equipped with a stir bar. 1-Octanol (128.0 mg, 1.0 mmol) and pinacolborane (140.8 mg, 1.1 mmol) were then added. The reaction mixture was allowed to stir at room temperature for 2 h. At completion of the reaction, the reaction was exposed to the air and the solvent was evaporated. The hydroborated product was detected by GC-MS, and then the crude reaction mixture was purified through flash column chromatography with  $\text{SiO}_2$  using ethyl acetate/hexane (1:10, v/v) as eluent. Colorless oil of **4i** was isolated. Yield: 113.2 mg (87%).  $^1\text{H}$  NMR (600 MHz,  $\text{CDCl}_3$ )  $\delta$  3.74 – 3.47 (m, 2H), 2.01 (s, 1H), 1.54 (dt,  $J = 15.1, 6.8$  Hz, 2H), 1.45 – 1.01 (m, 10H), 0.89 – 0.79 (m, 3H) ppm;  $^{13}\text{C}$  NMR (151 MHz,  $\text{CDCl}_3$ )  $\delta$  63.2, 33.0, 32.1, 29.7, 29.6, 26.0, 22.9, 14.4 ppm.

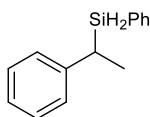

Chemical Formula:  $\text{C}_{14}\text{H}_{16}\text{Si}$   
Molecular Weight: 212.3670

**5a:**<sup>5</sup> In a glovebox under nitrogen atmosphere, CP **1** (0.44 mg, 1.0  $\mu\text{mol}$ , based on  $\text{Mn}(\text{L})\text{Cl}_2$ ) and  $\text{KO}^t\text{Bu}$  (1.1 mg, 10  $\mu\text{mol}$ ) was loaded in a 3.8 mL glass vial equipped with a stir bar. Styrene (104.0 mg, 1.0 mmol) and phenylsilane (130.0 mg, 1.2 mmol) were then added. The neat mixture was allowed to stir at room temperature for 80 min. At completion of the reaction, the reaction was exposed to the air and the solvent was evaporated. The hydrosilylated product was detected by GC-MS, and then the crude reaction mixture was purified through flash column chromatography with  $\text{SiO}_2$  using ethyl acetate/hexane (1:10, v/v) as eluent. Colorless oil of **5a** was isolated. Yield: 191.1 mg (90%).  $^1\text{H}$  NMR (400 MHz,  $\text{CDCl}_3$ )  $\delta$  7.57 – 7.47 (m, 3H), 7.46 – 7.34 (m, 4H), 7.29 – 7.19 (m, 3H), 4.49 (s, 2H), 2.80 – 2.71 (m, 1H), 1.60 (d,  $J = 7.5$  Hz, 3H) ppm;  $^{13}\text{C}$  NMR (101 MHz,  $\text{CDCl}_3$ )  $\delta$  144.9, 136.0, 131.7, 130.1, 128.7, 128.2, 127.5, 125.4, 25.7, 16.7 ppm.

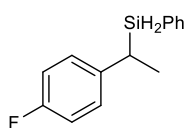

Chemical Formula:  $\text{C}_{14}\text{H}_{15}\text{FSi}$   
Molecular Weight: 230.3574

**5b:**<sup>5</sup> In a glovebox under nitrogen atmosphere, CP **1** (0.44 mg, 1.0  $\mu\text{mol}$ , based on  $\text{Mn}(\text{L})\text{Cl}_2$ ) and  $\text{KO}^t\text{Bu}$  (1.1 mg, 10  $\mu\text{mol}$ ) was loaded in a 3.8 mL glass vial equipped with a stir bar. Styrene (104.0 mg, 1.0 mmol) and phenylsilane (130.0 mg, 1.2 mmol) were then added. The reaction mixture was allowed to stir at room temperature for 16. At completion of the

reaction, the reaction was exposed to the air and the solvent was evaporated. The hydrosilylated product was detected by GC-MS, and then the crude reaction mixture was purified through flash column chromatography with SiO<sub>2</sub> using ethyl acetate/hexane (1:10, v/v) as eluent. Colorless oil of **5b** was isolated. Yield: 133.4 mg (58%). <sup>1</sup>H NMR (500 MHz, CDCl<sub>3</sub>) δ 7.43 – 7.39 (m, 3H), 7.34 (dd, *J* = 7.7, 6.9 Hz, 2H), 7.05 (dd, *J* = 8.6, 5.5 Hz, 2H), 6.96 (t, *J* = 8.7 Hz, 2H), 4.33 (d, *J* = 3.2 Hz, 2H), 2.66 – 2.60 (m, 1H), 1.46 (d, *J* = 7.5 Hz, 3H) ppm; <sup>13</sup>C NMR (126 MHz, CDCl<sub>3</sub>) δ 161.21 (d, *J* = 219.3 Hz), 140.1, 135.6, 134.83 (d, *J* = 221.4 Hz), 131.1, 129.9, 128.3 (d, *J* = 7.7 Hz), 127.9, 115.11 (d, *J* = 21.1 Hz), 24.6, 16.6 ppm.

**NMR spectra for isolated products:**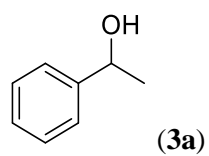

$^1\text{H}$  NMR (600 MHz,  $\text{CDCl}_3$ ):

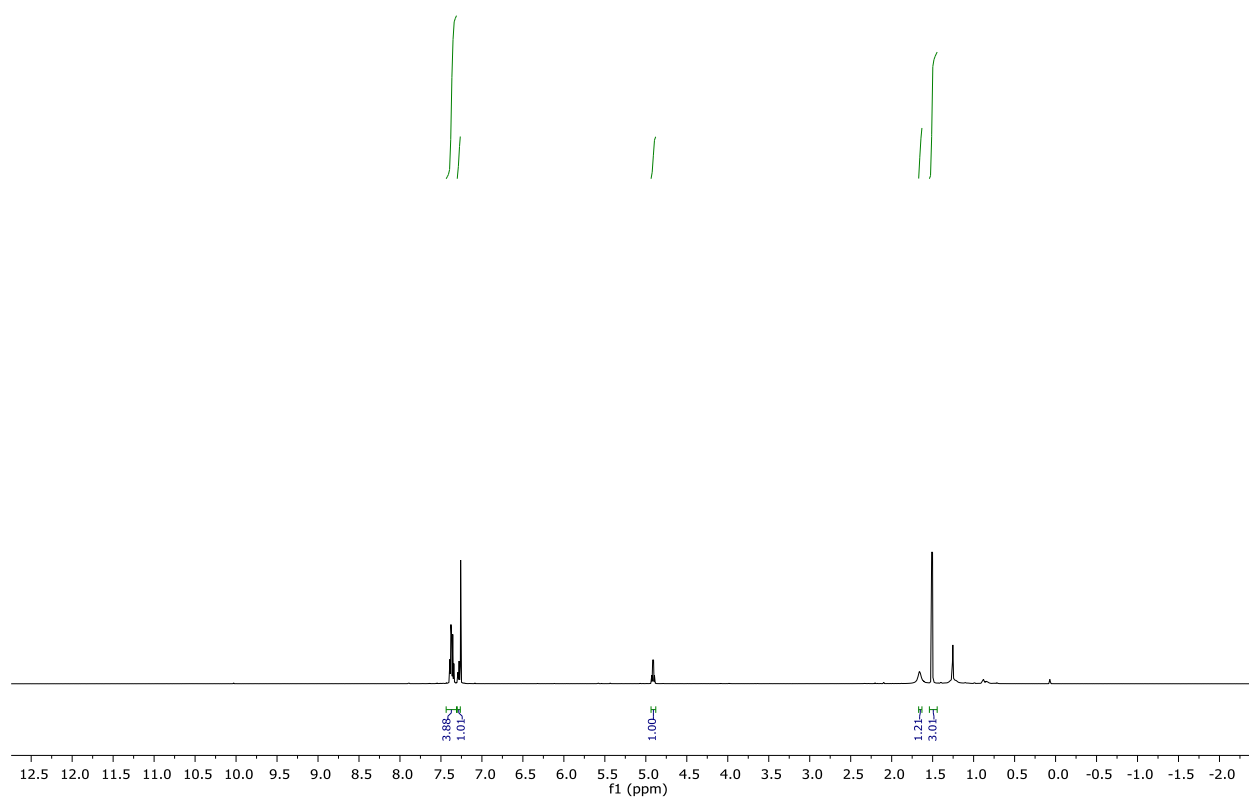

$^{13}\text{C}$  NMR (151 MHz,  $\text{CDCl}_3$ ):

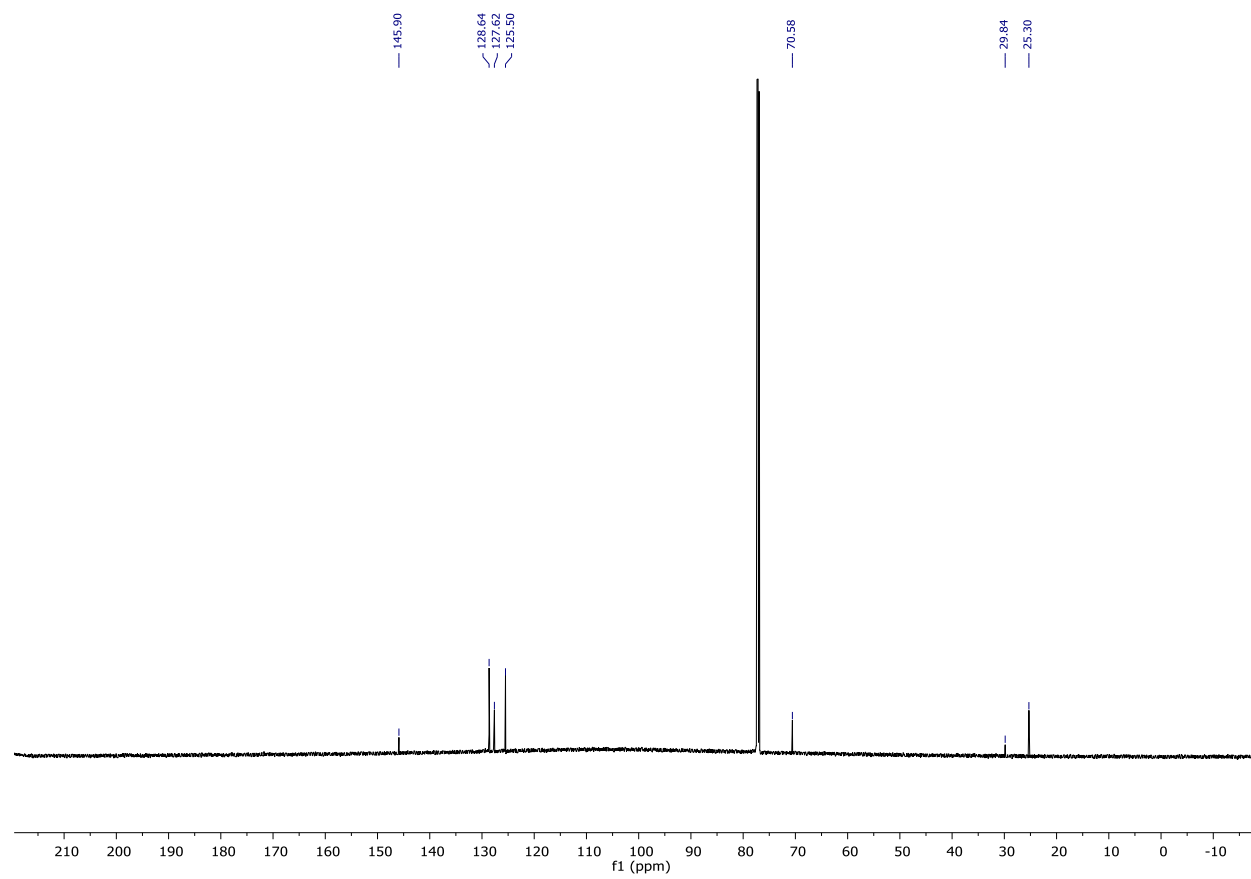

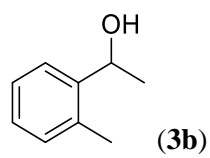

$^1\text{H}$  NMR (600 MHz,  $\text{CDCl}_3$ ):

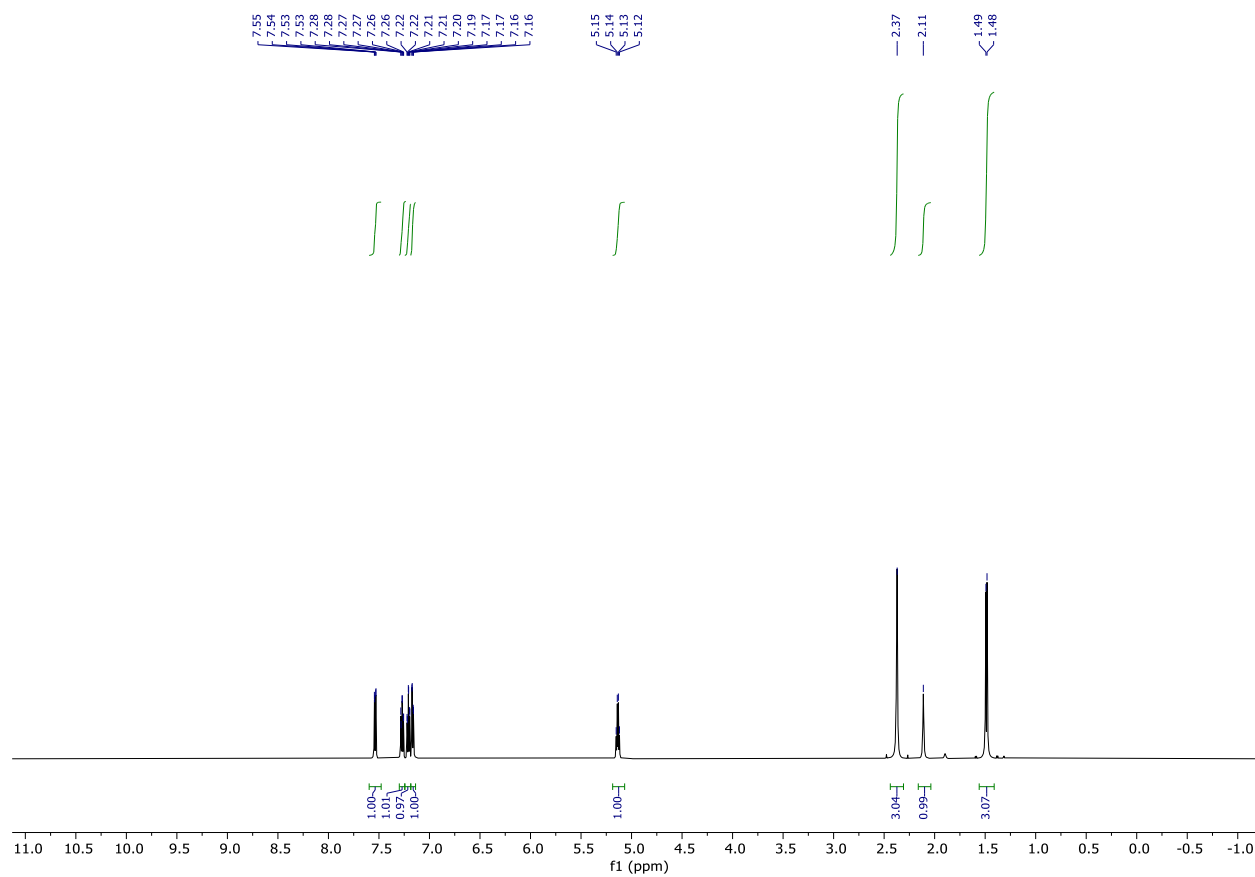

$^{13}\text{C}$  NMR (151MHz,  $\text{CDCl}_3$ ):

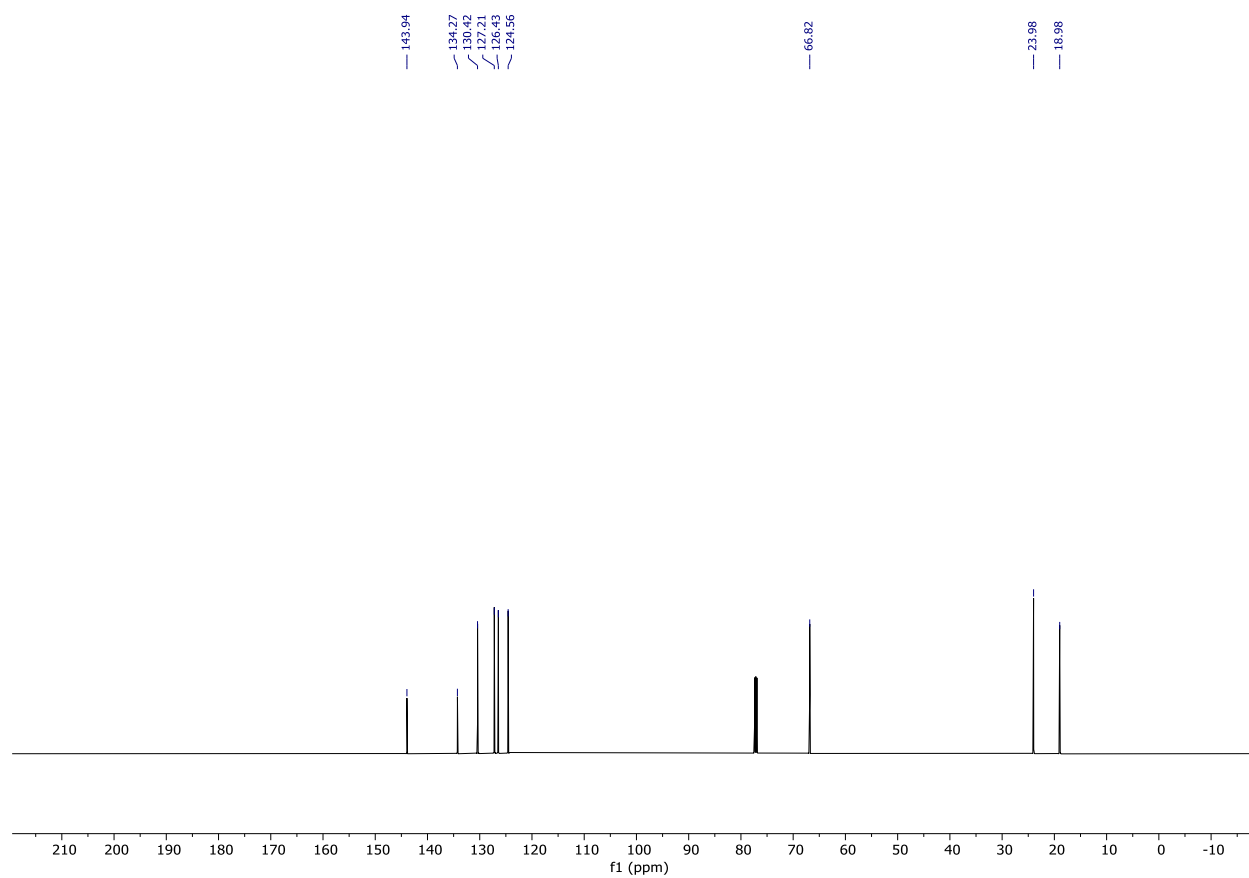

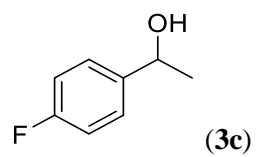

$^1\text{H}$  NMR (600 MHz,  $\text{CDCl}_3$ ):

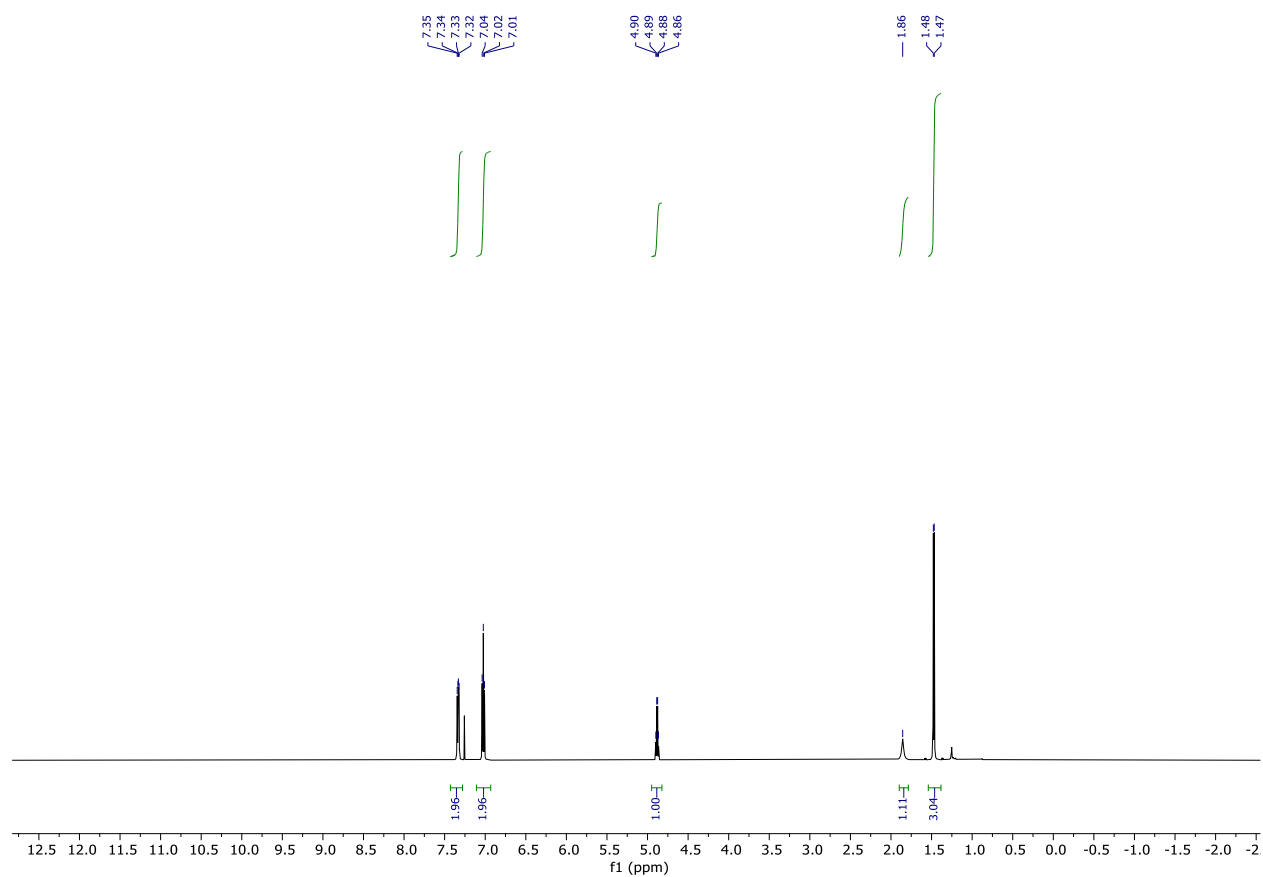

$^{13}\text{C}$  NMR (151MHz,  $\text{CDCl}_3$ ):

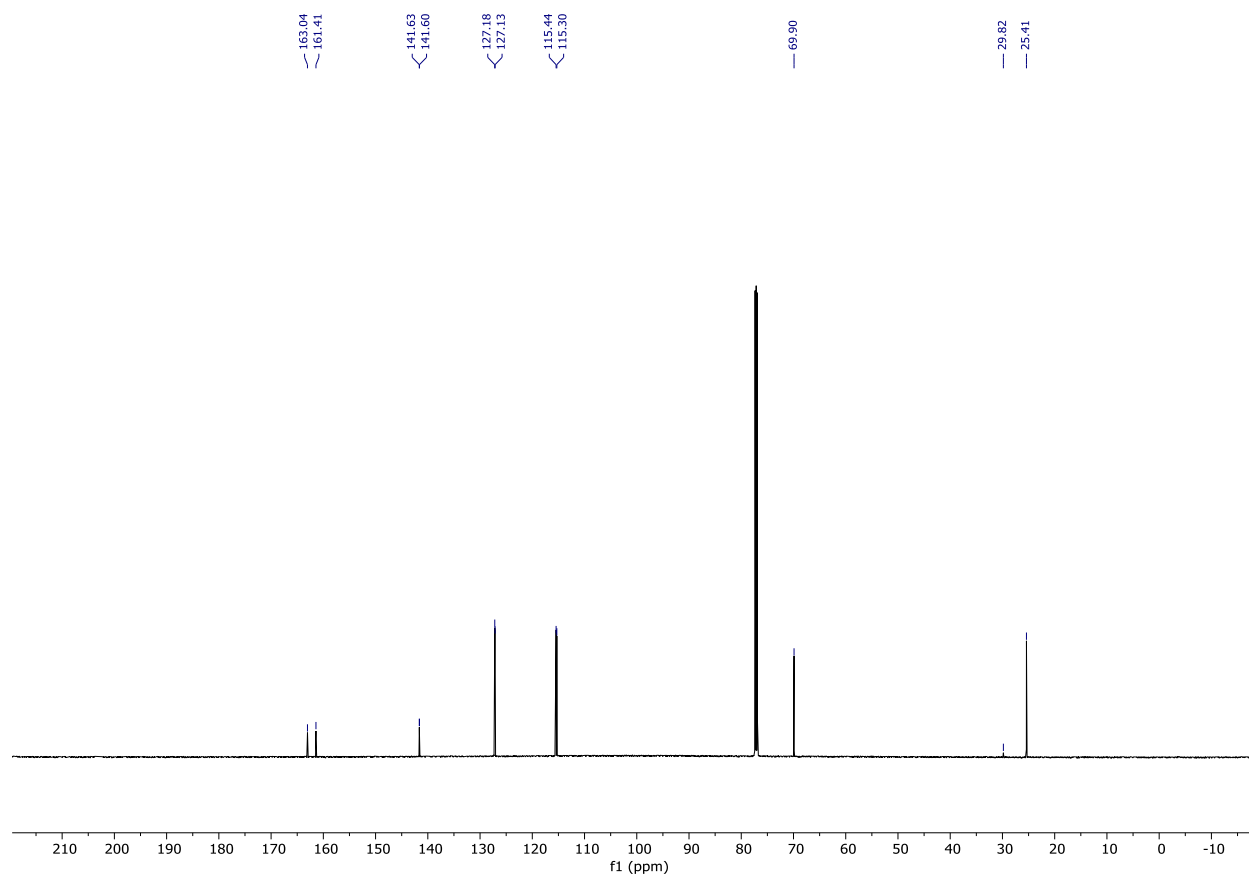

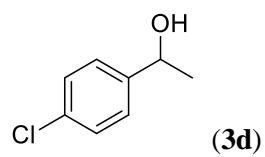

$^1\text{H}$  NMR (600 MHz,  $\text{CDCl}_3$ ):

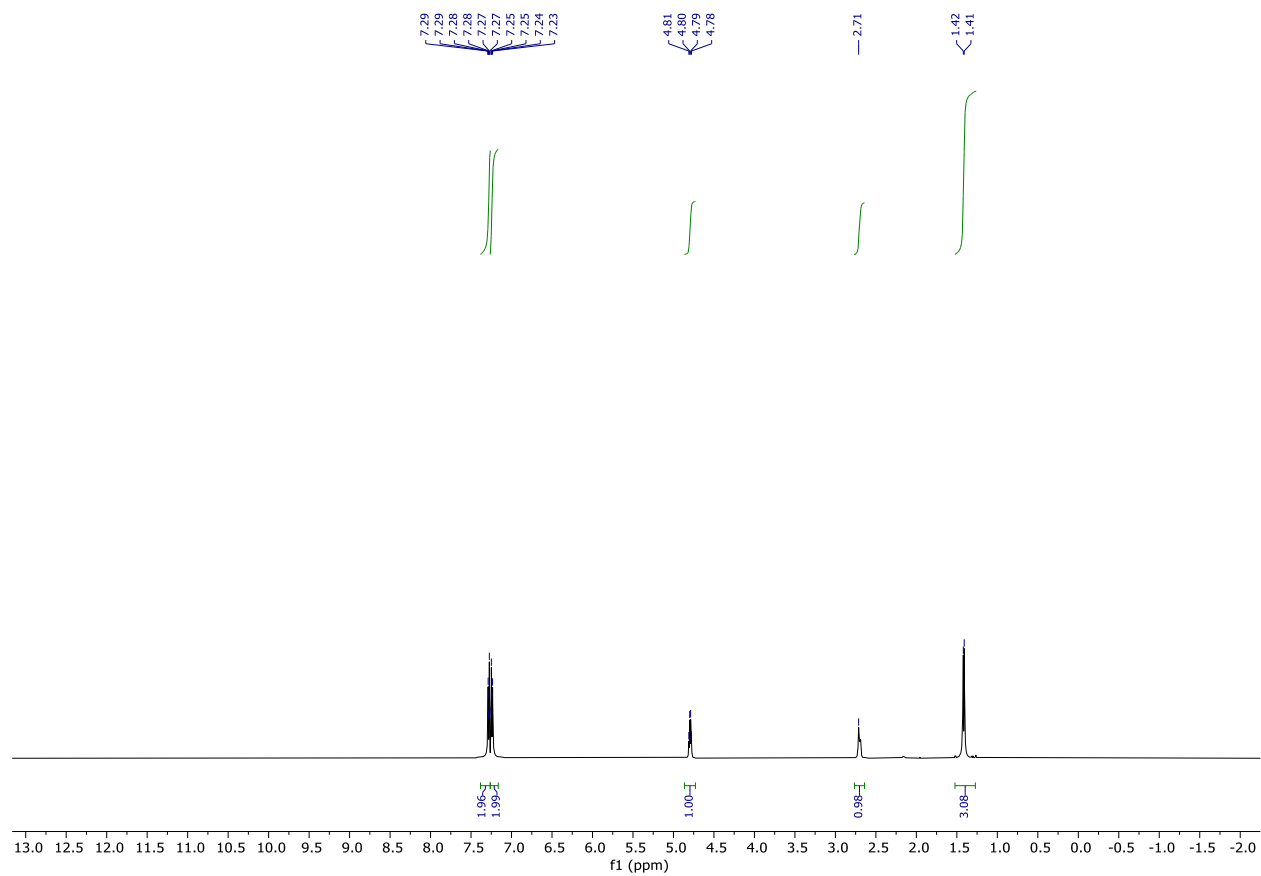

$^{13}\text{C}$  NMR (151 MHz,  $\text{CDCl}_3$ ):

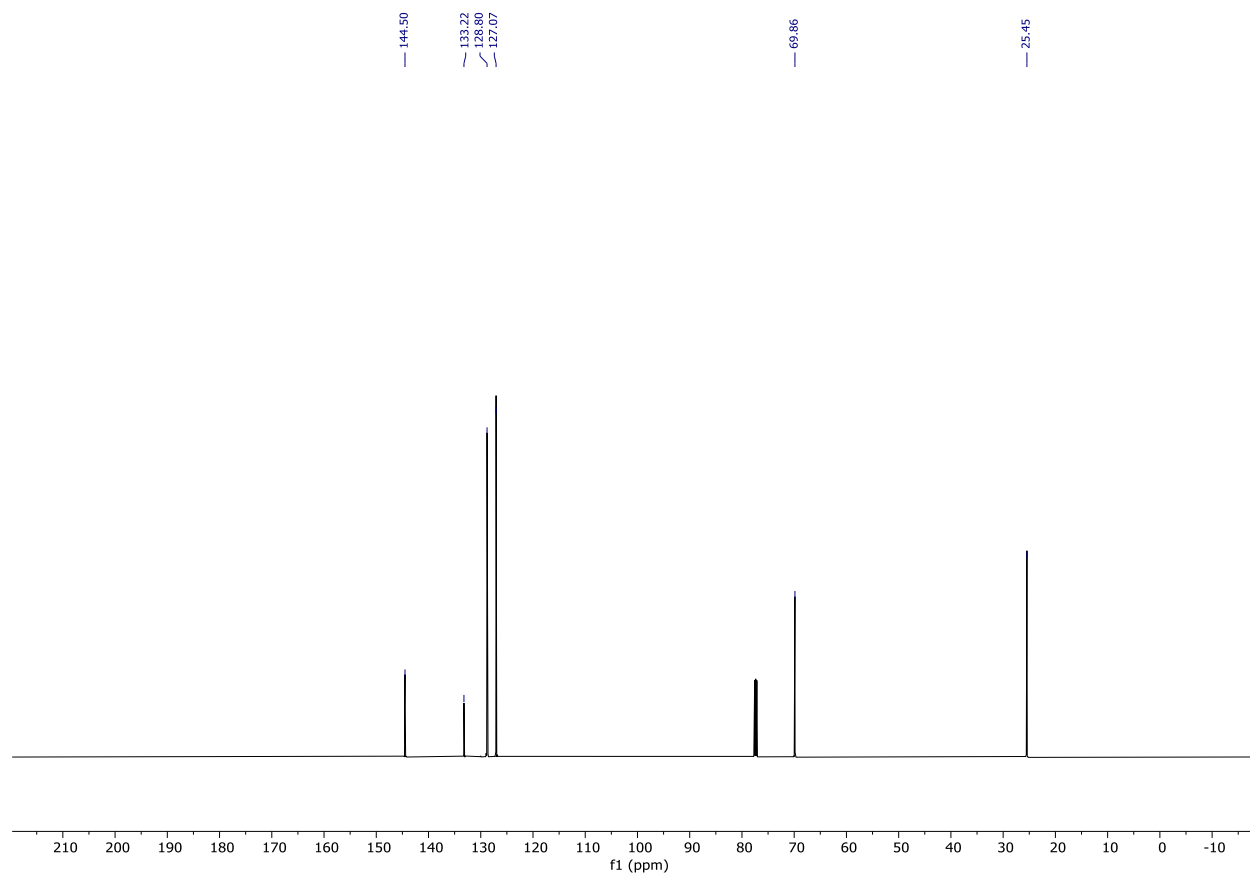

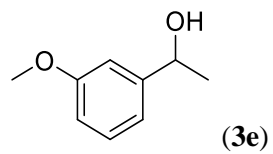

$^1\text{H}$  NMR (600 MHz,  $\text{CDCl}_3$ ):

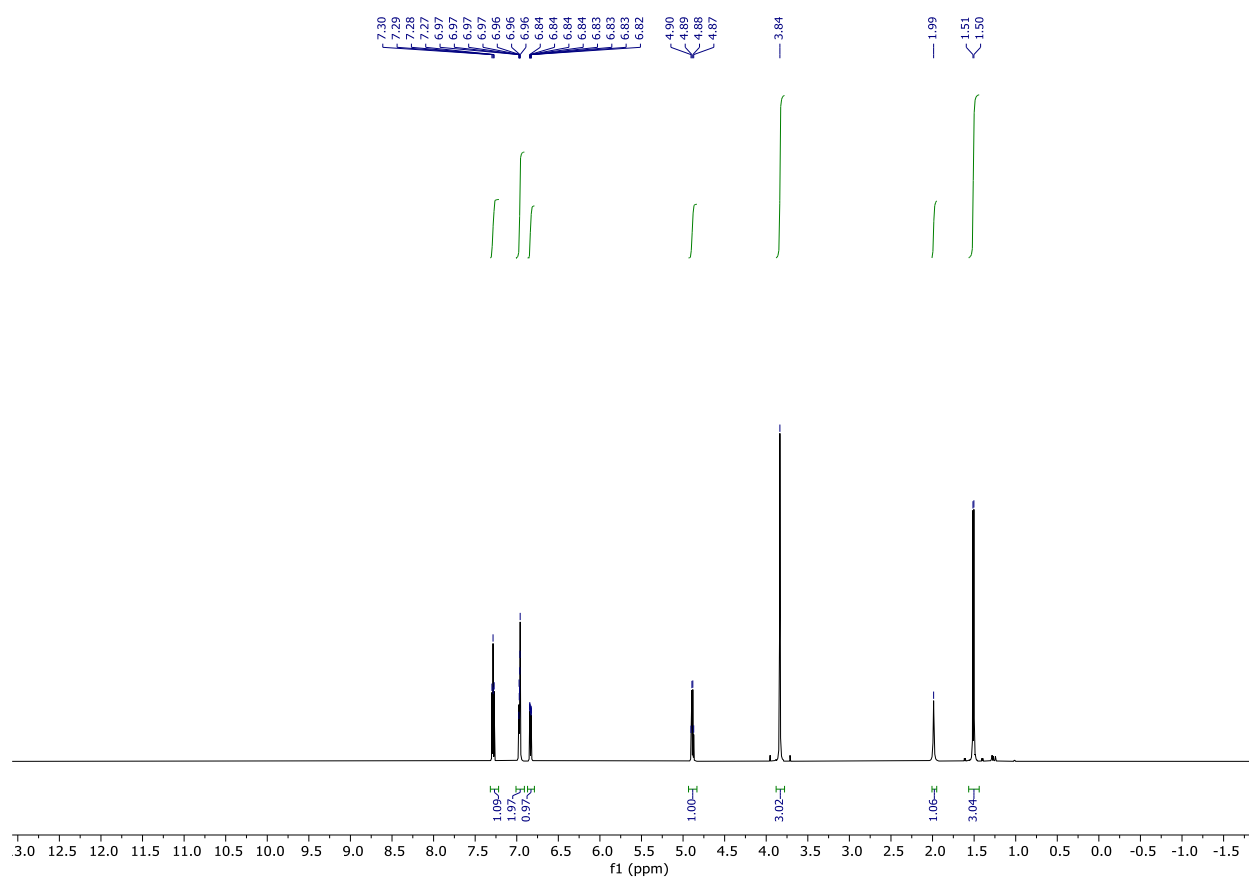

$^{13}\text{C}$  NMR (151 MHz,  $\text{CDCl}_3$ ):

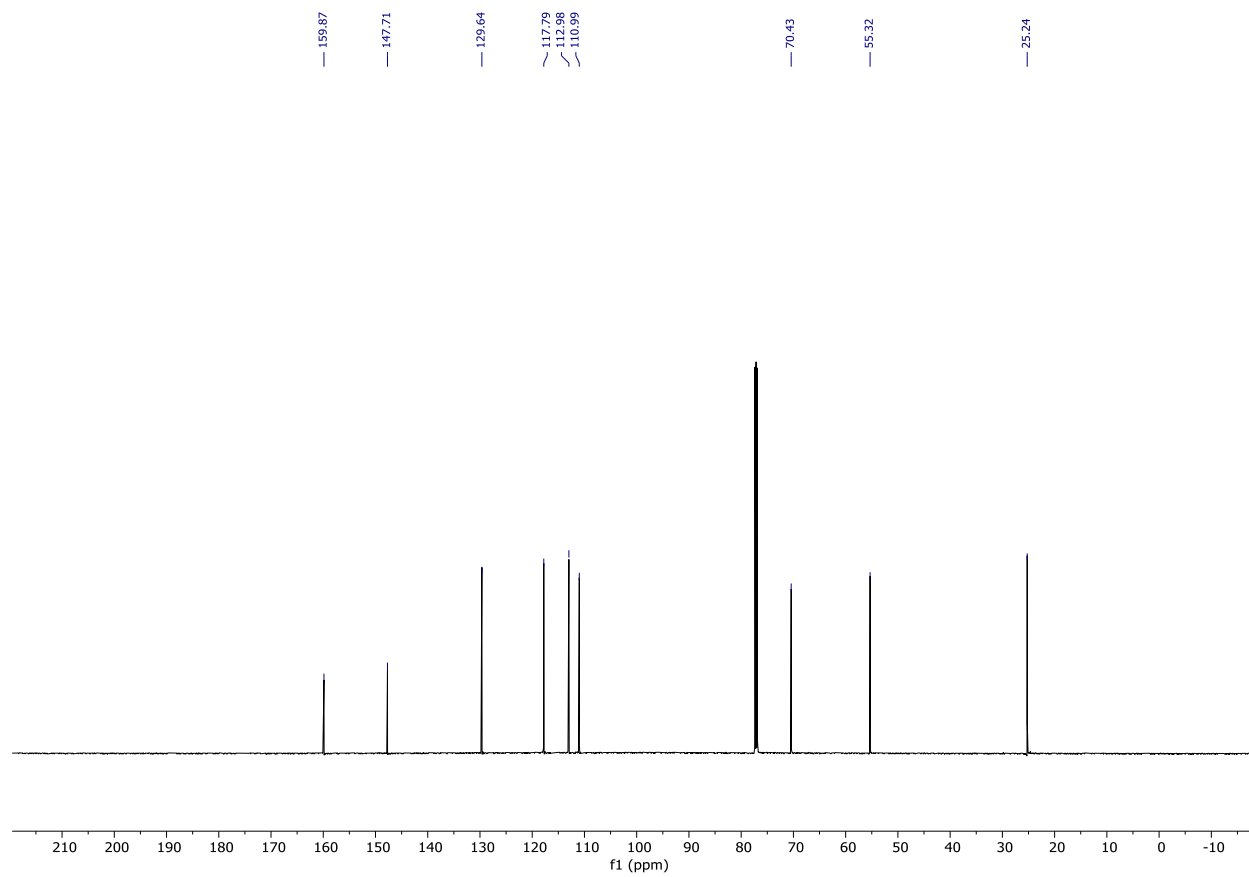

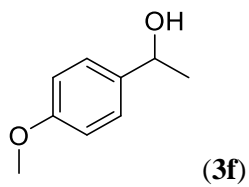

$^1\text{H}$  NMR (600 MHz,  $\text{CDCl}_3$ ):

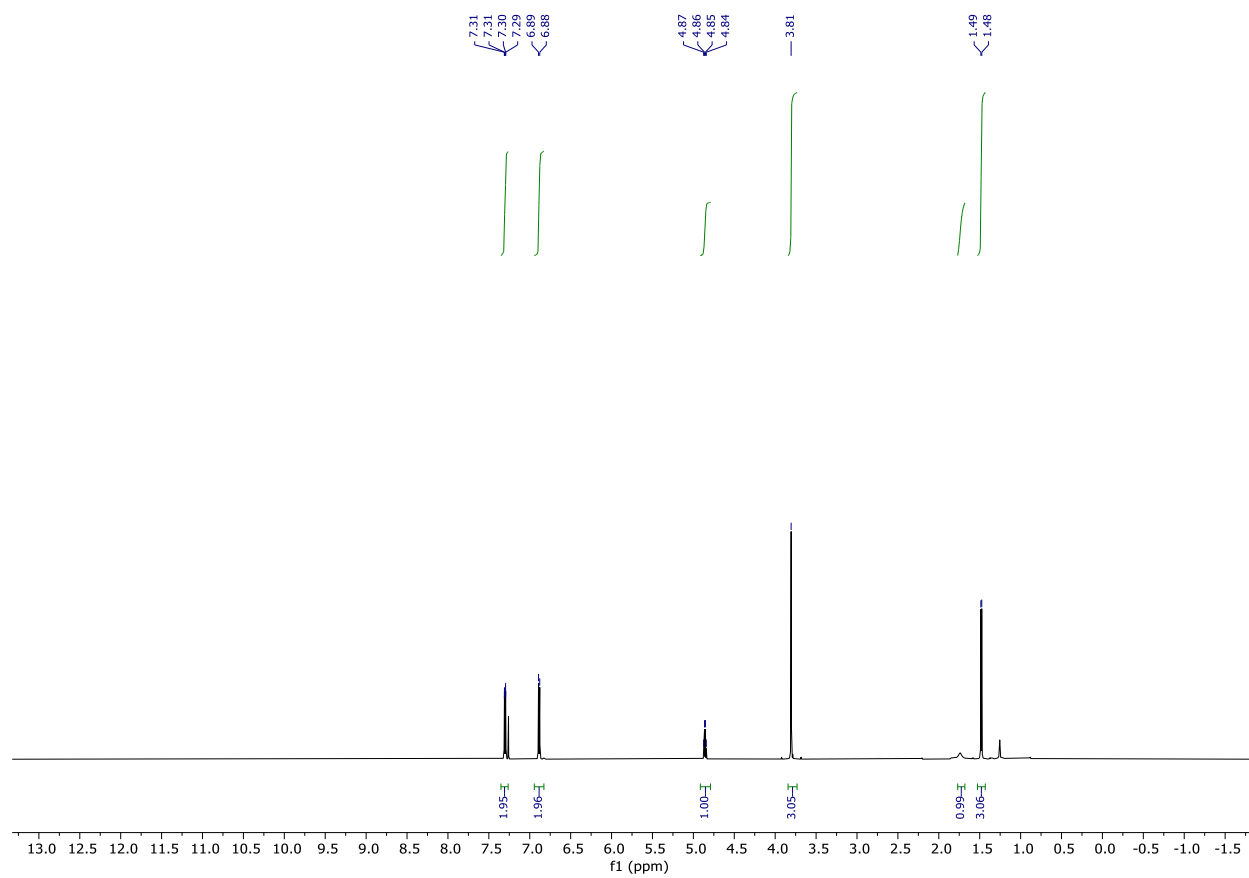

$^{13}\text{C}$  NMR (151 MHz,  $\text{CDCl}_3$ ):

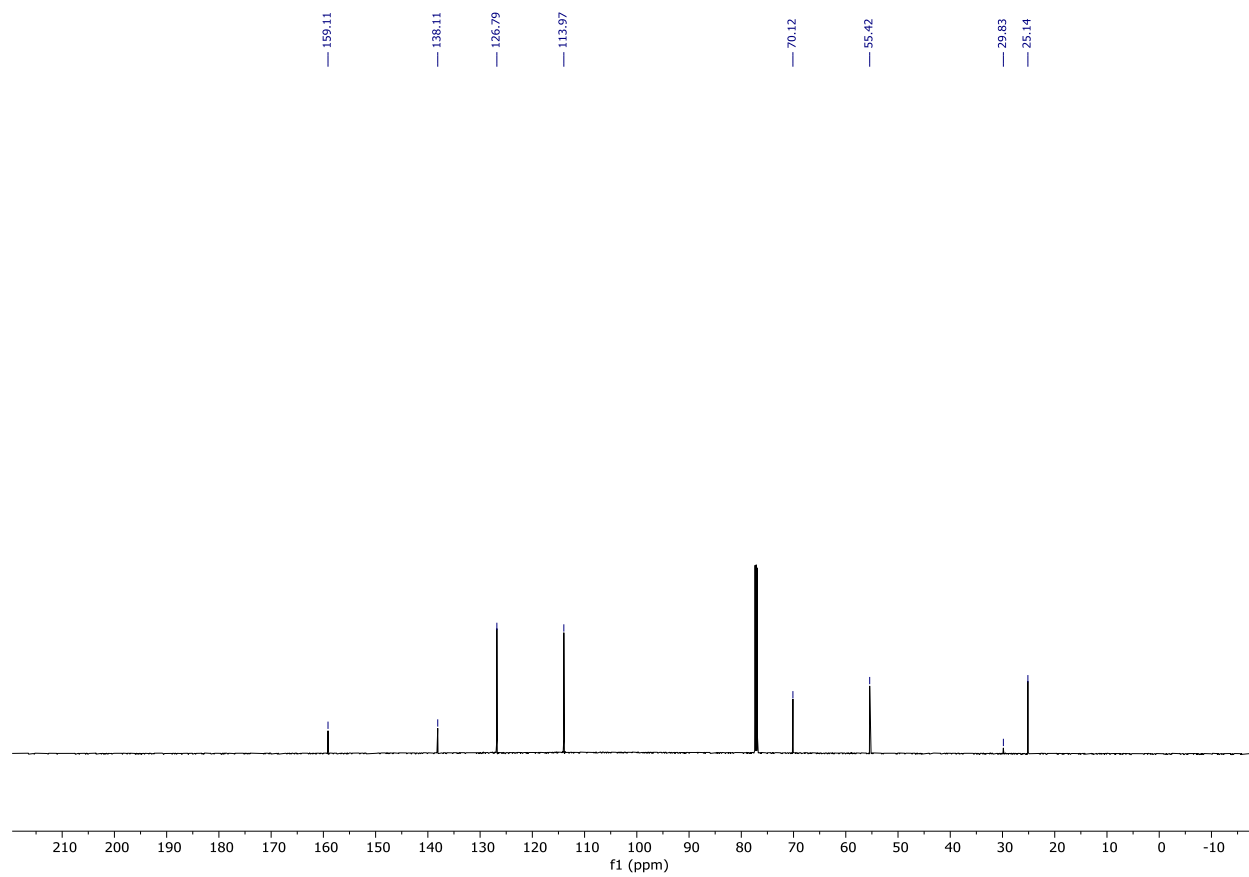

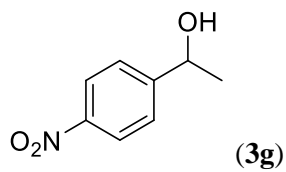

$^1\text{H}$  NMR (600 MHz,  $\text{CDCl}_3$ ):

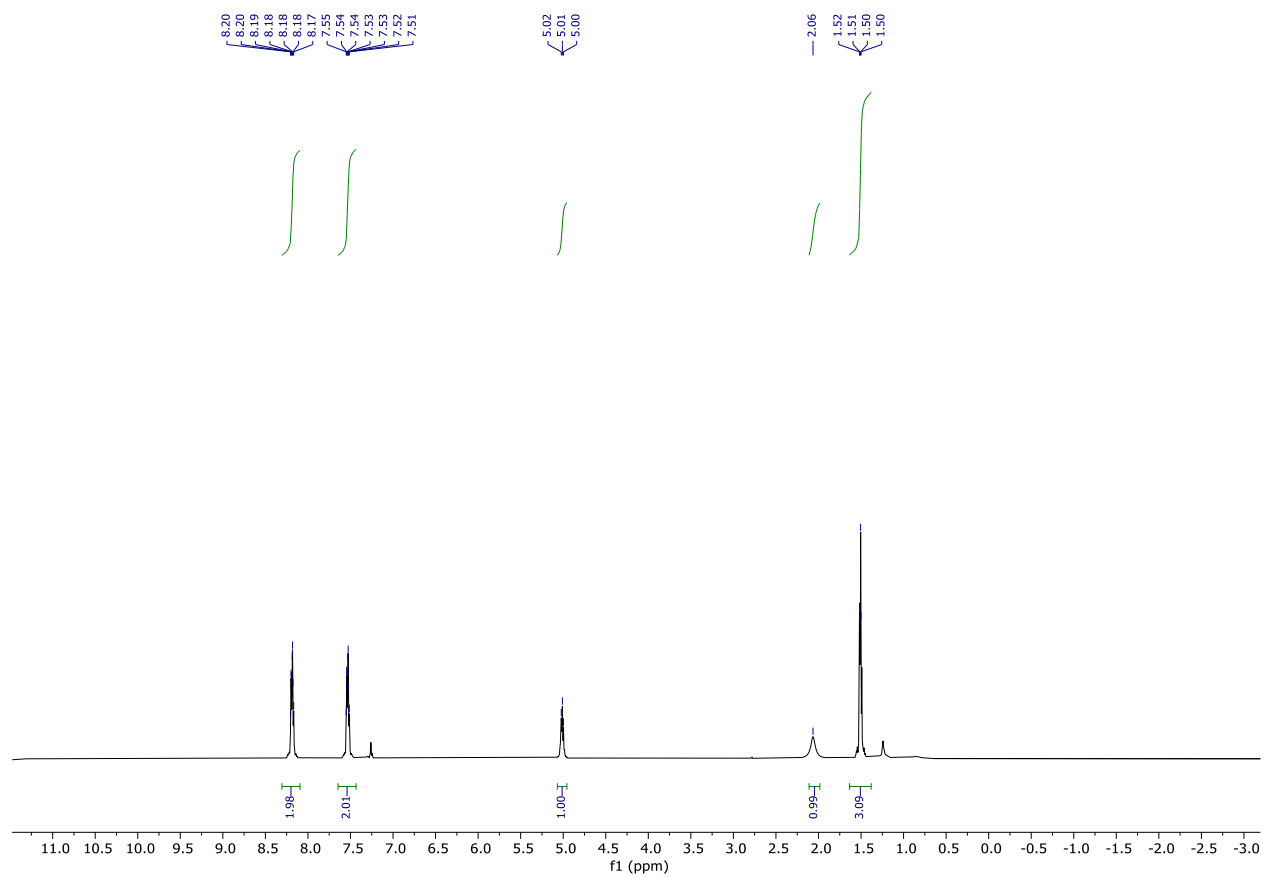

$^{13}\text{C}$  NMR (151 MHz,  $\text{CDCl}_3$ ):

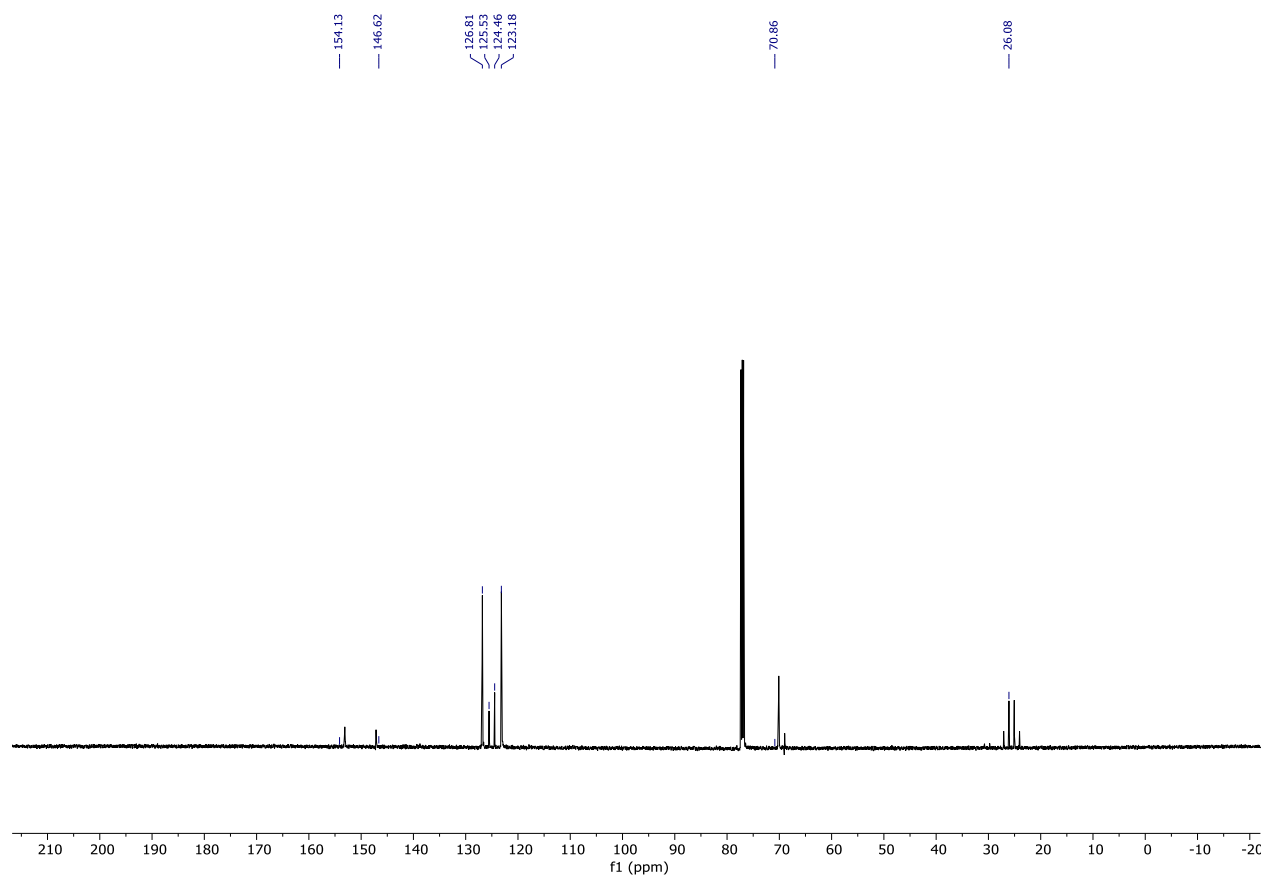

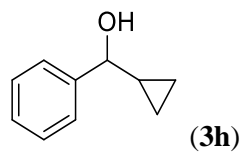

$^1\text{H}$  NMR (600 MHz,  $\text{CDCl}_3$ ):

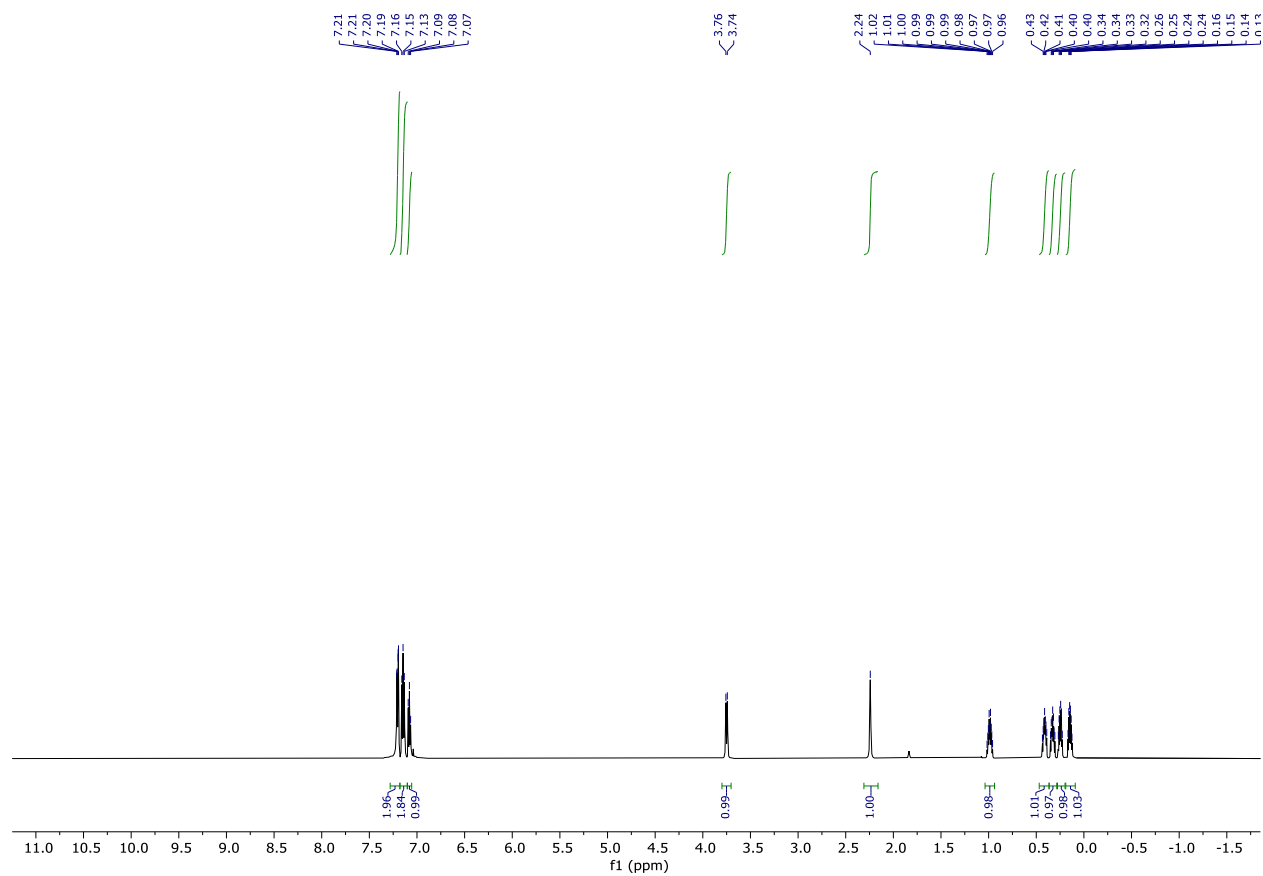

$^{13}\text{C}$  NMR (151 MHz,  $\text{CDCl}_3$ ):

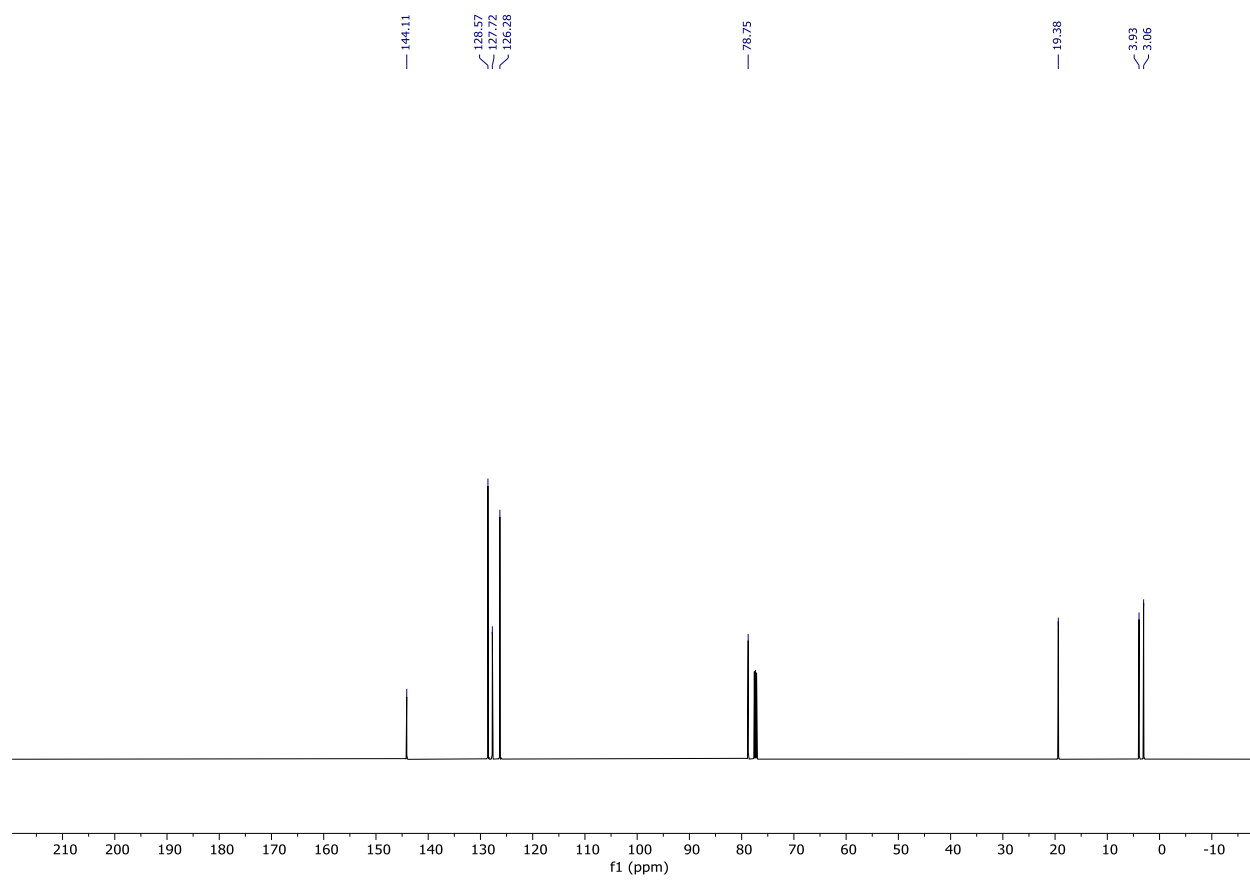

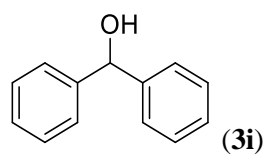

$^1\text{H}$  NMR (600 MHz,  $\text{CDCl}_3$ ):

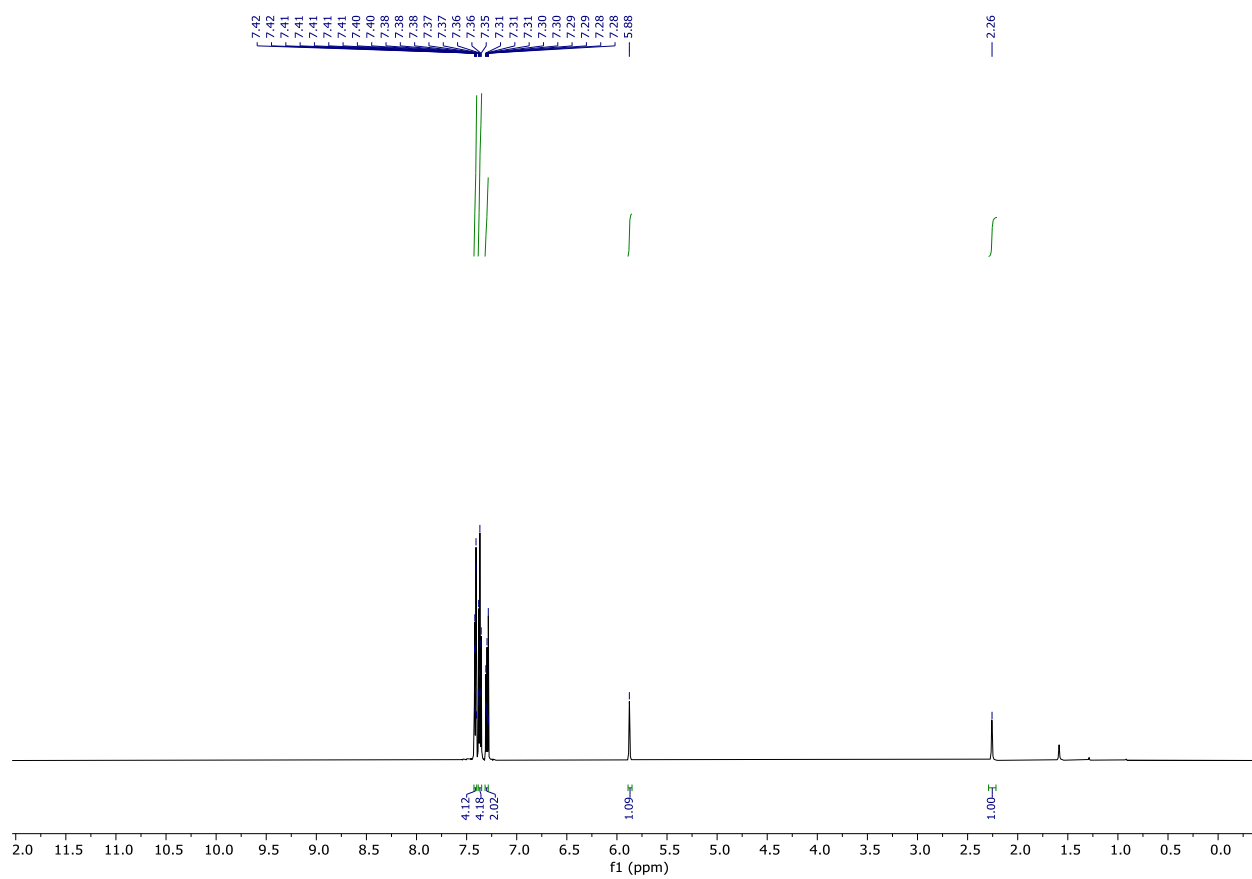

$^{13}\text{C}$  NMR (151 MHz,  $\text{CDCl}_3$ ):

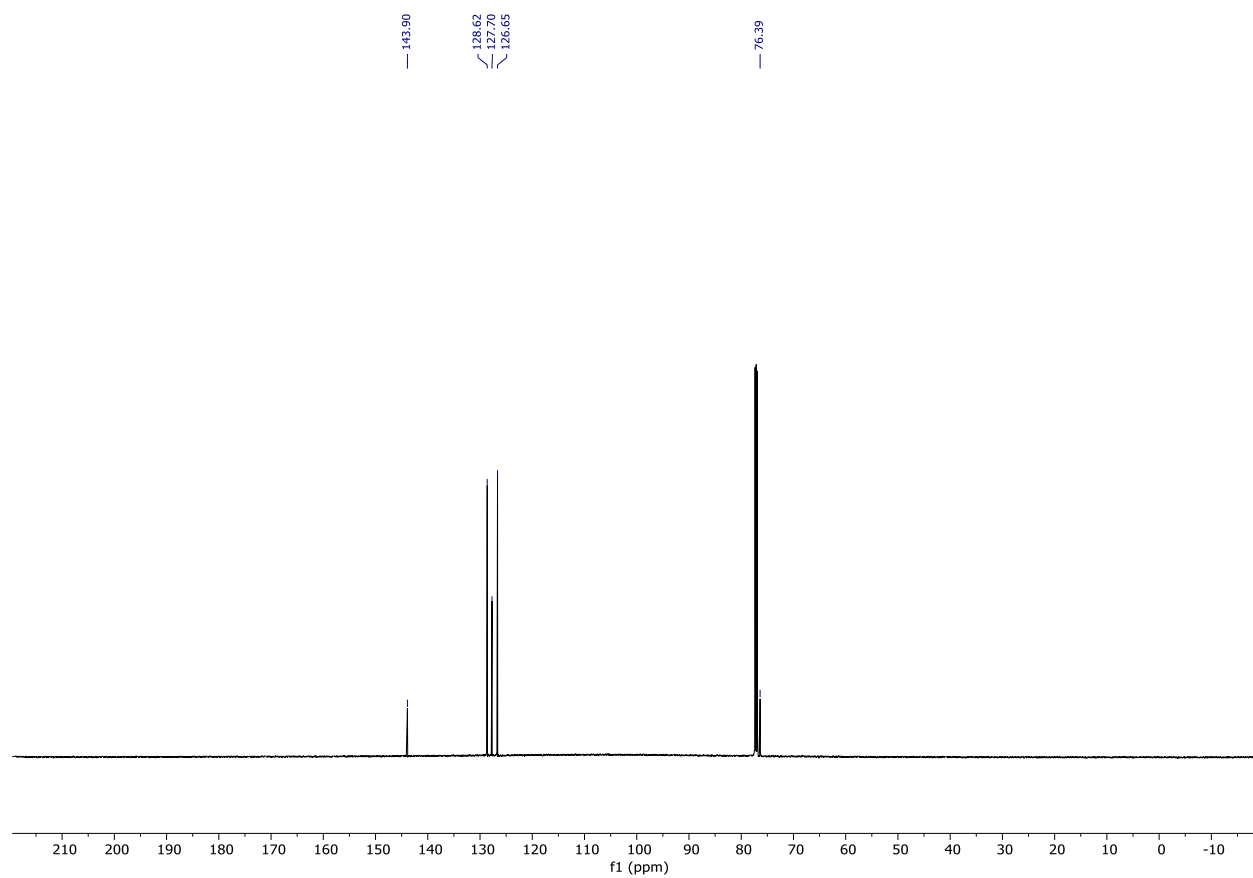

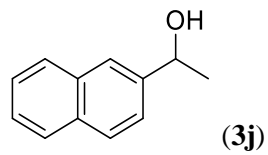

$^1\text{H}$  NMR (600 MHz,  $\text{CDCl}_3$ ):

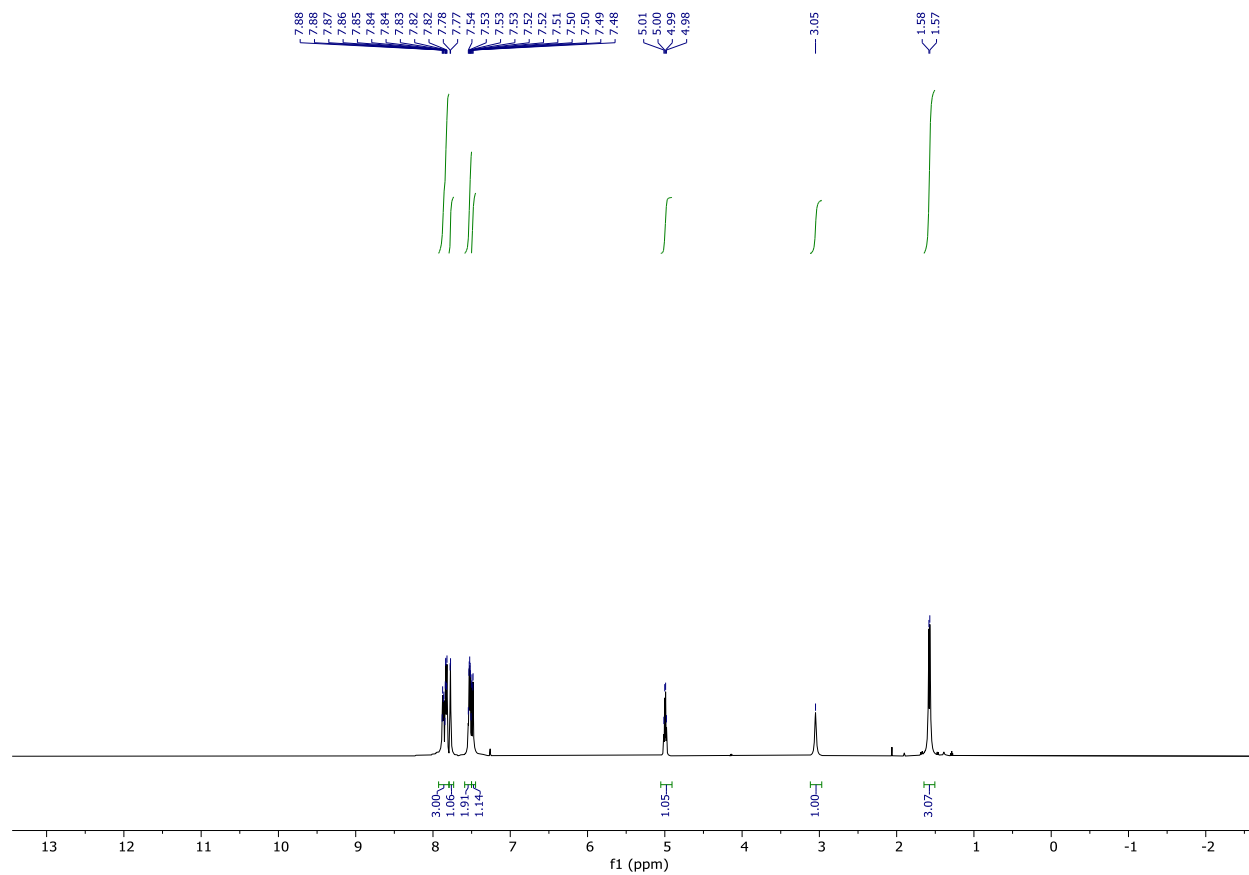

$^{13}\text{C}$  NMR (151 MHz,  $\text{CDCl}_3$ ):

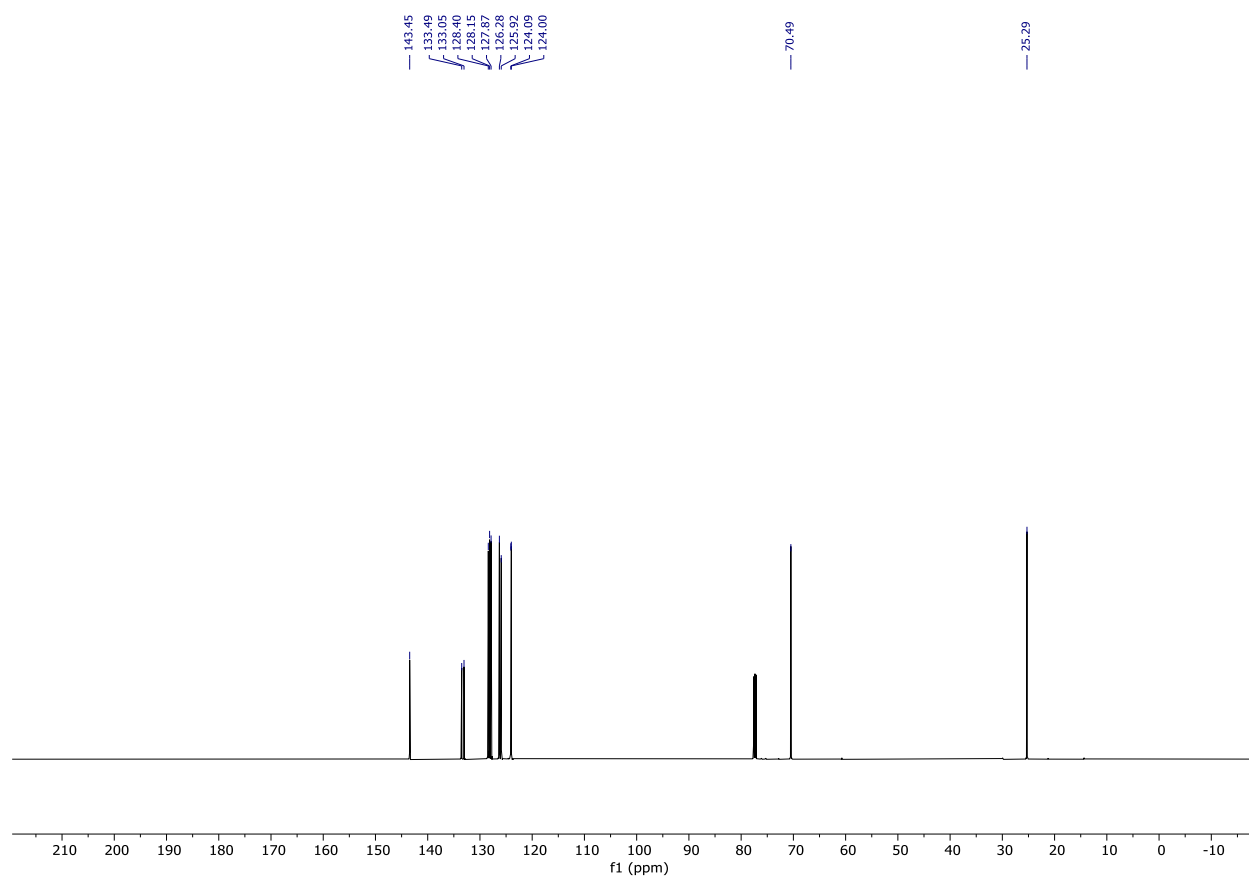

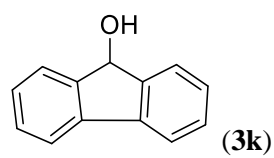

$^1\text{H}$  NMR (600 MHz,  $\text{CD}_3\text{OD}$ ):

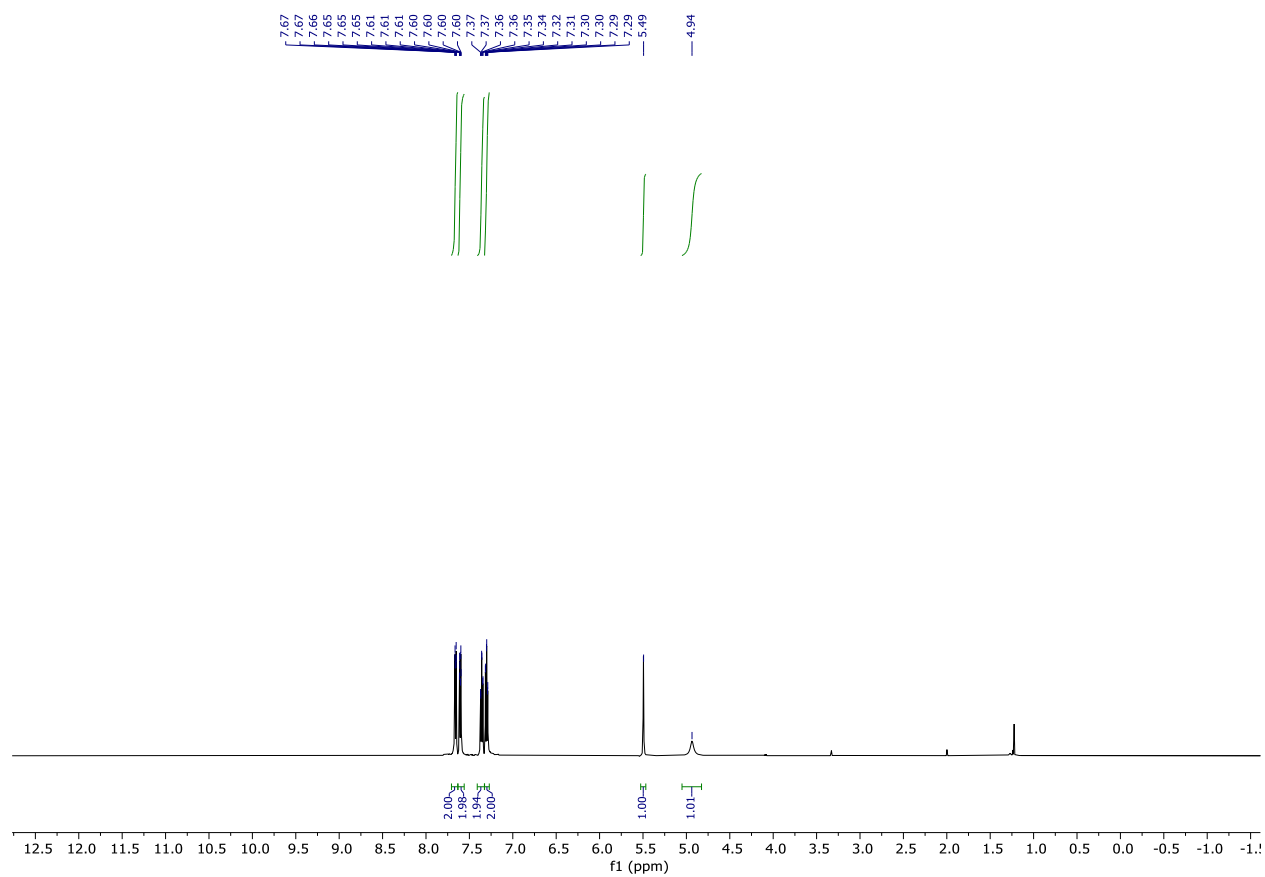

$^{13}\text{C}$  NMR (151 MHz,  $\text{CD}_3\text{OD}$ ):

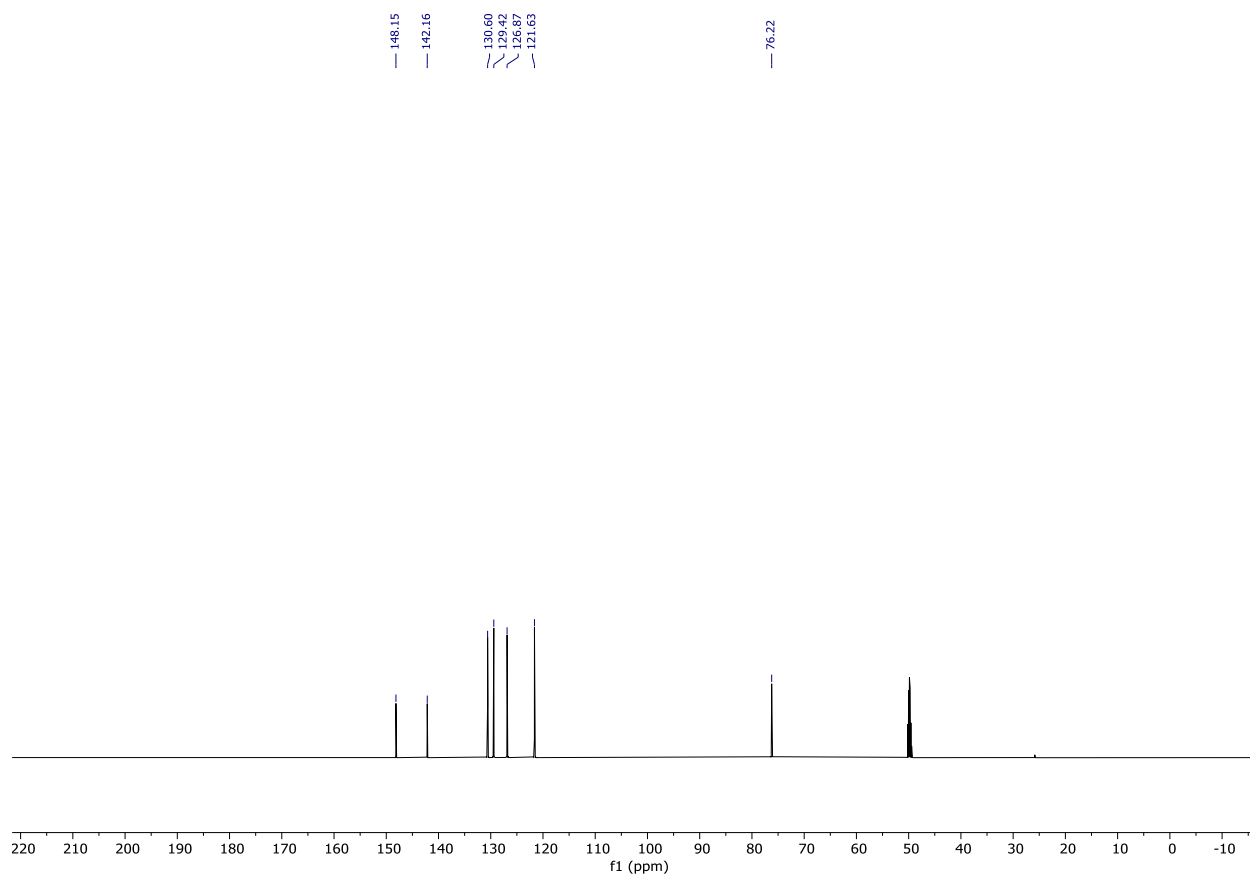

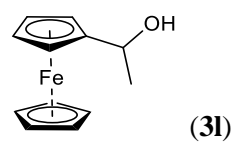

$^1\text{H}$  NMR (600 MHz,  $\text{CDCl}_3$ ):

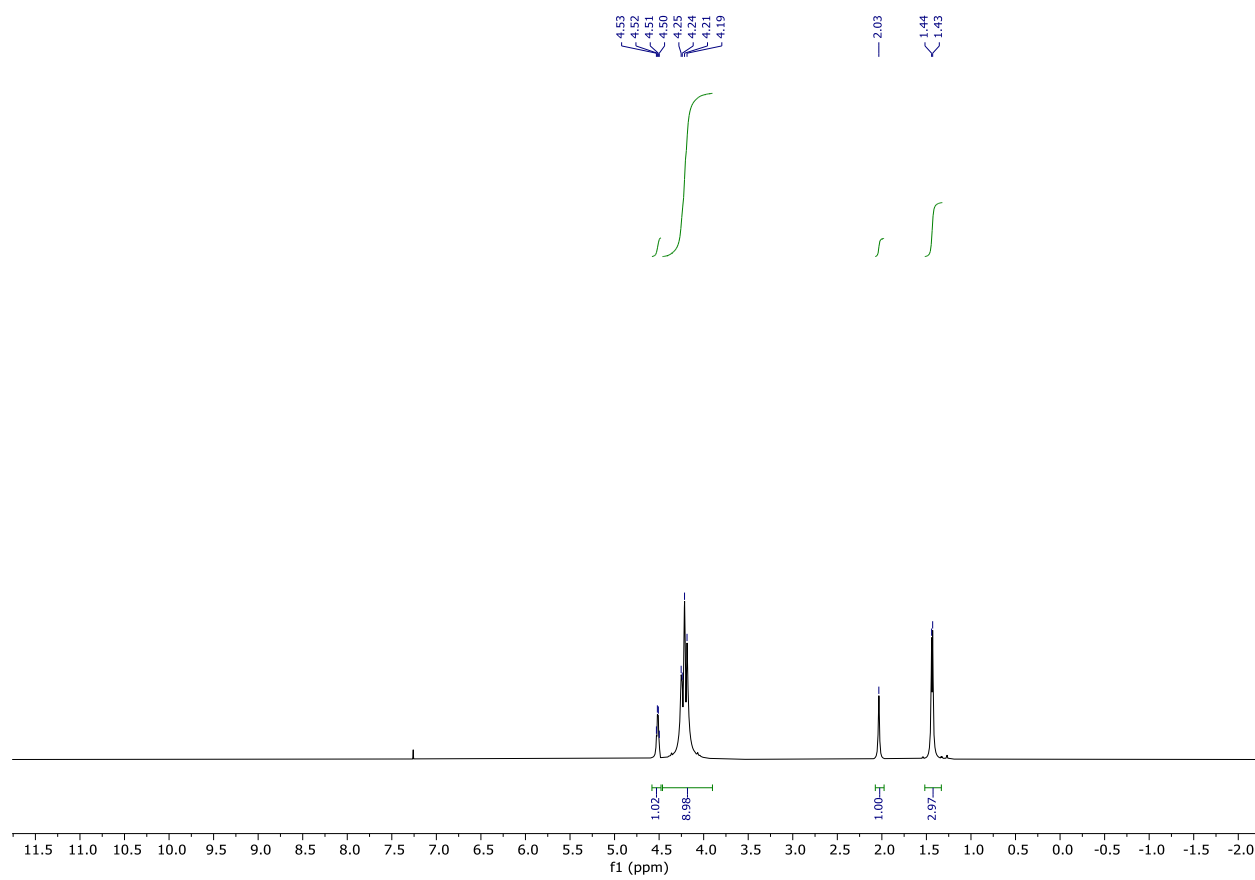

$^{13}\text{C}$  NMR (151 MHz,  $\text{CDCl}_3$ ):

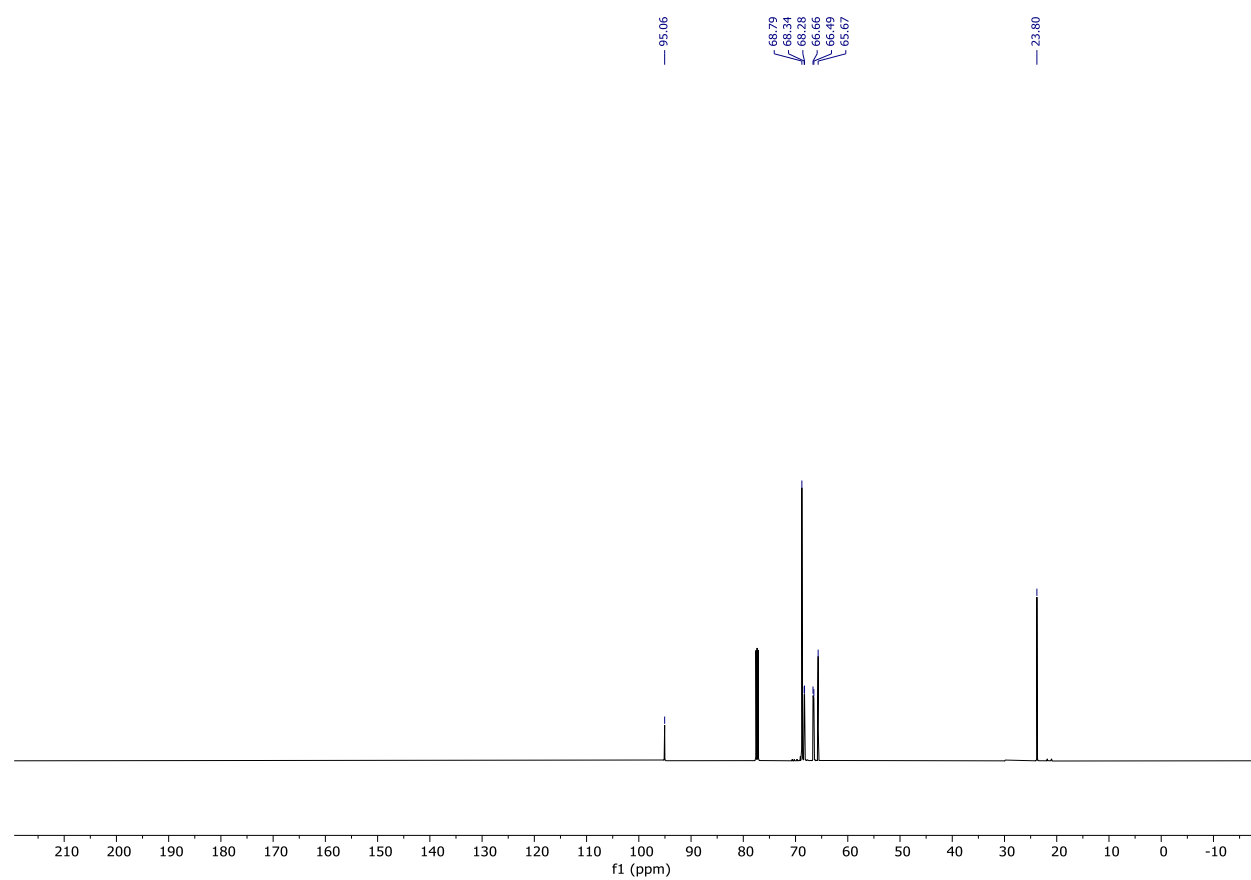

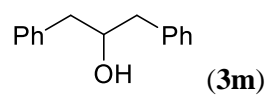

$^1\text{H}$  NMR (600 MHz,  $\text{CDCl}_3$ ):

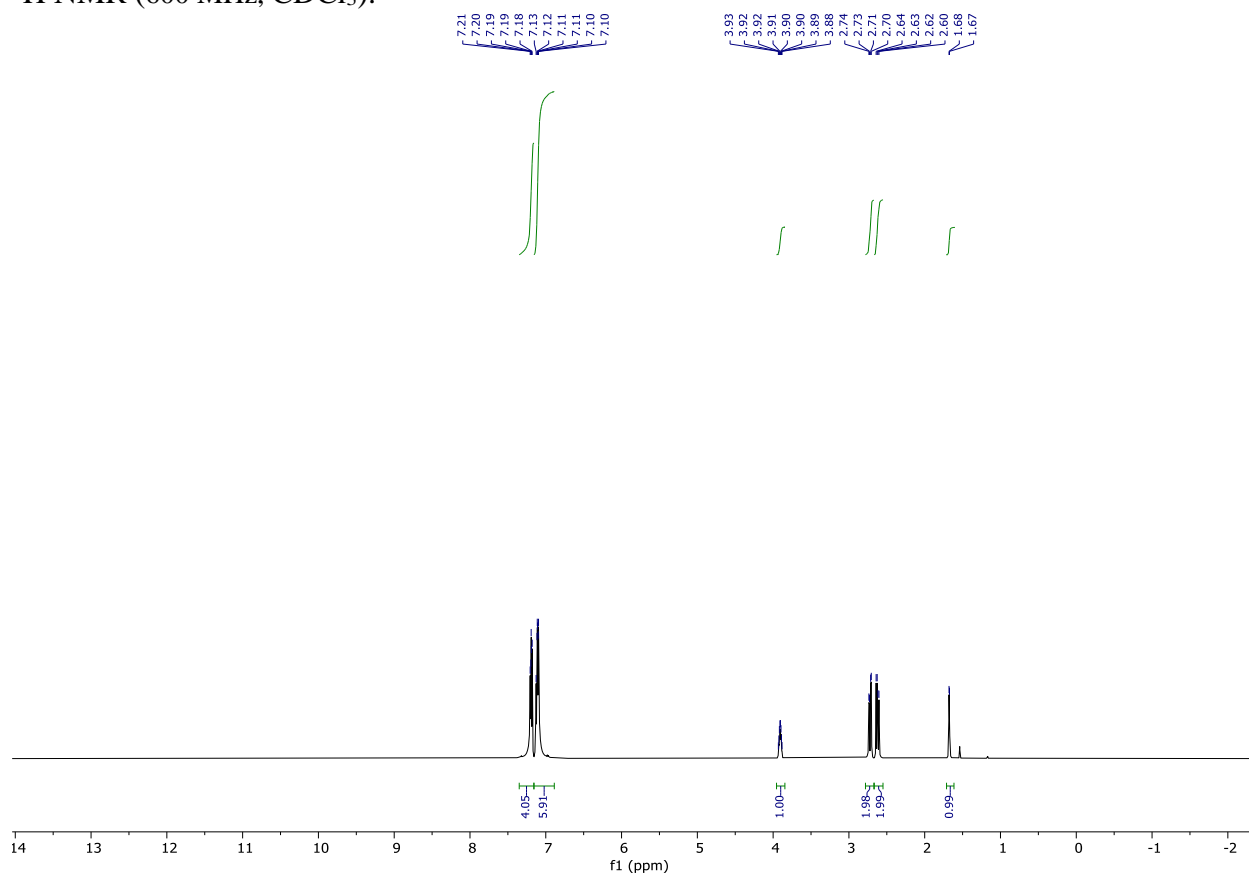

$^{13}\text{C}$  NMR (151 MHz,  $\text{CDCl}_3$ ):

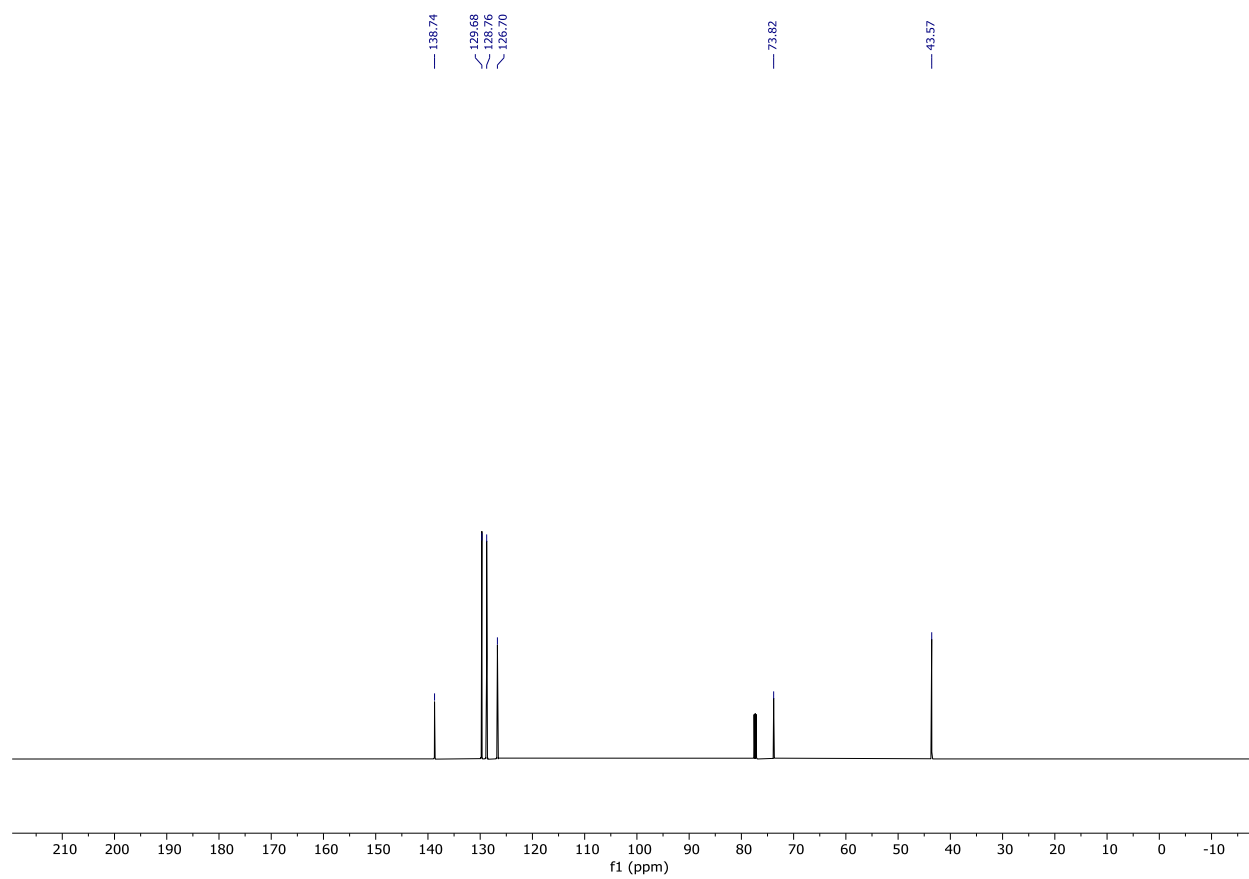

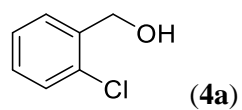

$^1\text{H}$  NMR (600 MHz,  $\text{CDCl}_3$ ):

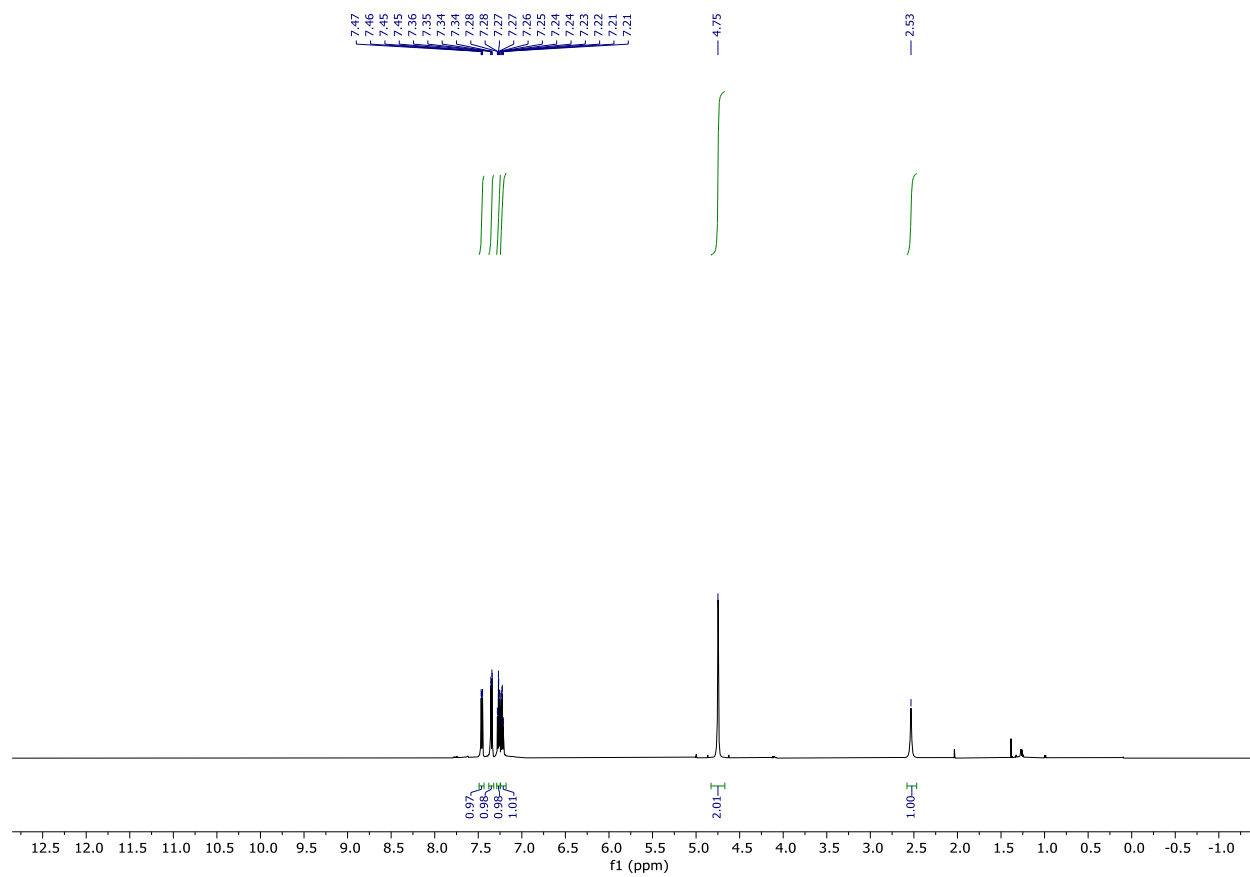

$^{13}\text{C}$  NMR (151 MHz,  $\text{CDCl}_3$ ):

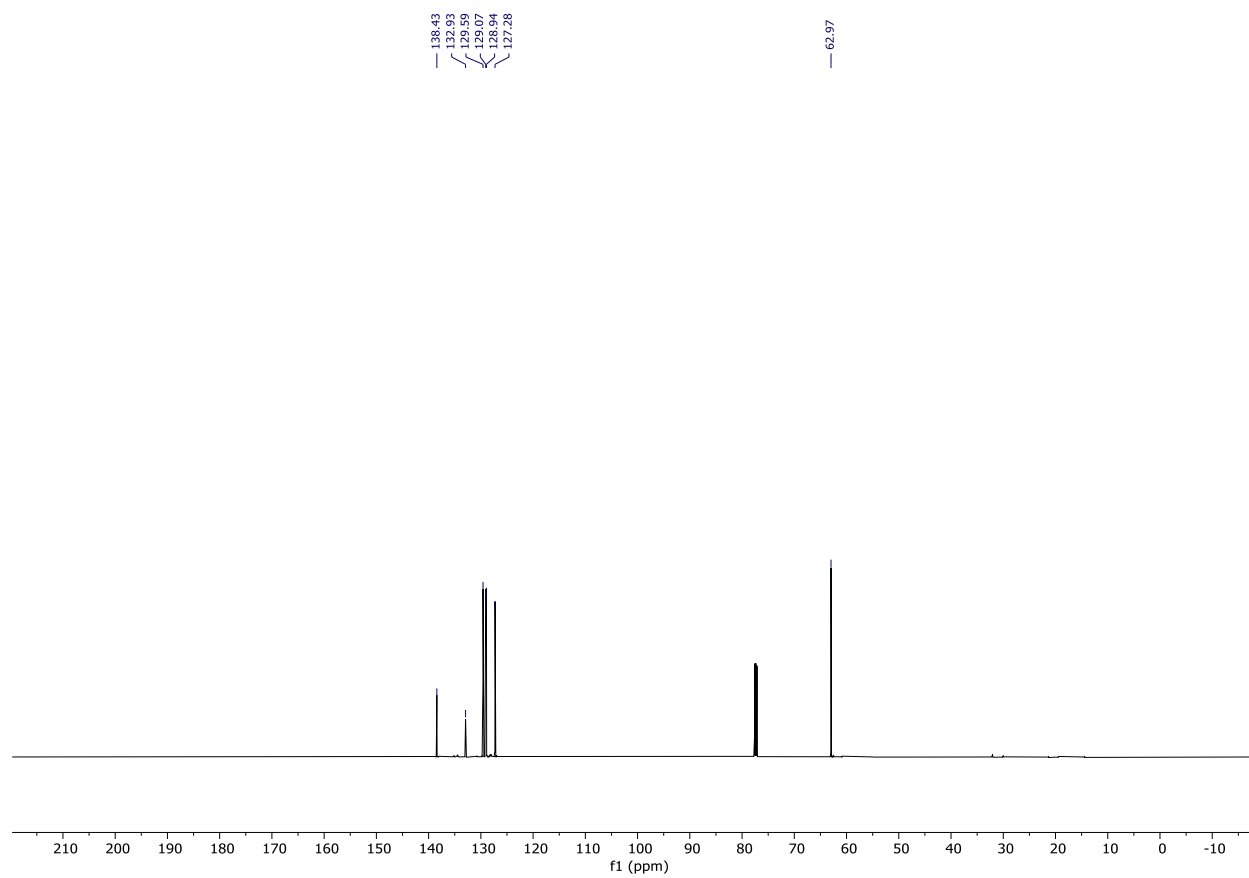

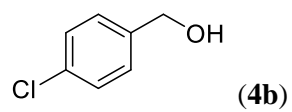

$^1\text{H}$  NMR (600 MHz,  $\text{CDCl}_3$ ):

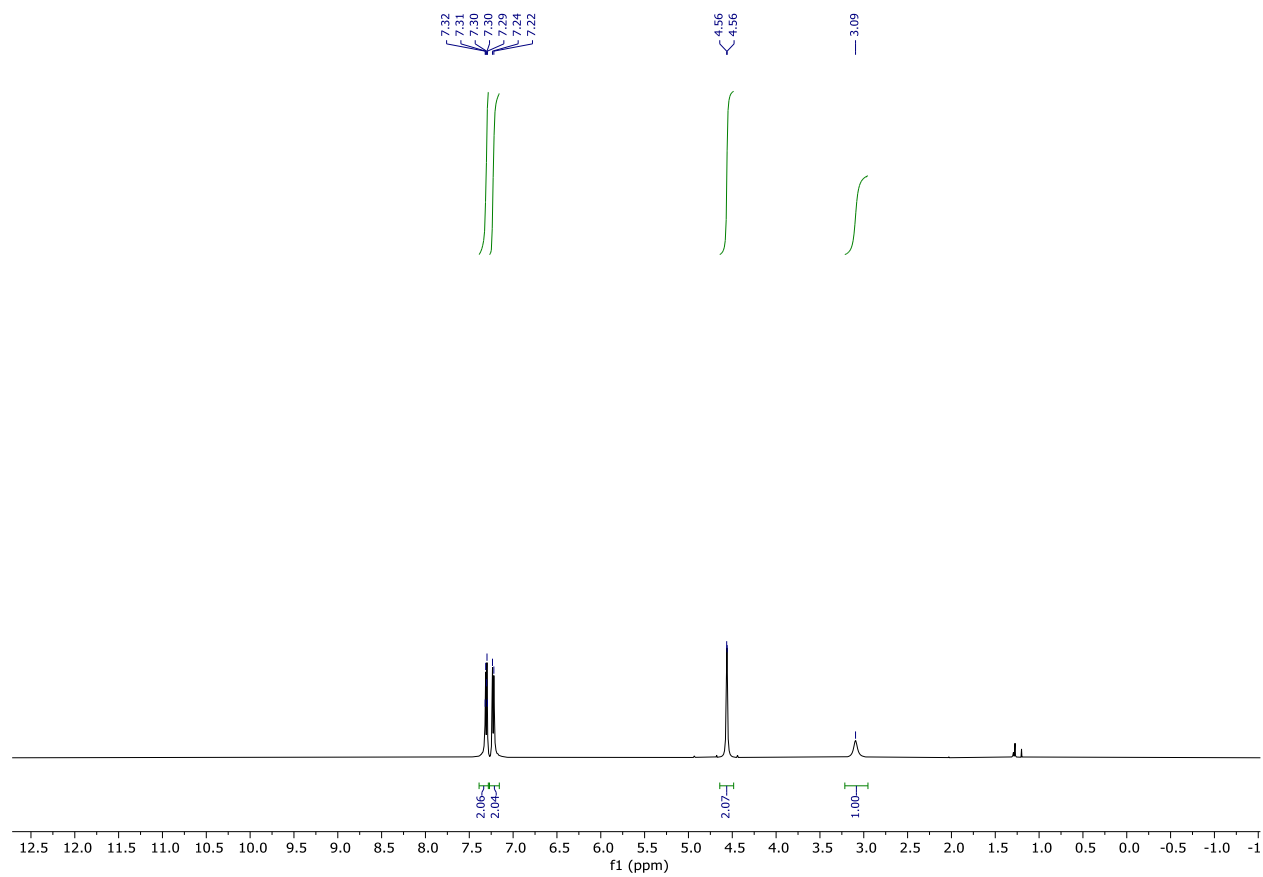

$^{13}\text{C}$  NMR (151 MHz,  $\text{CDCl}_3$ ):

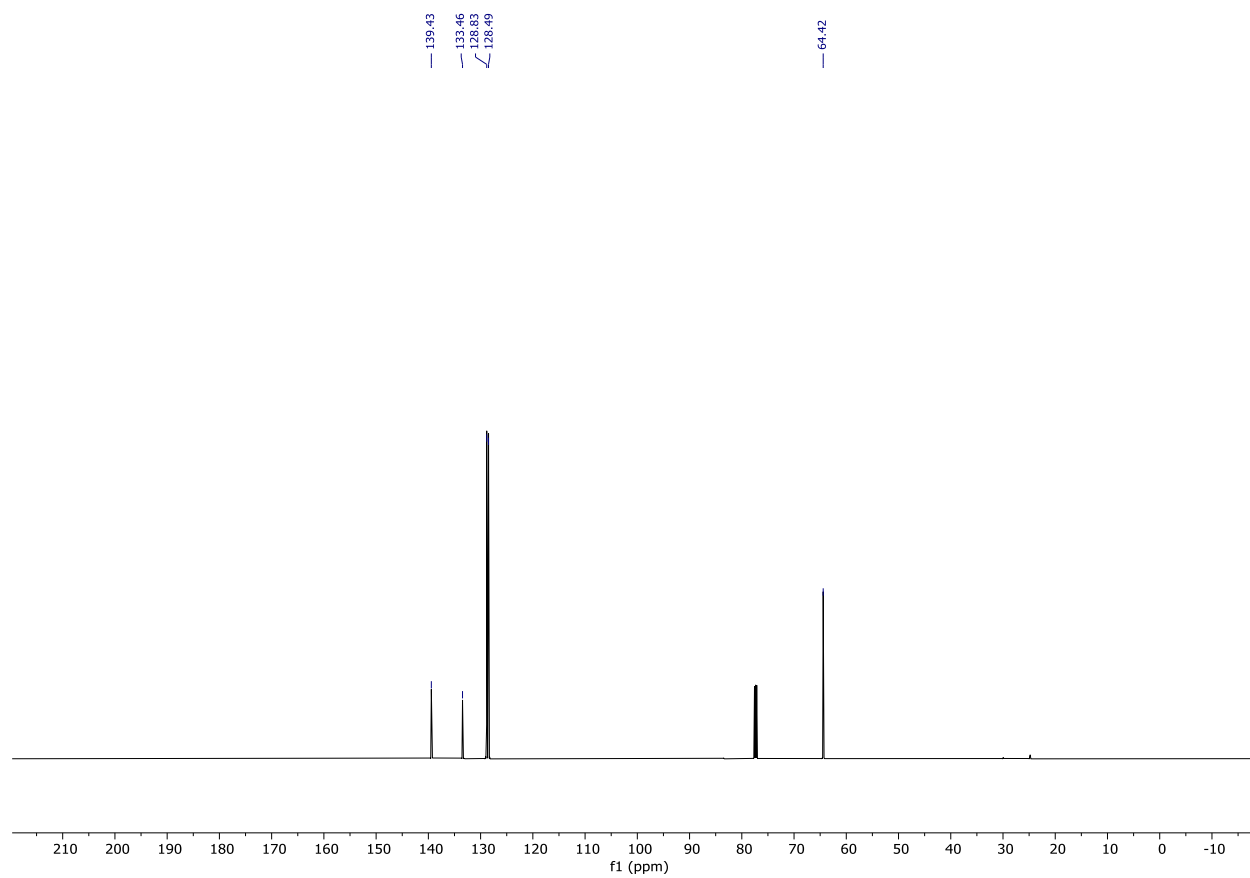

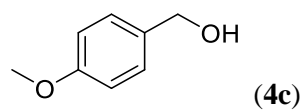

$^1\text{H}$  NMR (500 MHz,  $\text{CDCl}_3$ ):

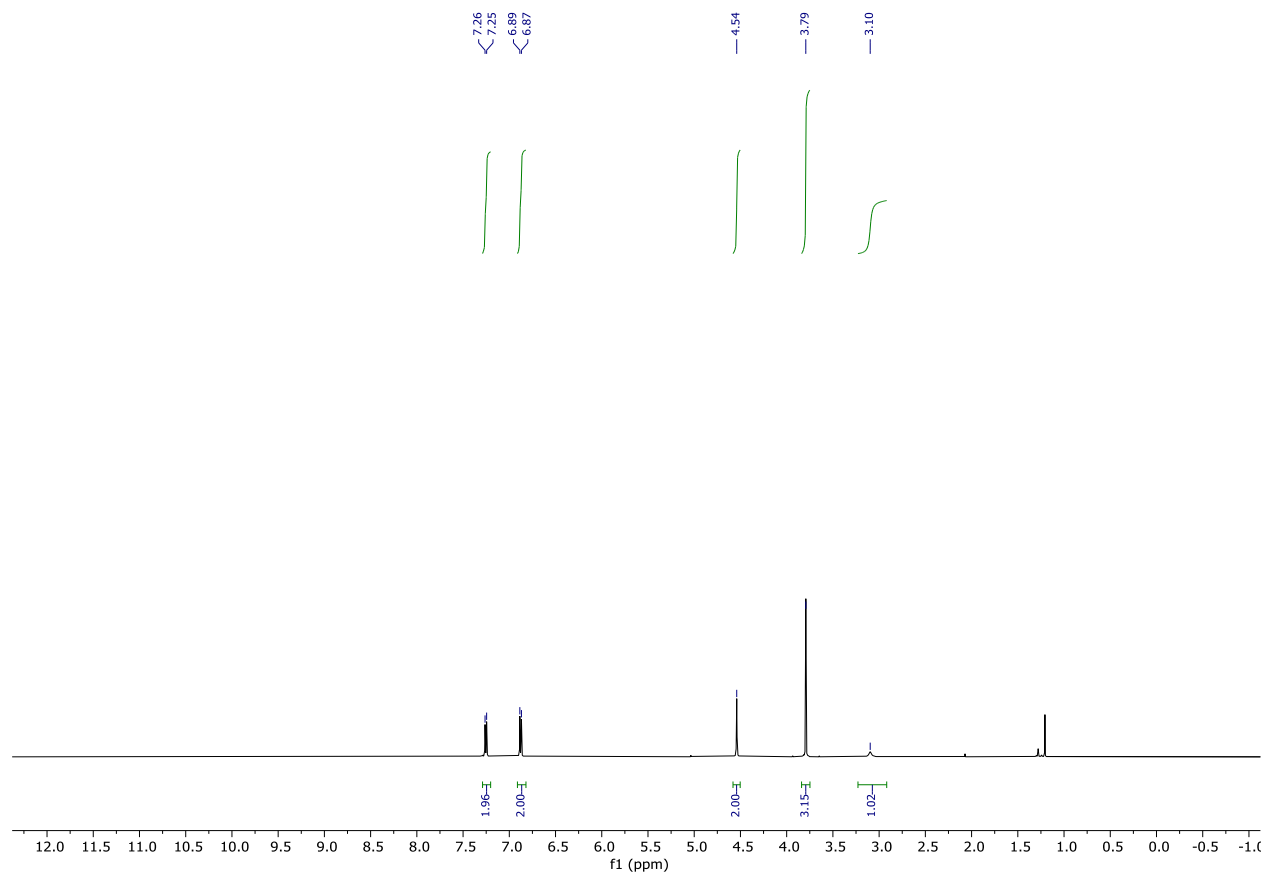

$^{13}\text{C}$  NMR (151 MHz,  $\text{CDCl}_3$ ):

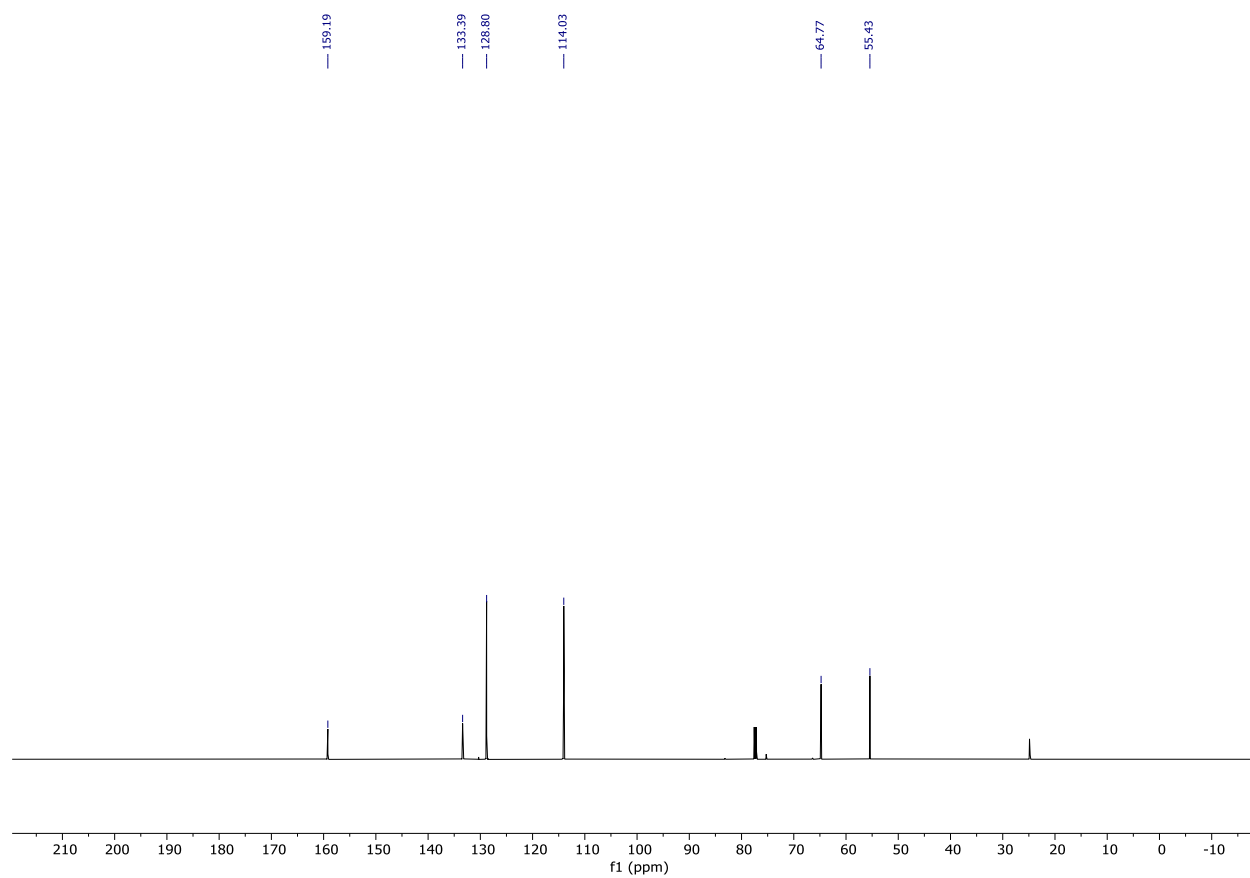

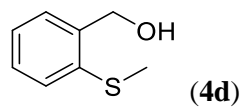

$^1\text{H}$  NMR (500 MHz,  $\text{CDCl}_3$ ):

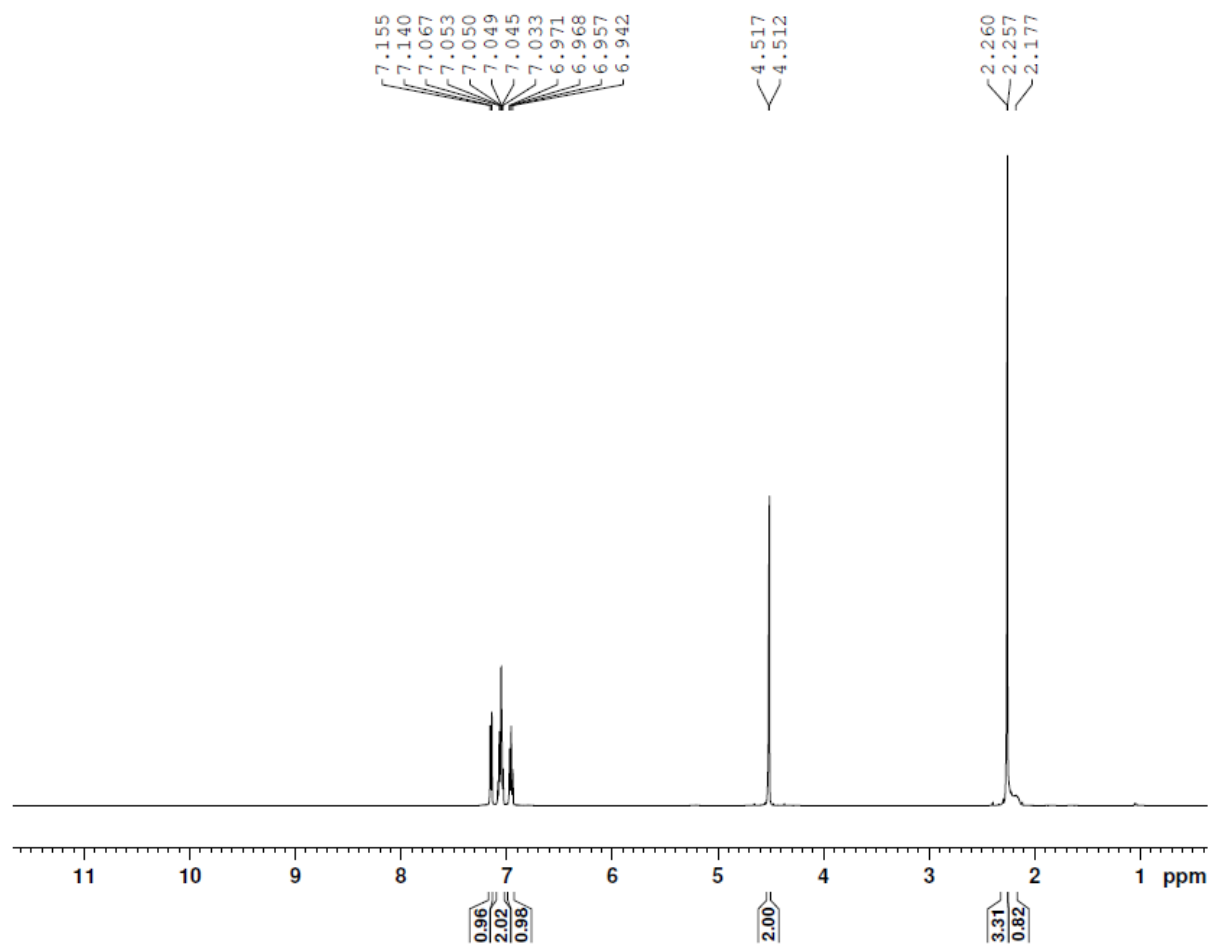

$^{13}\text{C}$  NMR (151 MHz,  $\text{CDCl}_3$ ):

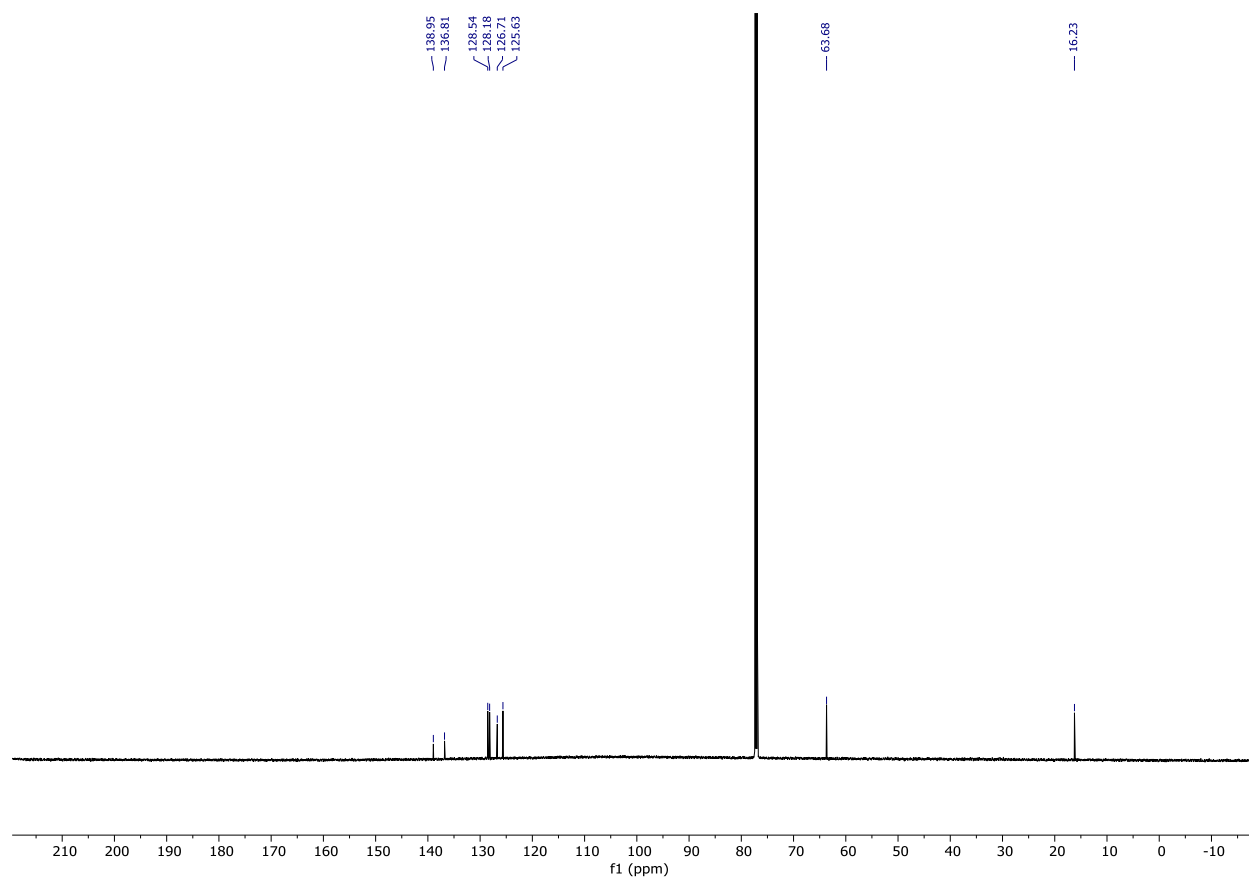

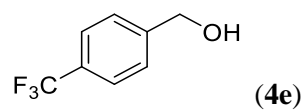

$^1\text{H}$  NMR (600 MHz,  $\text{CDCl}_3$ ):

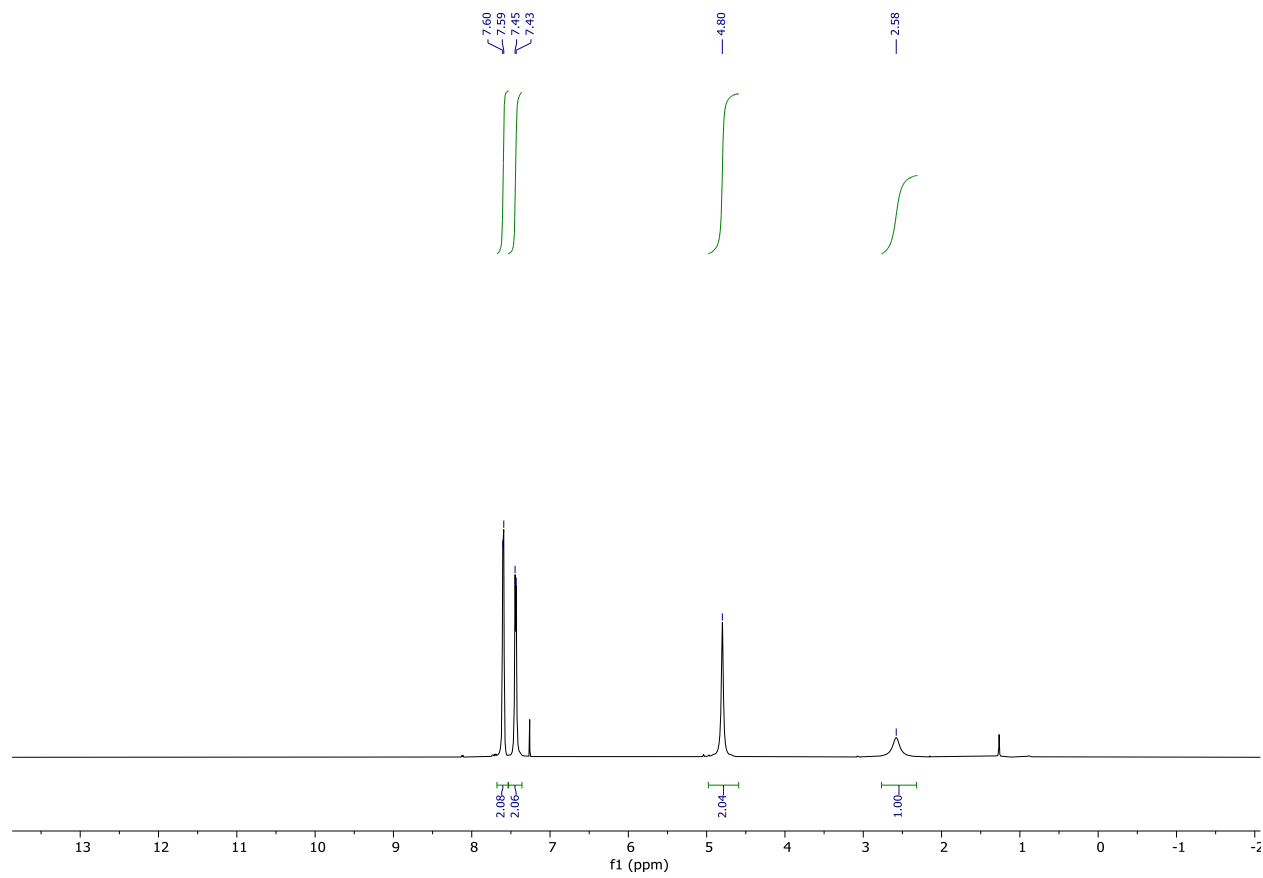

$^{13}\text{C}$  NMR (151 MHz,  $\text{CDCl}_3$ ):

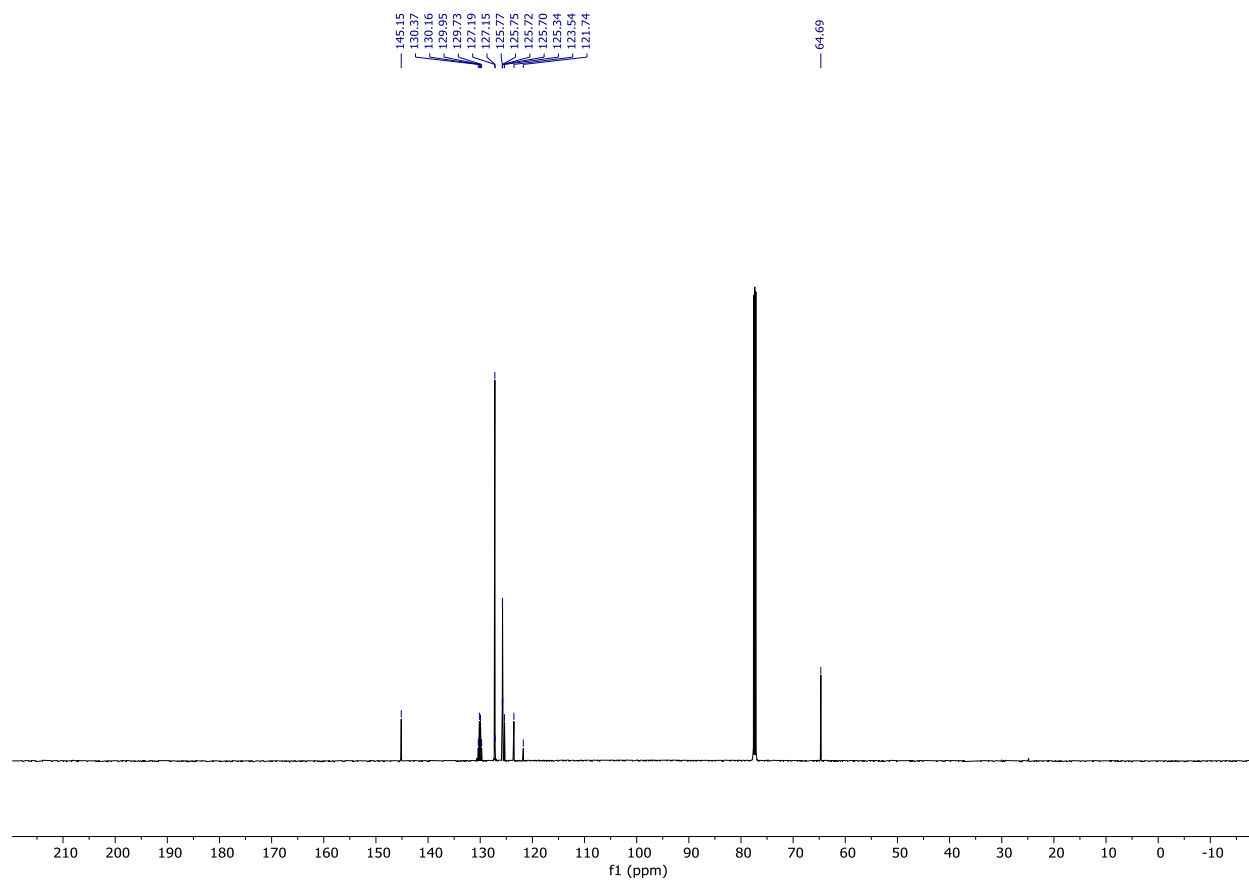

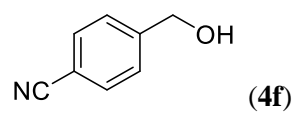

$^1\text{H}$  NMR (600 MHz,  $\text{CDCl}_3$ ):

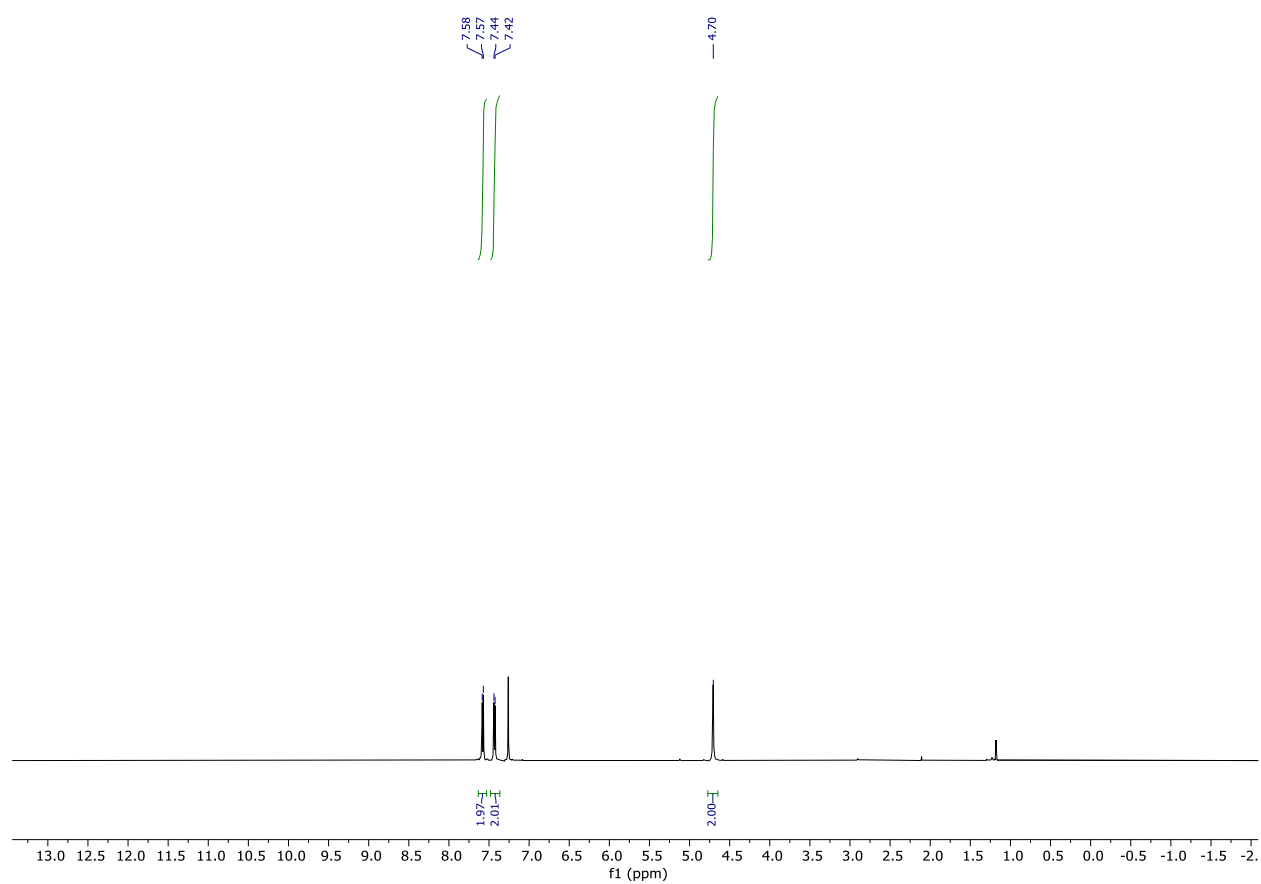

$^{13}\text{C}$  NMR (151 MHz,  $\text{CDCl}_3$ ):

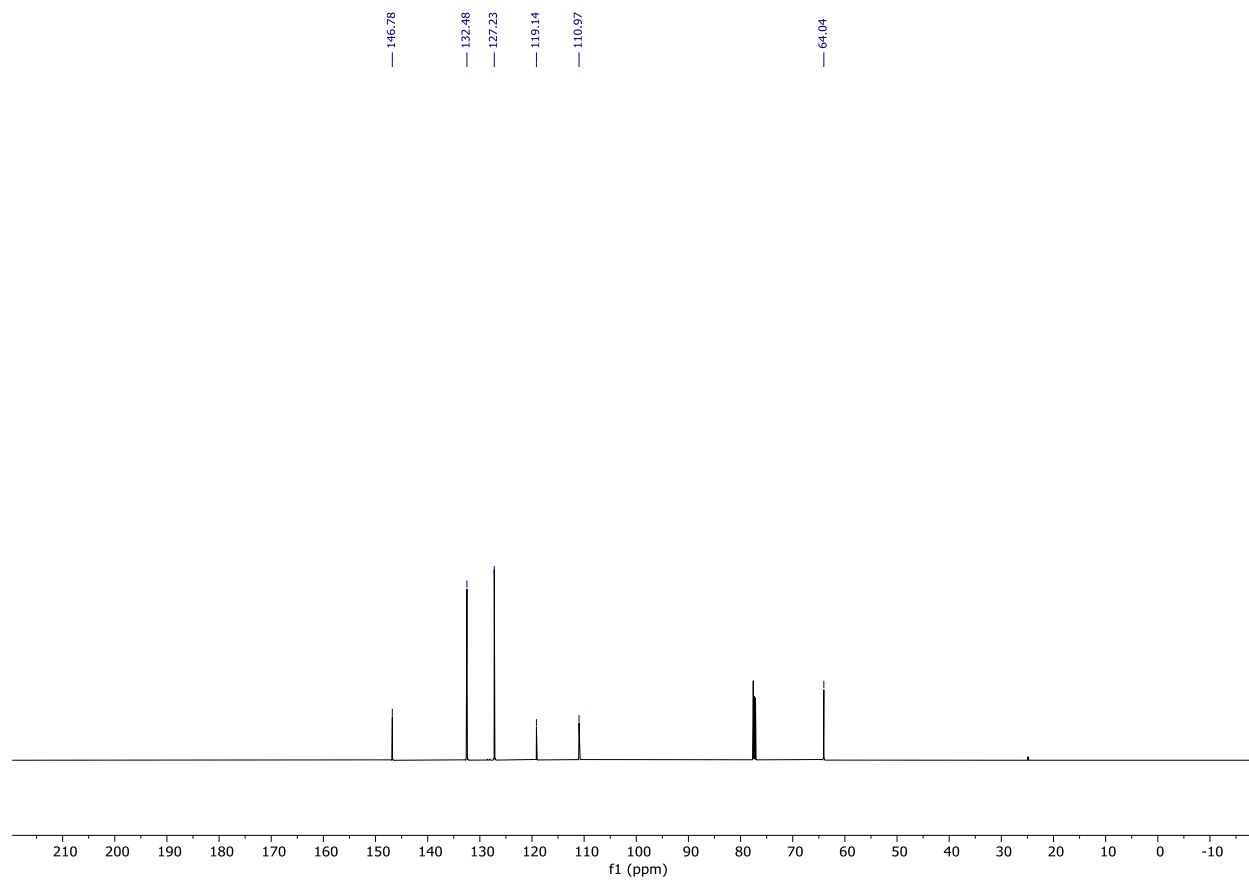

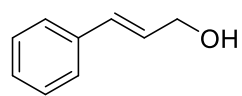

(4g)

$^1\text{H}$  NMR (500 MHz,  $\text{CDCl}_3$ ):

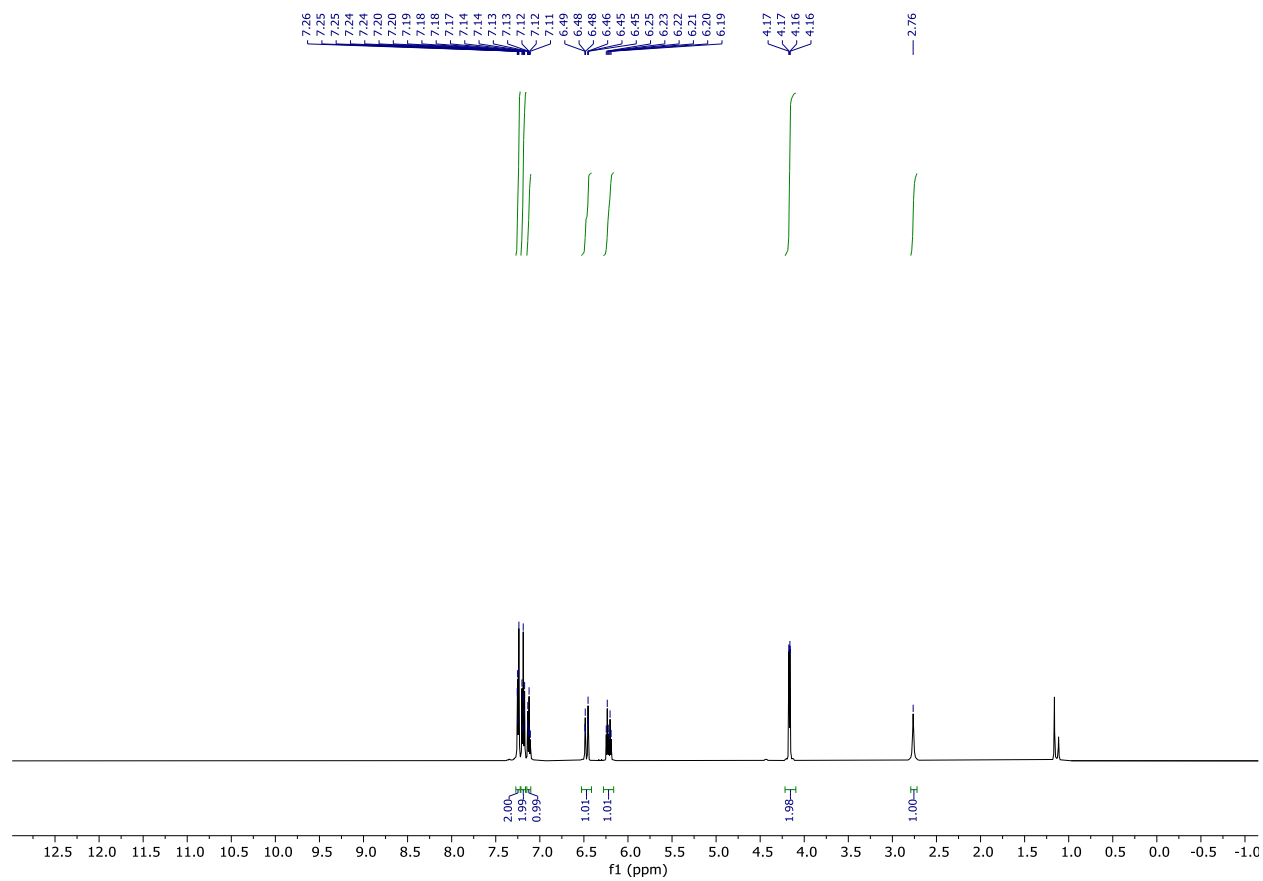

$^{13}\text{C}$  NMR (151 MHz,  $\text{CDCl}_3$ ):

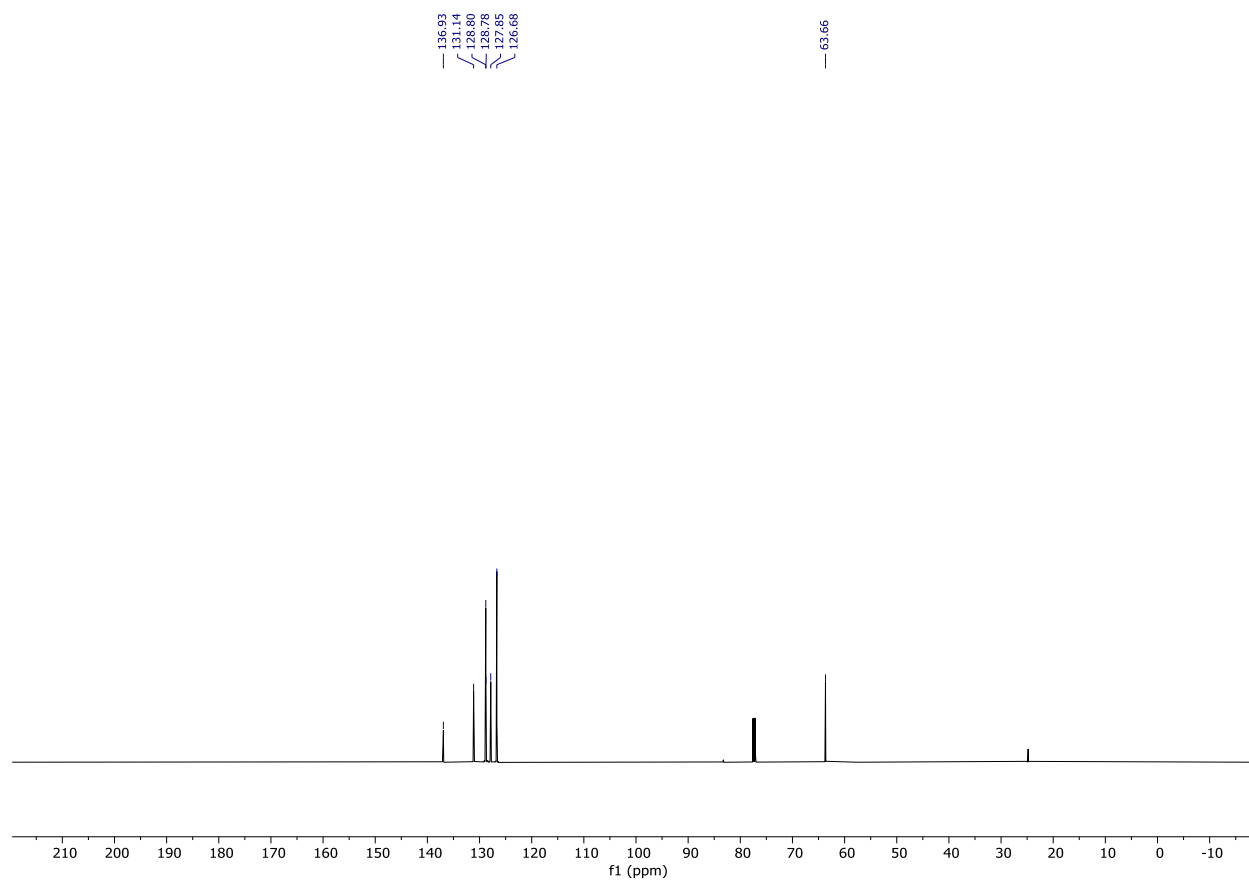

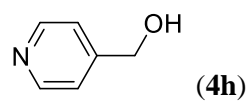

$^1\text{H}$  NMR (600 MHz,  $\text{CDCl}_3$ ):

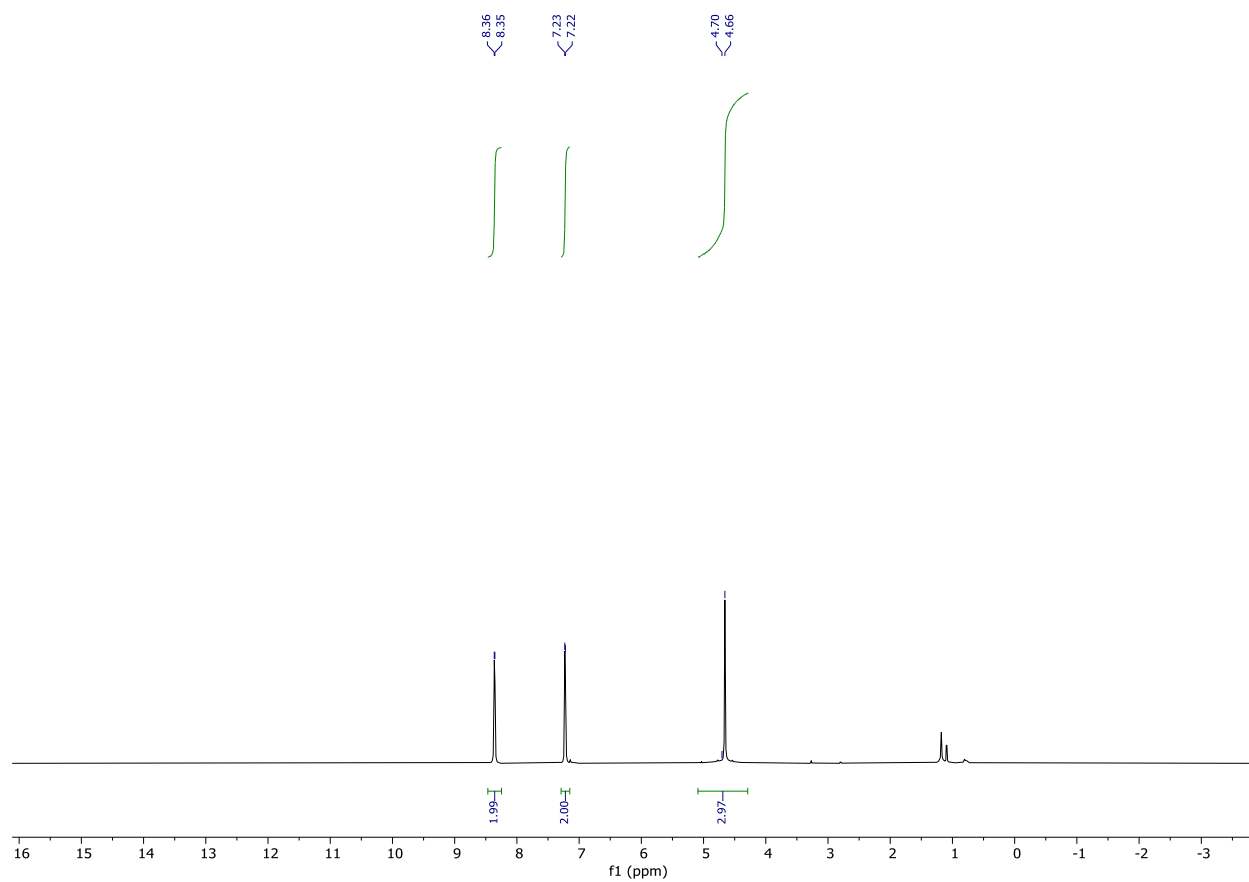

$^{13}\text{C}$  NMR (151 MHz,  $\text{CDCl}_3$ ):

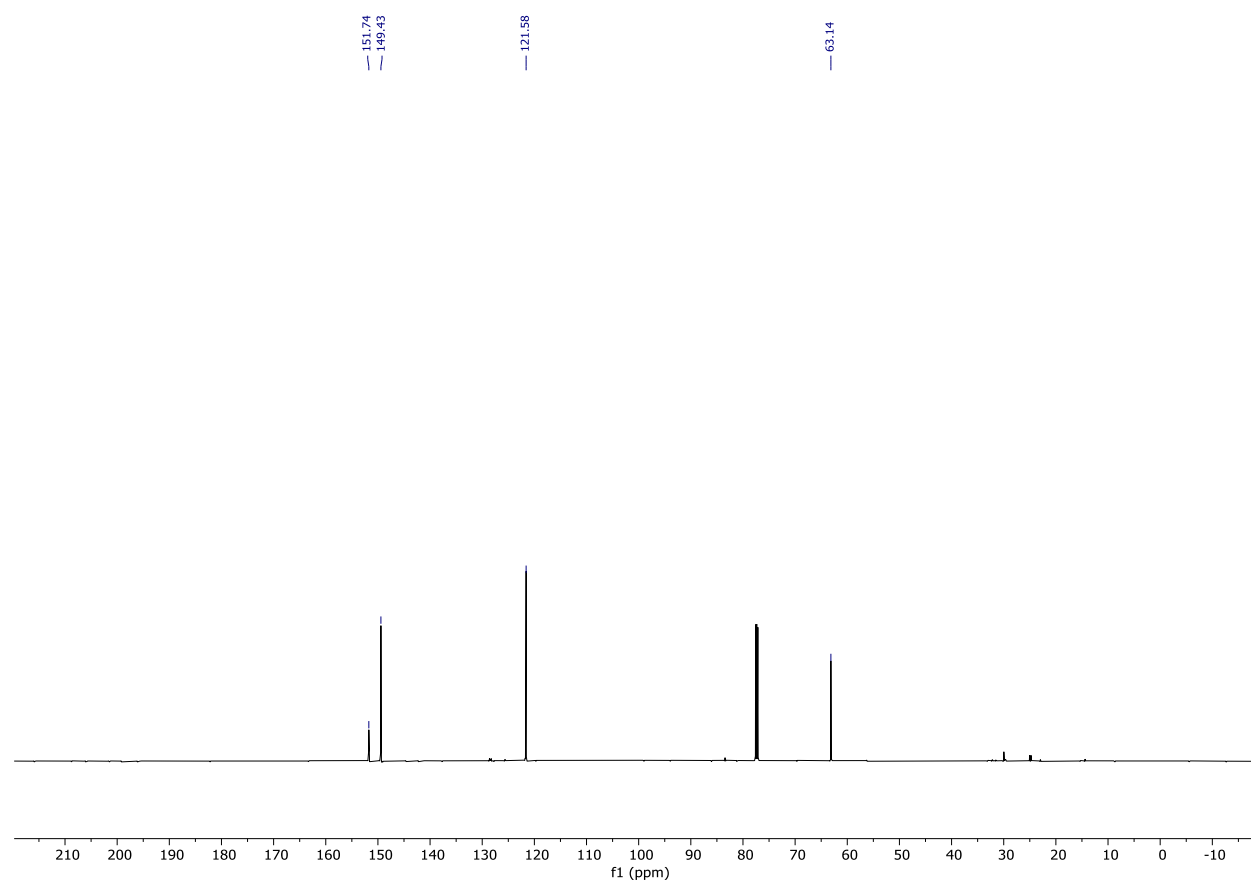

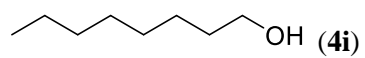

$^1\text{H}$  NMR (600 MHz,  $\text{CDCl}_3$ ):

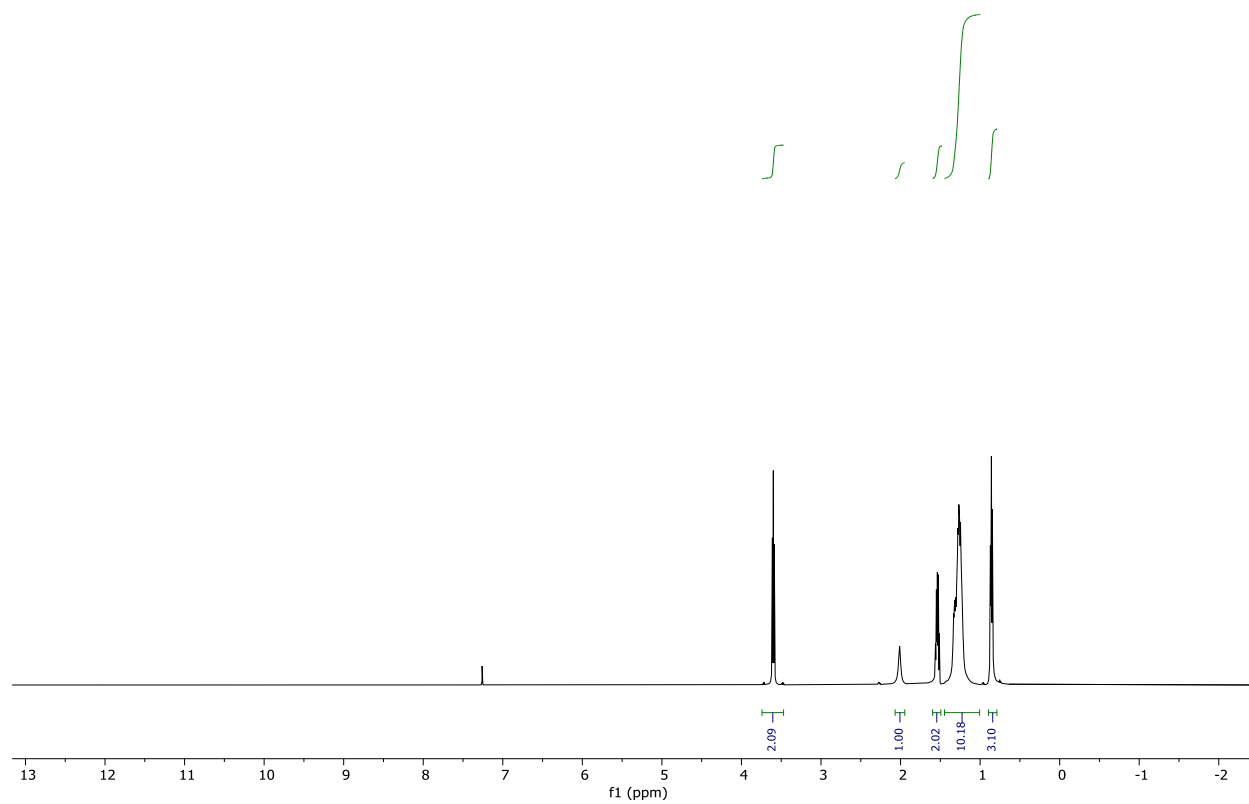

$^{13}\text{C}$  NMR (151 MHz,  $\text{CDCl}_3$ ):

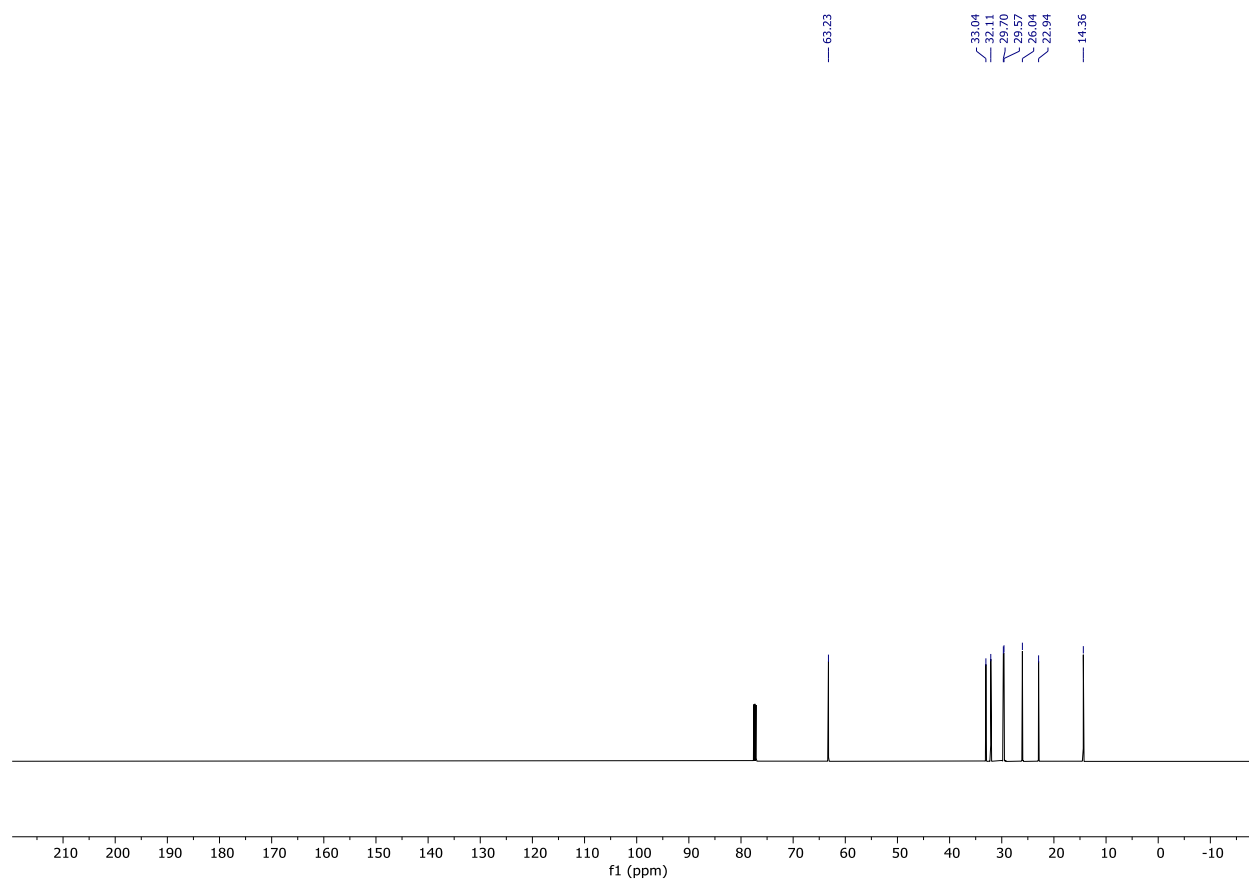

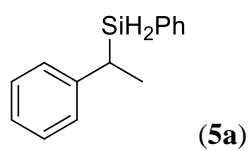

$^1\text{H}$  NMR (400 MHz,  $\text{CDCl}_3$ ):

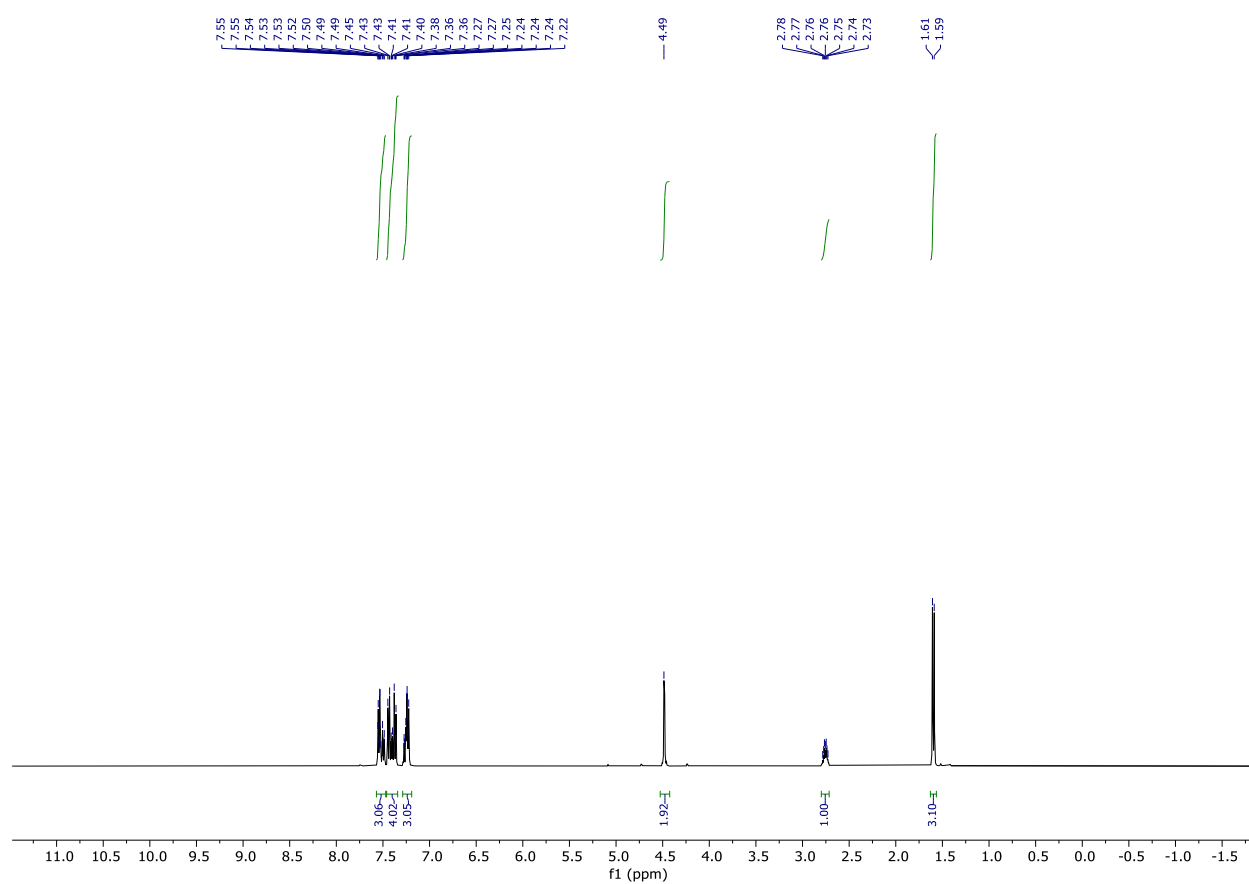

$^{13}\text{C}$  NMR (101 MHz,  $\text{CDCl}_3$ ):

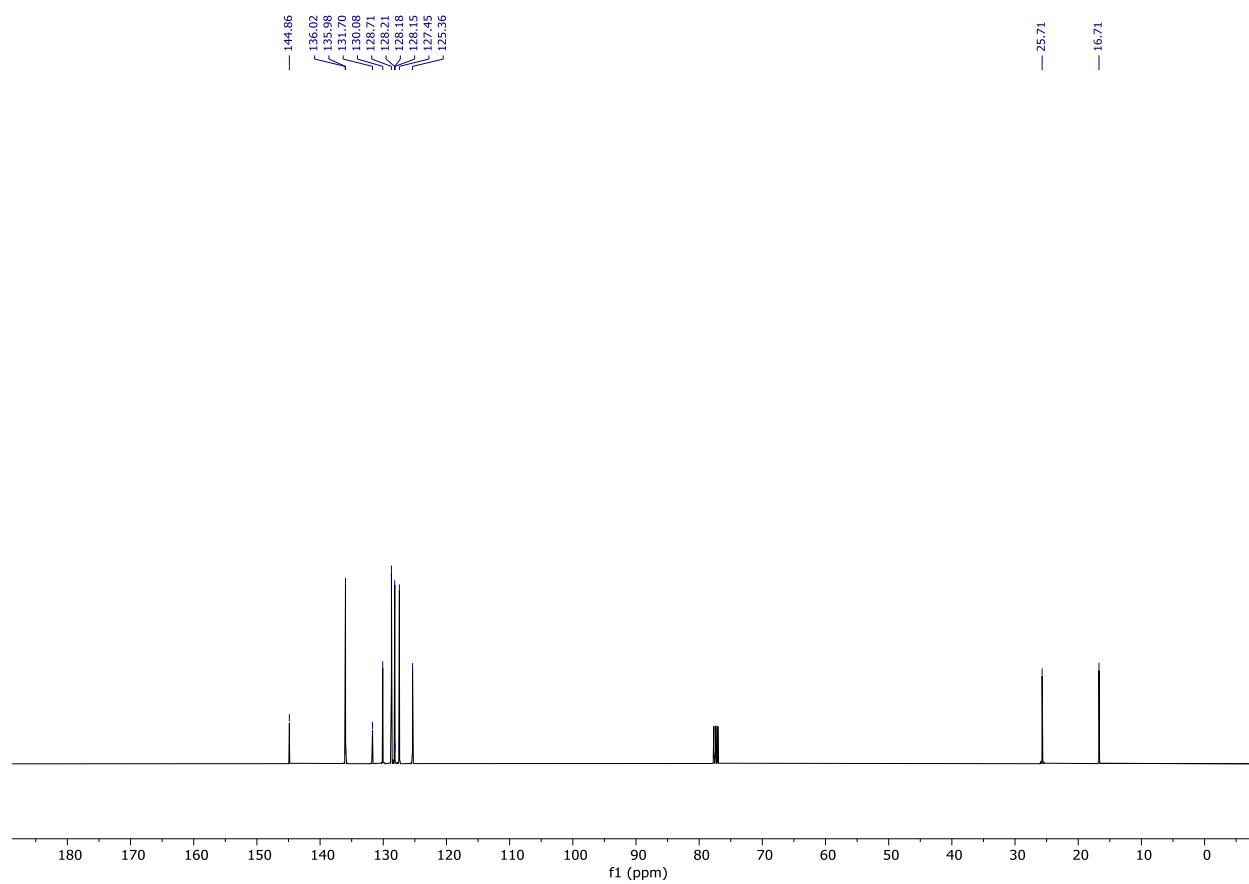

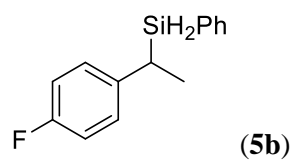

$^1\text{H}$  NMR (500 MHz,  $\text{CDCl}_3$ ):

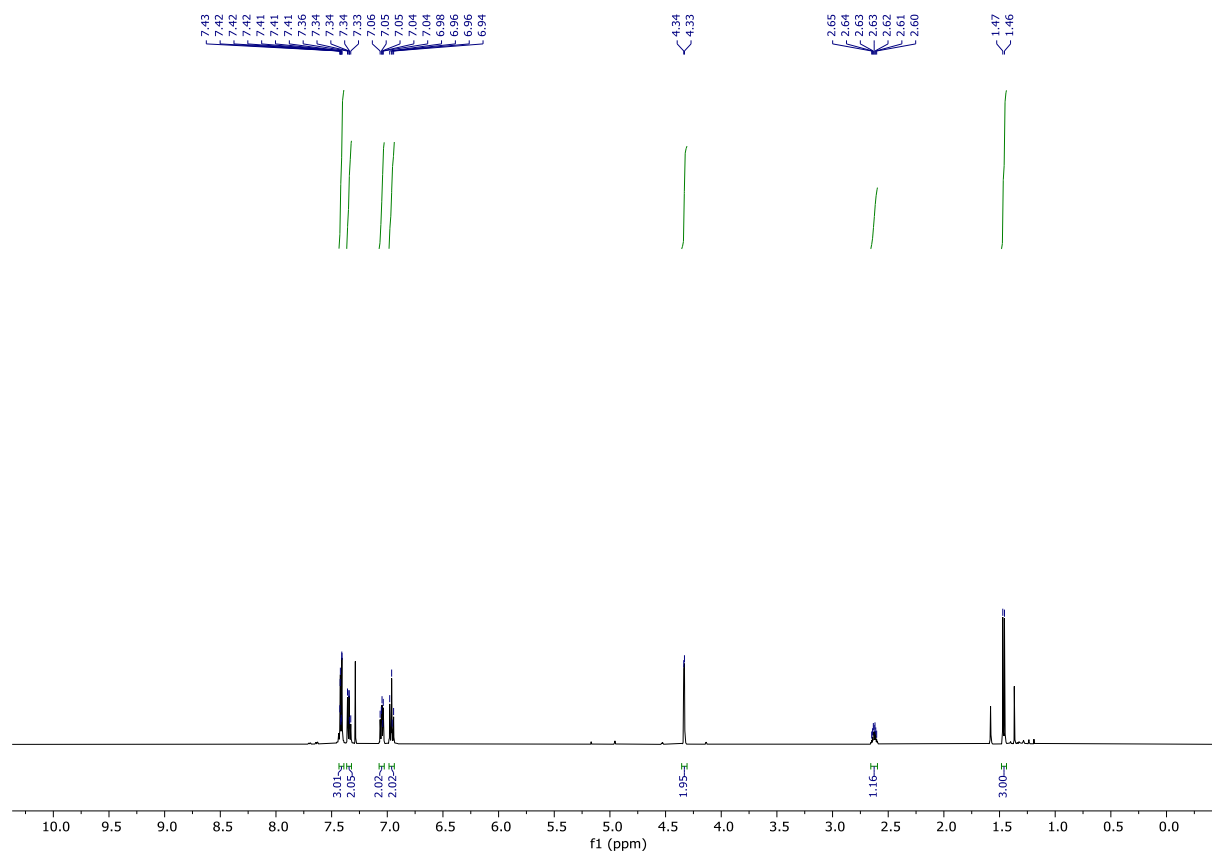

$^{13}\text{C}$  NMR (126 MHz,  $\text{CDCl}_3$ ):

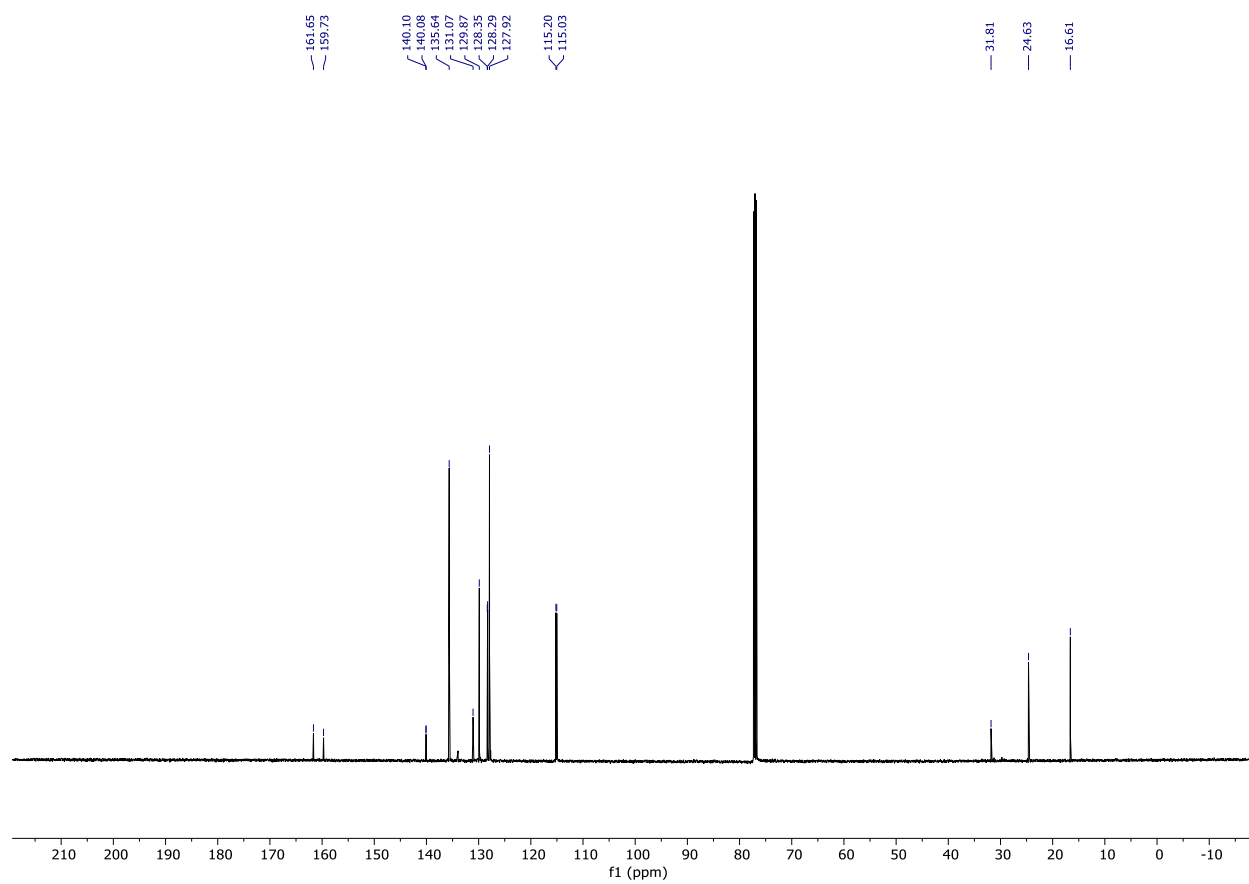

**References:**

1. J. E. Beves, E. C. Constable, C. E. Housecroft, C. Kepert, D. J. Price, *CrystEngComm*, 2007, **9**, 456.
2. H. Zeng, J. Wu, S. Li, C. Hui, A. Ta, S.-Y. Cheng, S. Zheng, G. Zhang, *Org. Lett.* 2019, **21**, 401.
3. G. Zhang, J. Cheng, K. Davis, M. G. Bonifacio, C. Zajaczkowski, *Green Chem.*, 2019, **21**, 1114.
4. G. Zhang, J. Wu, S. Zheng, M. C. Neary, J. Mao, M. Flores, R. J. Trovitch, P. A. Dub. *J. Am. Chem. Soc.*, 2019, **141**, 15230.
5. M. W. Gribble, M. T. Pirnot, J. S. Bandar, R. Y. Liu, S. L. Buchwald, *J. Am. Chem. Soc.*, 2017, **139**, 2192.
